# Supplementary material for: miR-224, miR-147b and miR-31 associated with lymph node metastasis and prognosis for lung adenocarcinoma by regulating PRPF4B, WDR82 or NR3C2
Source: PeerJ. 2020 Nov 24;8:e9704. doi: 10.7717/peerj.9704 (PMC7694553; doi:10.7717/peerj.9704)
Supplement: Table S1 [file peerj-08-9704-s001.xlsx]

## Sheet: All predicted
miRNA	MIMATid	Gene	EntrezID	RefseqID	miRWalk	Microt4	miRanda	mirbridge	miRDB	miRMap	miRNAMap	Pictar2	PITA	RNA22	RNAhybrid	Targetscan	SUM
hsa-miR-3975	MIMAT0019360	CAPZA1	829	NM_006135	1	1	1	0	1	1	0	1	0	0	1	1	8
hsa-miR-3975	MIMAT0019360	CTGF	1490	NM_001901	1	1	1	0	1	1	0	1	0	0	1	1	8
hsa-miR-3975	MIMAT0019360	MITF	4286	NM_198159	1	1	1	0	1	1	0	1	0	0	1	1	8
hsa-miR-3975	MIMAT0019360	SERPINE2	5270	NM_006216	1	1	1	0	1	1	0	1	0	0	1	1	8
hsa-miR-3975	MIMAT0019360	RARB	5915	NM_000965	1	1	1	0	1	1	0	1	0	0	1	1	8
hsa-miR-3975	MIMAT0019360	TPD52L2	7165	NM_199360	1	1	1	0	1	1	0	1	0	0	1	1	8
hsa-miR-3975	MIMAT0019360	CLDN12	9069	NM_001185072	1	1	1	0	1	1	0	1	0	0	1	1	8
hsa-miR-3975	MIMAT0019360	ONECUT2	9480	NM_004852	1	1	1	0	1	1	0	1	0	0	1	1	8
hsa-miR-3975	MIMAT0019360	SV2A	9900	NM_014849	1	1	1	0	1	1	0	1	0	0	1	1	8
hsa-miR-3975	MIMAT0019360	CAB39	51719	NM_001130849	1	1	1	0	1	1	0	1	0	0	1	1	8
hsa-miR-3975	MIMAT0019360	NPAS3	64067	NM_001164749	1	1	1	0	1	1	0	1	0	0	1	1	8
hsa-miR-3975	MIMAT0019360	ACTG1	71	NM_001199954	1	1	1	0	0	1	0	1	0	0	1	1	7
hsa-miR-3975	MIMAT0019360	ARNT	405	NM_001668	1	1	1	0	0	1	0	1	0	0	1	1	7
hsa-miR-3975	MIMAT0019360	CLCN5	1184	NM_001127899	1	1	1	0	1	1	0	0	0	0	1	1	7
hsa-miR-3975	MIMAT0019360	COX10	1352	NM_001303	1	1	1	0	1	1	0	0	0	0	1	1	7
hsa-miR-3975	MIMAT0019360	CRY2	1408	NM_021117	1	1	1	0	0	1	0	1	0	0	1	1	7
hsa-miR-3975	MIMAT0019360	GSR	2936	NM_000637	1	1	1	0	1	1	0	0	0	0	1	1	7
hsa-miR-3975	MIMAT0019360	INSR	3643	NM_000208	1	1	1	0	1	1	0	0	0	0	1	1	7
hsa-miR-3975	MIMAT0019360	LCP1	3936	NM_002298	1	1	1	0	1	1	0	0	0	0	1	1	7
hsa-miR-3975	MIMAT0019360	MUC7	4589	NM_001145006	1	1	1	0	0	1	0	1	0	0	1	1	7
hsa-miR-3975	MIMAT0019360	PRKAB2	5565	NM_005399	1	1	1	0	1	1	0	0	0	0	1	1	7
hsa-miR-3975	MIMAT0019360	STC1	6781	NM_003155	1	1	1	0	0	1	0	1	0	0	1	1	7
hsa-miR-3975	MIMAT0019360	TEAD1	7003	NM_021961	1	1	1	0	0	1	0	1	0	0	1	1	7
hsa-miR-3975	MIMAT0019360	AGPS	8540	NM_003659	1	1	1	0	1	1	0	0	0	0	1	1	7
hsa-miR-3975	MIMAT0019360	CLOCK	9575	NM_001267843	1	1	1	0	0	1	0	1	0	0	1	1	7
hsa-miR-3975	MIMAT0019360	HCN4	10021	NM_005477	1	1	1	0	1	1	0	0	0	0	1	1	7
hsa-miR-3975	MIMAT0019360	PPIE	10450	NM_006112	1	1	1	0	1	1	0	0	0	0	1	1	7
hsa-miR-3975	MIMAT0019360	ZBTB18	10472	NM_006352	1	1	1	0	0	1	0	1	0	0	1	1	7
hsa-miR-3975	MIMAT0019360	HOXB13	10481	NM_006361	1	1	1	0	1	1	0	0	0	0	1	1	7
hsa-miR-3975	MIMAT0019360	KDM2A	22992	NM_012308	0	1	1	0	1	1	0	1	0	0	1	1	7
hsa-miR-3975	MIMAT0019360	RTF1	23168	NM_015138	1	1	1	0	1	1	0	0	0	0	1	1	7
hsa-miR-3975	MIMAT0019360	RGL1	23179	NM_015149	1	1	1	0	0	1	0	1	0	0	1	1	7
hsa-miR-3975	MIMAT0019360	KIAA1549L	25758	NM_012194	1	1	1	0	1	1	0	0	0	0	1	1	7
hsa-miR-3975	MIMAT0019360	ASAP1	50807	NM_001247996	1	1	1	0	1	1	0	0	0	0	1	1	7
hsa-miR-3975	MIMAT0019360	CLDN18	51208	NM_016369	1	1	1	0	1	1	0	0	0	0	1	1	7
hsa-miR-3975	MIMAT0019360	PRMT6	55170	NM_018137	1	1	1	0	1	1	0	0	0	0	1	1	7
hsa-miR-3975	MIMAT0019360	FBXW7	55294	NM_033632	1	1	1	0	0	1	0	1	0	0	1	1	7
hsa-miR-3975	MIMAT0019360	PHTF2	57157	NM_001127358	1	1	1	0	0	1	0	1	0	0	1	1	7
hsa-miR-3975	MIMAT0019360	PPM1H	57460	NM_020700	1	1	1	0	1	1	0	0	0	0	1	1	7
hsa-miR-3975	MIMAT0019360	KIAA1522	57648	NM_020888	1	1	1	0	0	1	0	1	0	0	1	1	7
hsa-miR-3975	MIMAT0019360	ABHD17C	58489	NM_021214	1	1	1	0	0	1	0	1	0	0	1	1	7
hsa-miR-3975	MIMAT0019360	FBRS	64319	NM_001105079	1	1	1	0	0	1	0	1	0	0	1	1	7
hsa-miR-3975	MIMAT0019360	ZBTB10	65986	NM_001105539	1	1	1	0	1	1	0	0	0	0	1	1	7
hsa-miR-3975	MIMAT0019360	SRD5A3	79644	NM_024592	1	1	1	0	1	1	0	0	0	0	1	1	7
hsa-miR-3975	MIMAT0019360	SPSB1	80176	NM_025106	1	1	1	0	1	1	0	0	0	0	1	1	7
hsa-miR-3975	MIMAT0019360	TTBK1	84630	NM_032538	1	1	1	0	0	1	0	1	0	0	1	1	7
hsa-miR-3975	MIMAT0019360	RERG	85004	NM_032918	1	1	1	0	1	1	0	0	0	0	1	1	7
hsa-miR-3975	MIMAT0019360	FAM199X	139231	NM_207318	1	1	1	0	0	1	0	1	0	0	1	1	7
hsa-miR-3975	MIMAT0019360	SLC30A7	148867	NM_133496	1	1	1	0	1	1	0	0	0	0	1	1	7
hsa-miR-3975	MIMAT0019360	TCP10L2	401285	NM_001145121	1	1	1	0	1	1	0	0	0	0	1	1	7
hsa-miR-3975	MIMAT0019360	SLC25A53	401612	NM_001012755	1	1	1	0	0	1	0	1	0	0	1	1	7
hsa-miR-3975	MIMAT0019360	ATXN7L3B	552889	NM_001136262	1	1	1	0	0	1	0	1	0	0	1	1	7
hsa-miR-3975	MIMAT0019360	CLTA	1211	NM_007096	1	0	1	0	1	1	0	1	0	0	1	1	7
hsa-miR-3975	MIMAT0019360	CLTA	1211	NM_001184762	1	0	1	0	1	1	0	1	0	0	1	1	7
hsa-miR-3975	MIMAT0019360	CLTA	1211	NM_001184761	1	0	1	0	1	1	0	1	0	0	1	1	7
hsa-miR-3975	MIMAT0019360	CLTA	1211	NM_001833	1	0	1	0	1	1	0	1	0	0	1	1	7
hsa-miR-3975	MIMAT0019360	CLTA	1211	NM_001184760	1	0	1	0	1	1	0	1	0	0	1	1	7
hsa-miR-3975	MIMAT0019360	CLTA	1211	NM_001076677	1	0	1	0	1	1	0	1	0	0	1	1	7
hsa-miR-3975	MIMAT0019360	EPHA4	2043	NM_004438	1	0	1	0	1	1	0	1	0	0	1	1	7
hsa-miR-3975	MIMAT0019360	MITF	4286	NM_198178	1	0	1	0	1	1	0	1	0	0	1	1	7
hsa-miR-3975	MIMAT0019360	MITF	4286	NM_198158	1	0	1	0	1	1	0	1	0	0	1	1	7
hsa-miR-3975	MIMAT0019360	MITF	4286	NM_000248	1	0	1	0	1	1	0	1	0	0	1	1	7
hsa-miR-3975	MIMAT0019360	MITF	4286	NM_198177	1	0	1	0	1	1	0	1	0	0	1	1	7
hsa-miR-3975	MIMAT0019360	MITF	4286	NM_006722	1	0	1	0	1	1	0	1	0	0	1	1	7
hsa-miR-3975	MIMAT0019360	MITF	4286	NM_001184967	1	0	1	0	1	1	0	1	0	0	1	1	7
hsa-miR-3975	MIMAT0019360	SERPINE2	5270	NM_001136530	1	0	1	0	1	1	0	1	0	0	1	1	7
hsa-miR-3975	MIMAT0019360	SERPINE2	5270	NM_001136528	1	0	1	0	1	1	0	1	0	0	1	1	7
hsa-miR-3975	MIMAT0019360	RARB	5915	NM_016152	1	0	1	0	1	1	0	1	0	0	1	1	7
hsa-miR-3975	MIMAT0019360	TPD52L2	7165	NM_001243894	1	0	1	0	1	1	0	1	0	0	1	1	7
hsa-miR-3975	MIMAT0019360	TPD52L2	7165	NM_001243892	1	0	1	0	1	1	0	1	0	0	1	1	7
hsa-miR-3975	MIMAT0019360	TPD52L2	7165	NM_001243891	1	0	1	0	1	1	0	1	0	0	1	1	7
hsa-miR-3975	MIMAT0019360	TPD52L2	7165	NM_199359	1	0	1	0	1	1	0	1	0	0	1	1	7
hsa-miR-3975	MIMAT0019360	TPD52L2	7165	NM_001243895	1	0	1	0	1	1	0	1	0	0	1	1	7
hsa-miR-3975	MIMAT0019360	TPD52L2	7165	NM_199363	1	0	1	0	1	1	0	1	0	0	1	1	7
hsa-miR-3975	MIMAT0019360	TPD52L2	7165	NM_003288	1	0	1	0	1	1	0	1	0	0	1	1	7
hsa-miR-3975	MIMAT0019360	TPD52L2	7165	NM_199361	1	0	1	0	1	1	0	1	0	0	1	1	7
hsa-miR-3975	MIMAT0019360	TPD52L2	7165	NM_199362	1	0	1	0	1	1	0	1	0	0	1	1	7
hsa-miR-3975	MIMAT0019360	CLDN12	9069	NM_012129	1	0	1	0	1	1	0	1	0	0	1	1	7
hsa-miR-3975	MIMAT0019360	CLDN12	9069	NM_001185073	1	0	1	0	1	1	0	1	0	0	1	1	7
hsa-miR-3975	MIMAT0019360	ACTR3	10096	NM_005721	1	0	1	0	1	1	0	1	0	0	1	1	7
hsa-miR-3975	MIMAT0019360	CAB39	51719	NM_001130850	1	0	1	0	1	1	0	1	0	0	1	1	7
hsa-miR-3975	MIMAT0019360	CAB39	51719	NM_016289	1	0	1	0	1	1	0	1	0	0	1	1	7
hsa-miR-3975	MIMAT0019360	USP47	55031	NM_017944	1	0	1	0	1	1	0	1	0	0	1	1	7
hsa-miR-3975	MIMAT0019360	NPAS3	64067	NM_022123	1	0	1	0	1	1	0	1	0	0	1	1	7
hsa-miR-3975	MIMAT0019360	NPAS3	64067	NM_001165893	1	0	1	0	1	1	0	1	0	0	1	1	7
hsa-miR-3975	MIMAT0019360	NPAS3	64067	NM_173159	1	0	1	0	1	1	0	1	0	0	1	1	7
hsa-miR-3975	MIMAT0019360	AQP2	359	NM_000486	1	1	1	0	0	1	0	0	0	0	1	1	6
hsa-miR-3975	MIMAT0019360	ARHGDIA	396	NM_001185077	1	1	1	0	0	1	0	0	0	0	1	1	6
hsa-miR-3975	MIMAT0019360	ATP1B2	482	NM_001678	1	1	1	0	0	1	0	0	0	0	1	1	6
hsa-miR-3975	MIMAT0019360	ATP6V1C1	528	NM_001695	1	1	1	0	1	0	0	0	0	0	1	1	6
hsa-miR-3975	MIMAT0019360	BCL2L1	598	NM_138578	1	1	1	0	0	1	0	0	0	0	1	1	6
hsa-miR-3975	MIMAT0019360	CEACAM1	634	NM_001712	1	1	1	0	0	1	0	0	0	0	1	1	6
hsa-miR-3975	MIMAT0019360	KLF9	687	NM_001206	1	1	1	0	0	1	0	0	0	0	1	1	6
hsa-miR-3975	MIMAT0019360	FMNL1	752	NM_005892	1	1	1	0	0	1	0	0	0	0	1	1	6
hsa-miR-3975	MIMAT0019360	LDLRAD4	753	NM_001003674	1	1	1	0	0	1	0	0	0	0	1	1	6
hsa-miR-3975	MIMAT0019360	CACNA1E	777	XM_005245477	1	1	1	0	0	1	0	0	0	0	1	1	6
hsa-miR-3975	MIMAT0019360	CCNT1	904	NM_001240	1	1	0	0	0	1	0	1	0	0	1	1	6
hsa-miR-3975	MIMAT0019360	ENTPD1	953	NM_001776	1	1	1	0	0	1	0	0	0	0	1	1	6
hsa-miR-3975	MIMAT0019360	KLF6	1316	NM_001300	1	1	0	0	0	1	0	1	0	0	1	1	6
hsa-miR-3975	MIMAT0019360	CPM	1368	NM_001874	1	1	1	0	0	1	0	0	0	0	1	1	6
hsa-miR-3975	MIMAT0019360	CXADR	1525	NM_001338	1	1	1	0	0	1	0	0	0	0	1	1	6
hsa-miR-3975	MIMAT0019360	DAG1	1605	NM_001165928	1	1	0	0	0	1	0	1	0	0	1	1	6
hsa-miR-3975	MIMAT0019360	DPYSL3	1809	NM_001197294	1	1	0	0	0	1	0	1	0	0	1	1	6
hsa-miR-3975	MIMAT0019360	DRP2	1821	NM_001939	1	1	1	0	0	1	0	0	0	0	1	1	6
hsa-miR-3975	MIMAT0019360	E2F6	1876	NM_001278277	1	1	1	0	0	1	0	0	0	0	1	1	6
hsa-miR-3975	MIMAT0019360	EPHA4	2043	XM_005246374	1	1	1	0	0	1	0	0	0	0	1	1	6
hsa-miR-3975	MIMAT0019360	EPS15	2060	XM_005270617	1	1	1	0	0	1	0	0	0	0	1	1	6
hsa-miR-3975	MIMAT0019360	FKTN	2218	NM_001079802	1	1	1	0	0	1	0	0	0	0	1	1	6
hsa-miR-3975	MIMAT0019360	FOXO3	2309	NM_001455	1	1	1	0	0	1	0	0	0	0	1	1	6
hsa-miR-3975	MIMAT0019360	FLII	2314	NM_002018	1	1	1	0	0	1	0	0	0	0	1	1	6
hsa-miR-3975	MIMAT0019360	GABRA4	2557	NM_000809	1	1	1	0	0	1	0	0	0	0	1	1	6
hsa-miR-3975	MIMAT0019360	GRK5	2869	NM_005308	1	1	0	0	0	1	0	1	0	0	1	1	6
hsa-miR-3975	MIMAT0019360	ITK	3702	NM_005546	1	1	1	0	0	1	0	0	0	0	1	1	6
hsa-miR-3975	MIMAT0019360	JUND	3727	NM_005354	1	1	0	0	0	1	0	1	0	0	1	1	6
hsa-miR-3975	MIMAT0019360	KCNA6	3742	XM_005253686	1	1	1	0	0	1	0	0	0	0	1	1	6
hsa-miR-3975	MIMAT0019360	KCNJ10	3766	NM_002241	1	1	1	0	0	1	0	0	0	0	1	1	6
hsa-miR-3975	MIMAT0019360	KCNJ11	3767	XM_005252910	1	1	1	0	0	1	0	0	0	0	1	1	6
hsa-miR-3975	MIMAT0019360	KIF3C	3797	NM_002254	1	1	1	0	0	1	0	0	0	0	1	1	6
hsa-miR-3975	MIMAT0019360	ABLIM1	3983	XM_005269818	1	1	1	0	0	1	0	0	0	0	1	1	6
hsa-miR-3975	MIMAT0019360	LIPC	3990	XM_005254373	1	1	1	0	0	1	0	0	0	0	1	1	6
hsa-miR-3975	MIMAT0019360	LRP4	4038	NM_002334	1	1	0	0	0	1	0	1	0	0	1	1	6
hsa-miR-3975	MIMAT0019360	TACSTD2	4070	NM_002353	1	1	1	0	0	1	0	0	0	0	1	1	6
hsa-miR-3975	MIMAT0019360	MAT2A	4144	NM_005911	0	1	1	0	1	1	0	0	0	0	1	1	6
hsa-miR-3975	MIMAT0019360	MBD1	4152	NM_015846	1	1	1	0	0	1	0	0	0	0	1	1	6
hsa-miR-3975	MIMAT0019360	MBNL1	4154	NM_021038	1	1	1	0	0	1	0	0	0	0	1	1	6
hsa-miR-3975	MIMAT0019360	MCAM	4162	XM_005271552	1	1	1	0	0	1	0	0	0	0	1	1	6
hsa-miR-3975	MIMAT0019360	MDM4	4194	NM_002393	1	1	1	0	0	1	0	0	0	0	1	1	6
hsa-miR-3975	MIMAT0019360	MECP2	4204	XM_005274683	1	1	1	0	0	1	0	0	0	0	1	1	6
hsa-miR-3975	MIMAT0019360	MECP2	4204	XM_005277853	1	1	1	0	0	1	0	0	0	0	1	1	6
hsa-miR-3975	MIMAT0019360	MET	4233	XM_005250353	1	1	1	0	0	1	0	0	0	0	1	1	6
hsa-miR-3975	MIMAT0019360	MGAT5	4249	XM_005263666	1	1	1	0	0	1	0	0	0	0	1	1	6
hsa-miR-3975	MIMAT0019360	CXCL9	4283	NM_002416	1	1	1	0	0	1	0	0	0	0	1	1	6
hsa-miR-3975	MIMAT0019360	MKLN1	4289	NM_001145354	1	1	1	0	0	1	0	0	0	0	1	1	6
hsa-miR-3975	MIMAT0019360	MAP3K11	4296	NM_002419	1	1	1	0	0	1	0	0	0	0	1	1	6
hsa-miR-3975	MIMAT0019360	MPZ	4359	NM_000530	1	1	0	0	0	1	0	1	0	0	1	1	6
hsa-miR-3975	MIMAT0019360	MSRA	4482	NM_001199729	1	1	1	0	0	1	0	0	0	0	1	1	6
hsa-miR-3975	MIMAT0019360	PPP1R12B	4660	XM_005245201	1	1	1	0	0	1	0	0	0	0	1	1	6
hsa-miR-3975	MIMAT0019360	NAGA	4668	NM_000262	1	1	1	0	0	1	0	0	0	0	1	1	6
hsa-miR-3975	MIMAT0019360	NF1	4763	NM_001042492	1	1	0	0	0	1	0	1	0	0	1	1	6
hsa-miR-3975	MIMAT0019360	NFATC4	4776	NM_001136022	1	1	1	0	0	1	0	0	0	0	1	1	6
hsa-miR-3975	MIMAT0019360	NFIC	4782	NM_205843	1	1	1	0	0	1	0	0	0	0	1	1	6
hsa-miR-3975	MIMAT0019360	NUMA1	4926	XM_005274016	1	1	1	0	0	1	0	0	0	0	1	1	6
hsa-miR-3975	MIMAT0019360	PAPPA	5069	NM_002581	1	1	1	0	0	1	0	0	0	0	1	1	6
hsa-miR-3975	MIMAT0019360	PAX3	5077	NM_181458	1	1	0	0	0	1	0	1	0	0	1	1	6
hsa-miR-3975	MIMAT0019360	PCCB	5096	XM_005247510	1	1	1	0	0	1	0	0	0	0	1	1	6
hsa-miR-3975	MIMAT0019360	PDE4B	5142	NM_001037341	1	1	1	0	0	1	0	0	0	0	1	1	6
hsa-miR-3975	MIMAT0019360	PDE4C	5143	NM_000923	1	1	1	0	0	1	0	0	0	0	1	1	6
hsa-miR-3975	MIMAT0019360	PDE4D	5144	XM_005248538	1	1	1	0	0	1	0	0	0	0	1	1	6
hsa-miR-3975	MIMAT0019360	PDK3	5165	NM_001142386	1	1	1	0	0	1	0	0	0	0	1	1	6
hsa-miR-3975	MIMAT0019360	PHEX	5251	NM_000444	1	1	1	0	0	1	0	0	0	0	1	1	6
hsa-miR-3975	MIMAT0019360	PKD1	5310	NM_001009944	1	1	1	0	0	1	0	0	0	0	1	1	6
hsa-miR-3975	MIMAT0019360	PLXNA1	5361	NM_032242	1	1	1	0	0	1	0	0	0	0	1	1	6
hsa-miR-3975	MIMAT0019360	PPAT	5471	NM_002703	1	1	1	0	0	1	0	0	0	0	1	1	6
hsa-miR-3975	MIMAT0019360	PPP1R3D	5509	NM_006242	1	1	1	0	0	1	0	0	0	0	1	1	6
hsa-miR-3975	MIMAT0019360	PPP3R1	5534	NM_000945	1	1	0	0	0	1	0	1	0	0	1	1	6
hsa-miR-3975	MIMAT0019360	PRELP	5549	NM_002725	1	1	1	0	0	1	0	0	0	0	1	1	6
hsa-miR-3975	MIMAT0019360	MAPK4	5596	XM_005258299	1	1	1	0	0	1	0	0	0	0	1	1	6
hsa-miR-3975	MIMAT0019360	PSMD8	5714	NM_002812	1	1	1	0	0	1	0	0	0	0	1	1	6
hsa-miR-3975	MIMAT0019360	PTGFR	5737	NM_001039585	1	1	1	0	0	1	0	0	0	0	1	1	6
hsa-miR-3975	MIMAT0019360	PTGS1	5742	XM_005252104	1	1	1	0	0	1	0	0	0	0	1	1	6
hsa-miR-3975	MIMAT0019360	PTMS	5763	XM_005253718	1	1	1	0	0	1	0	0	0	0	1	1	6
hsa-miR-3975	MIMAT0019360	RARG	5916	XM_005269054	1	1	1	0	0	1	0	0	0	0	1	1	6
hsa-miR-3975	MIMAT0019360	DPF2	5977	NM_006268	1	1	1	0	0	1	0	0	0	0	1	1	6
hsa-miR-3975	MIMAT0019360	REST	5978	NM_005612	1	1	1	0	0	1	0	0	0	0	1	1	6
hsa-miR-3975	MIMAT0019360	RFX5	5993	XM_005245408	1	1	1	0	0	1	0	0	0	0	1	1	6
hsa-miR-3975	MIMAT0019360	RORA	6095	NM_134260	1	1	0	0	0	1	0	1	0	0	1	1	6
hsa-miR-3975	MIMAT0019360	SATB1	6304	NM_001195470	1	1	0	0	0	1	0	1	0	0	1	1	6
hsa-miR-3975	MIMAT0019360	SC5D	6309	NM_001024956	1	1	1	0	1	0	0	0	0	0	1	1	6
hsa-miR-3975	MIMAT0019360	SCN1B	6324	NM_001037	1	1	0	0	0	1	0	1	0	0	1	1	6
hsa-miR-3975	MIMAT0019360	SDC2	6383	NM_002998	1	1	0	0	0	1	0	1	0	0	1	1	6
hsa-miR-3975	MIMAT0019360	SEL1L	6400	NM_005065	1	1	1	0	0	1	0	0	0	0	1	1	6
hsa-miR-3975	MIMAT0019360	SELL	6402	NM_000655	1	1	1	0	0	1	0	0	0	0	1	1	6
hsa-miR-3975	MIMAT0019360	SRSF6	6431	NM_006275	1	1	1	0	0	1	0	0	0	0	1	1	6
hsa-miR-3975	MIMAT0019360	SGCD	6444	NM_000337	1	1	1	0	0	1	0	0	0	0	1	1	6
hsa-miR-3975	MIMAT0019360	SLC11A1	6556	NM_000578	1	1	1	0	0	1	0	0	0	0	1	1	6
hsa-miR-3975	MIMAT0019360	SLIT3	6586	NM_001271946	1	1	1	0	0	1	0	0	0	0	1	1	6
hsa-miR-3975	MIMAT0019360	SMO	6608	NM_005631	1	1	1	0	0	1	0	0	0	0	1	1	6
hsa-miR-3975	MIMAT0019360	SOX5	6660	NM_152989	1	1	0	0	0	1	0	1	0	0	1	1	6
hsa-miR-3975	MIMAT0019360	SRPK2	6733	XM_005250549	1	1	1	0	0	1	0	0	0	0	1	1	6
hsa-miR-3975	MIMAT0019360	TCF3	6929	XM_005259623	1	1	1	0	0	1	0	0	0	0	1	1	6
hsa-miR-3975	MIMAT0019360	TEP1	7011	NM_007110	1	1	1	0	0	1	0	0	0	0	1	1	6
hsa-miR-3975	MIMAT0019360	NR2E1	7101	NM_003269	1	1	0	0	0	1	0	1	0	0	1	1	6
hsa-miR-3975	MIMAT0019360	TNFAIP2	7127	XM_005268036	1	1	1	0	0	1	0	0	0	0	1	1	6
hsa-miR-3975	MIMAT0019360	TRPS1	7227	NM_014112	1	1	1	0	0	1	0	0	0	0	1	1	6
hsa-miR-3975	MIMAT0019360	TUB	7275	NM_003320	1	1	1	0	0	1	0	0	0	0	1	1	6
hsa-miR-3975	MIMAT0019360	UBE2I	7329	NM_194259	1	1	0	0	0	1	0	1	0	0	1	1	6
hsa-miR-3975	MIMAT0019360	UFD1L	7353	XM_005261276	1	1	1	0	0	1	0	0	0	0	1	1	6
hsa-miR-3975	MIMAT0019360	COL14A1	7373	NM_021110	1	1	1	0	0	1	0	0	0	0	1	1	6
hsa-miR-3975	MIMAT0019360	CORO2A	7464	NM_003389	1	1	1	0	0	1	0	0	0	0	1	1	6
hsa-miR-3975	MIMAT0019360	YWHAG	7532	NM_012479	1	1	0	0	0	1	0	1	0	0	1	1	6
hsa-miR-3975	MIMAT0019360	ZNF226	7769	XM_005259227	1	1	1	0	0	1	0	0	0	0	1	1	6
hsa-miR-3975	MIMAT0019360	LAPTM5	7805	NM_006762	1	1	1	0	0	1	0	0	0	0	1	1	6
hsa-miR-3975	MIMAT0019360	FZD3	7976	NM_017412	1	1	1	0	0	1	0	0	0	0	1	1	6
hsa-miR-3975	MIMAT0019360	TUSC3	7991	NM_006765	1	1	1	0	0	1	0	0	0	0	1	1	6
hsa-miR-3975	MIMAT0019360	STAM	8027	NM_003473	1	1	1	0	0	1	0	0	0	0	1	1	6
hsa-miR-3975	MIMAT0019360	CUL5	8065	NM_003478	1	1	1	0	0	1	0	0	0	0	1	1	6
hsa-miR-3975	MIMAT0019360	HIRIP3	8479	NM_003609	1	1	1	0	0	1	0	0	0	0	1	1	6
hsa-miR-3975	MIMAT0019360	KLF7	8609	NM_003709	1	1	0	0	0	1	0	1	0	0	1	1	6
hsa-miR-3975	MIMAT0019360	TNKS	8658	XM_005272399	1	1	1	0	0	1	0	0	0	0	1	1	6
hsa-miR-3975	MIMAT0019360	SNX3	8724	NM_003795	1	1	1	0	0	1	0	0	0	0	1	1	6
hsa-miR-3975	MIMAT0019360	NRP1	8829	NM_003873	1	1	1	0	0	1	0	0	0	0	1	1	6
hsa-miR-3975	MIMAT0019360	MTMR3	8897	NM_021090	1	1	1	0	0	1	0	0	0	0	1	1	6
hsa-miR-3975	MIMAT0019360	MTMR2	8898	NM_001243571	1	1	1	0	0	1	0	0	0	0	1	1	6
hsa-miR-3975	MIMAT0019360	BTRC	8945	NM_033637	1	1	1	0	0	1	0	0	0	0	1	1	6
hsa-miR-3975	MIMAT0019360	SEC22C	9117	XM_005265532	1	1	1	0	0	1	0	0	0	0	1	1	6
hsa-miR-3975	MIMAT0019360	AKAP6	9472	NM_004274	1	1	1	0	1	0	0	0	0	0	1	1	6
hsa-miR-3975	MIMAT0019360	MAGED1	9500	NM_001005333	1	1	0	0	0	1	0	1	0	0	1	1	6
hsa-miR-3975	MIMAT0019360	H6PD	9563	XM_005263539	1	1	1	0	0	1	0	0	0	0	1	1	6
hsa-miR-3975	MIMAT0019360	CREB5	9586	NM_182898	1	1	1	0	0	1	0	0	0	0	1	1	6
hsa-miR-3975	MIMAT0019360	TCL1B	9623	NM_004918	1	1	1	0	0	1	0	0	0	0	1	1	6
hsa-miR-3975	MIMAT0019360	N4BP1	9683	NM_153029	1	1	1	0	0	1	0	0	0	0	1	1	6
hsa-miR-3975	MIMAT0019360	SECISBP2L	9728	NM_001193489	1	1	1	0	0	1	0	0	0	0	1	1	6
hsa-miR-3975	MIMAT0019360	SETD1A	9739	NM_014712	1	1	0	0	0	1	0	1	0	0	1	1	6
hsa-miR-3975	MIMAT0019360	ATG13	9776	NM_001205119	1	1	1	0	0	1	0	0	0	0	1	1	6
hsa-miR-3975	MIMAT0019360	SPOCK2	9806	NM_001244950	1	1	1	0	0	1	0	0	0	0	1	1	6
hsa-miR-3975	MIMAT0019360	KIAA0141	9812	NM_014773	1	1	1	0	0	1	0	0	0	0	1	1	6
hsa-miR-3975	MIMAT0019360	ZBTB24	9841	NM_014797	1	1	1	0	0	1	0	0	0	0	1	1	6
hsa-miR-3975	MIMAT0019360	MAGI2	9863	XM_005250725	1	1	1	0	0	1	0	0	0	0	1	1	6
hsa-miR-3975	MIMAT0019360	TMCC2	9911	NM_014858	1	1	0	0	0	1	0	1	0	0	1	1	6
hsa-miR-3975	MIMAT0019360	EXOG	9941	NM_005107	1	1	1	0	0	1	0	0	0	0	1	1	6
hsa-miR-3975	MIMAT0019360	COQ7	10229	XM_005255033	1	1	1	0	0	1	0	0	0	0	1	1	6
hsa-miR-3975	MIMAT0019360	GPHN	10243	NM_020806	1	1	1	0	0	1	0	0	0	0	1	1	6
hsa-miR-3975	MIMAT0019360	SPRY3	10251	NM_005840	1	1	1	0	0	1	0	0	0	0	1	1	6
hsa-miR-3975	MIMAT0019360	CCNO	10309	NM_021147	1	1	1	0	0	1	0	0	0	0	1	1	6
hsa-miR-3975	MIMAT0019360	PCGF3	10336	XM_005272253	1	1	1	0	0	1	0	0	0	0	1	1	6
hsa-miR-3975	MIMAT0019360	MCRS1	10445	XM_005268572	1	1	1	0	0	1	0	0	0	0	1	1	6
hsa-miR-3975	MIMAT0019360	NXF1	10482	NM_001081491	1	1	0	0	0	1	0	1	0	0	1	1	6
hsa-miR-3975	MIMAT0019360	IGF2BP2	10644	NM_006548	1	1	0	0	0	1	0	1	0	0	1	1	6
hsa-miR-3975	MIMAT0019360	CELF2	10659	NM_001025077	0	1	1	0	0	1	0	1	0	0	1	1	6
hsa-miR-3975	MIMAT0019360	CTCF	10664	NM_006565	1	1	0	0	0	1	0	1	0	0	1	1	6
hsa-miR-3975	MIMAT0019360	NFAT5	10725	XM_005255777	1	1	1	0	0	1	0	0	0	0	1	1	6
hsa-miR-3975	MIMAT0019360	WASF3	10810	NM_006646	1	1	1	0	0	1	0	0	0	0	1	1	6
hsa-miR-3975	MIMAT0019360	TRIOBP	11078	NM_001039141	1	1	1	0	0	1	0	0	0	0	1	1	6
hsa-miR-3975	MIMAT0019360	BAZ2A	11176	NM_013449	1	1	1	0	0	1	0	0	0	0	1	1	6
hsa-miR-3975	MIMAT0019360	RNF24	11237	NM_007219	1	1	1	0	0	1	0	0	0	0	1	1	6
hsa-miR-3975	MIMAT0019360	KLF12	11278	XM_005266251	1	1	1	0	0	1	0	0	0	0	1	1	6
hsa-miR-3975	MIMAT0019360	STK38	11329	NM_007271	1	1	1	0	0	1	0	0	0	0	1	1	6
hsa-miR-3975	MIMAT0019360	BAHD1	22893	XM_005254229	1	1	1	0	0	1	0	0	0	0	1	1	6
hsa-miR-3975	MIMAT0019360	RPH3A	22895	NM_001143854	1	1	1	0	0	1	0	0	0	0	1	1	6
hsa-miR-3975	MIMAT0019360	PCNX	22990	NM_014982	1	1	0	0	0	1	0	1	0	0	1	1	6
hsa-miR-3975	MIMAT0019360	TMCC1	23023	NM_001017395	1	1	1	0	0	1	0	0	0	0	1	1	6
hsa-miR-3975	MIMAT0019360	ERP44	23071	NM_015051	0	1	1	0	1	1	0	0	0	0	1	1	6
hsa-miR-3975	MIMAT0019360	TBC1D2B	23102	NM_144572	1	1	1	0	0	1	0	0	0	0	1	1	6
hsa-miR-3975	MIMAT0019360	TNRC6B	23112	XM_005261393	1	1	1	0	0	1	0	0	0	0	1	1	6
hsa-miR-3975	MIMAT0019360	NFASC	23114	XM_005244973	1	1	1	0	0	1	0	0	0	0	1	1	6
hsa-miR-3975	MIMAT0019360	2019-09-08	23176	NM_015146	1	1	1	0	0	1	0	0	0	0	1	1	6
hsa-miR-3975	MIMAT0019360	SULF1	23213	NM_001128205	1	1	1	0	0	1	0	0	0	0	1	1	6
hsa-miR-3975	MIMAT0019360	TSPYL4	23270	NM_021648	1	1	1	0	0	1	0	0	0	0	1	1	6
hsa-miR-3975	MIMAT0019360	CLEC16A	23274	NM_015226	1	1	1	0	0	1	0	0	0	0	1	1	6
hsa-miR-3975	MIMAT0019360	USP22	23326	NM_015276	1	1	0	0	0	1	0	1	0	0	1	1	6
hsa-miR-3975	MIMAT0019360	ANGEL1	23357	XM_005267478	1	1	1	0	0	1	0	0	0	0	1	1	6
hsa-miR-3975	MIMAT0019360	LARS2	23395	NM_015340	1	1	1	0	0	1	0	0	0	0	1	1	6
hsa-miR-3975	MIMAT0019360	CTDNEP1	23399	NM_015343	1	1	0	0	0	1	0	1	0	0	1	1	6
hsa-miR-3975	MIMAT0019360	KAT6B	23522	NM_012330	0	1	1	0	0	1	0	1	0	0	1	1	6
hsa-miR-3975	MIMAT0019360	ARL2BP	23568	NM_012106	1	1	0	0	0	1	0	1	0	0	1	1	6
hsa-miR-3975	MIMAT0019360	NTSR2	23620	NM_012344	1	1	1	0	0	1	0	0	0	0	1	1	6
hsa-miR-3975	MIMAT0019360	BACE2	25825	NM_012105	1	1	1	0	0	1	0	0	0	0	1	1	6
hsa-miR-3975	MIMAT0019360	ZNF385A	25946	NM_015481	0	1	1	0	0	1	0	1	0	0	1	1	6
hsa-miR-3975	MIMAT0019360	DAK	26007	NM_015533	1	1	1	0	0	1	0	0	0	0	1	1	6
hsa-miR-3975	MIMAT0019360	ERC2	26059	XM_005265036	1	1	1	0	0	1	0	0	0	0	1	1	6
hsa-miR-3975	MIMAT0019360	ZBTB20	26137	XM_005247336	1	1	1	0	0	1	0	0	0	0	1	1	6
hsa-miR-3975	MIMAT0019360	TIMM10B	26515	NM_012192	1	1	1	0	0	1	0	0	0	0	1	1	6
hsa-miR-3975	MIMAT0019360	STAU2	27067	NM_001164384	1	1	1	0	0	1	0	0	0	0	1	1	6
hsa-miR-3975	MIMAT0019360	BBC3	27113	NM_014417	0	1	1	0	0	1	0	1	0	0	1	1	6
hsa-miR-3975	MIMAT0019360	CRCP	27297	NM_014478	1	1	1	0	0	1	0	0	0	0	1	1	6
hsa-miR-3975	MIMAT0019360	ZBTB44	29068	XM_005271521	1	1	1	0	0	1	0	0	0	0	1	1	6
hsa-miR-3975	MIMAT0019360	RBM15B	29890	NM_013286	1	1	1	0	0	1	0	0	0	0	1	1	6
hsa-miR-3975	MIMAT0019360	EMR2	30817	NM_013447	1	1	1	0	0	1	0	0	0	0	1	1	6
hsa-miR-3975	MIMAT0019360	RAB14	51552	NM_016322	1	1	1	0	0	1	0	0	0	0	1	1	6
hsa-miR-3975	MIMAT0019360	PEX5L	51555	NM_016559	1	1	1	0	0	1	0	0	0	0	1	1	6
hsa-miR-3975	MIMAT0019360	NT5DC3	51559	NM_001031701	1	1	1	0	0	1	0	0	0	0	1	1	6
hsa-miR-3975	MIMAT0019360	TPPP3	51673	XM_005255979	1	1	1	0	0	1	0	0	0	0	1	1	6
hsa-miR-3975	MIMAT0019360	RAB8B	51762	NM_016530	1	1	0	0	0	1	0	1	0	0	1	1	6
hsa-miR-3975	MIMAT0019360	GPR173	54328	NM_018969	1	1	0	0	0	1	0	1	0	0	1	1	6
hsa-miR-3975	MIMAT0019360	SSH1	54434	XM_005268984	1	1	1	0	0	1	0	0	0	0	1	1	6
hsa-miR-3975	MIMAT0019360	CCSER2	54462	NM_018999	1	1	0	0	0	1	0	1	0	0	1	1	6
hsa-miR-3975	MIMAT0019360	XRN1	54464	NM_019001	1	1	1	0	0	1	0	0	0	0	1	1	6
hsa-miR-3975	MIMAT0019360	CROT	54677	NM_001143935	1	1	0	0	0	1	0	1	0	0	1	1	6
hsa-miR-3975	MIMAT0019360	FBLIM1	54751	XM_005245909	1	1	1	0	0	1	0	0	0	0	1	1	6
hsa-miR-3975	MIMAT0019360	HAUS6	54801	NM_017645	1	1	1	0	0	1	0	0	0	0	1	1	6
hsa-miR-3975	MIMAT0019360	TMEM214	54867	XM_005264381	1	1	1	0	0	1	0	0	0	0	1	1	6
hsa-miR-3975	MIMAT0019360	SLC35F6	54978	XM_005264386	1	1	1	0	0	1	0	0	0	0	1	1	6
hsa-miR-3975	MIMAT0019360	LAMTOR1	55004	NM_017907	1	1	0	0	0	1	0	1	0	0	1	1	6
hsa-miR-3975	MIMAT0019360	USP47	55031	XM_005252997	1	1	1	0	0	1	0	0	0	0	1	1	6
hsa-miR-3975	MIMAT0019360	PTCD3	55037	NM_017952	1	1	1	0	0	1	0	0	0	0	1	1	6
hsa-miR-3975	MIMAT0019360	PDPR	55066	XM_005256016	1	1	1	0	0	1	0	0	0	0	1	1	6
hsa-miR-3975	MIMAT0019360	TMEM33	55161	NM_018126	1	1	1	0	0	1	0	0	0	0	1	1	6
hsa-miR-3975	MIMAT0019360	C14orf105	55195	NM_018168	1	1	1	0	0	1	0	0	0	0	1	1	6
hsa-miR-3975	MIMAT0019360	TMLHE	55217	NM_018196	1	1	1	0	0	1	0	0	0	0	1	1	6
hsa-miR-3975	MIMAT0019360	TMEM19	55266	NM_018279	1	1	1	0	0	1	0	0	0	0	1	1	6
hsa-miR-3975	MIMAT0019360	VPS53	55275	NM_001128159	1	1	1	0	0	1	0	0	0	0	1	1	6
hsa-miR-3975	MIMAT0019360	UBE2W	55284	NM_001001481	1	1	1	0	0	1	0	0	0	0	1	1	6
hsa-miR-3975	MIMAT0019360	2019-09-11	55752	NM_018243	1	1	1	0	0	1	0	0	0	0	1	1	6
hsa-miR-3975	MIMAT0019360	TRERF1	55809	NM_033502	1	1	1	0	0	1	0	0	0	0	1	1	6
hsa-miR-3975	MIMAT0019360	BDP1	55814	NM_018429	1	1	1	0	0	1	0	0	0	0	1	1	6
hsa-miR-3975	MIMAT0019360	MUC13	56667	NM_033049	1	1	1	0	0	1	0	0	0	0	1	1	6
hsa-miR-3975	MIMAT0019360	ENTPD7	57089	NM_020354	1	1	1	0	1	0	0	0	0	0	1	1	6
hsa-miR-3975	MIMAT0019360	RALGAPB	57148	NM_020336	1	1	1	0	0	1	0	0	0	0	1	1	6
hsa-miR-3975	MIMAT0019360	TMEM63C	57156	NM_020431	1	1	1	0	0	1	0	0	0	0	1	1	6
hsa-miR-3975	MIMAT0019360	KIAA1147	57189	NM_001080392	1	1	1	0	0	1	0	0	0	0	1	1	6
hsa-miR-3975	MIMAT0019360	SRGAP1	57522	XM_005269042	1	1	1	0	0	1	0	0	0	0	1	1	6
hsa-miR-3975	MIMAT0019360	NYNRIN	57523	NM_025081	1	1	1	0	0	1	0	0	0	0	1	1	6
hsa-miR-3975	MIMAT0019360	KIAA1328	57536	XM_005258317	1	1	1	0	0	1	0	0	0	0	1	1	6
hsa-miR-3975	MIMAT0019360	WDR35	57539	NM_001006657	1	1	1	0	0	1	0	0	0	0	1	1	6
hsa-miR-3975	MIMAT0019360	EPG5	57724	NM_020964	1	1	1	0	0	1	0	0	0	0	1	1	6
hsa-miR-3975	MIMAT0019360	PIEZO2	63895	NM_022068	1	1	0	0	0	1	0	1	0	0	1	1	6
hsa-miR-3975	MIMAT0019360	POPDC2	64091	XM_005247698	1	1	1	0	0	1	0	0	0	0	1	1	6
hsa-miR-3975	MIMAT0019360	NSD1	64324	NM_022455	1	1	1	0	0	1	0	0	0	0	1	1	6
hsa-miR-3975	MIMAT0019360	SLC13A3	64849	XM_005260513	1	1	1	0	0	1	0	0	0	0	1	1	6
hsa-miR-3975	MIMAT0019360	LPIN3	64900	NM_022896	1	1	0	0	0	1	0	1	0	0	1	1	6
hsa-miR-3975	MIMAT0019360	OTUB2	78990	NM_023112	1	1	1	0	0	1	0	0	0	0	1	1	6
hsa-miR-3975	MIMAT0019360	SECISBP2	79048	NM_024077	1	1	0	0	0	1	0	1	0	0	1	1	6
hsa-miR-3975	MIMAT0019360	ATG9A	79065	XM_005246845	1	1	1	0	0	1	0	0	0	0	1	1	6
hsa-miR-3975	MIMAT0019360	ELOVL6	79071	NM_024090	1	1	1	0	0	1	0	0	0	0	1	1	6
hsa-miR-3975	MIMAT0019360	ATP13A3	79572	NM_024524	1	1	1	0	0	1	0	0	0	0	1	1	6
hsa-miR-3975	MIMAT0019360	C10orf76	79591	NM_024541	1	1	1	0	0	1	0	0	0	0	1	1	6
hsa-miR-3975	MIMAT0019360	FAM57A	79850	NM_024792	1	1	1	0	0	1	0	0	0	0	1	1	6
hsa-miR-3975	MIMAT0019360	MAP9	79884	XM_005263223	1	1	1	0	0	1	0	0	0	0	1	1	6
hsa-miR-3975	MIMAT0019360	CSRNP3	80034	NM_001172173	1	1	1	0	0	1	0	0	0	0	1	1	6
hsa-miR-3975	MIMAT0019360	MAP3K19	80122	NM_025052	1	1	1	0	0	1	0	0	0	0	1	1	6
hsa-miR-3975	MIMAT0019360	NAA15	80155	NM_057175	1	1	1	0	0	1	0	0	0	0	1	1	6
hsa-miR-3975	MIMAT0019360	ORAI2	80228	NM_001271818	1	1	1	0	0	1	0	0	0	0	1	1	6
hsa-miR-3975	MIMAT0019360	C16orf70	80262	NM_025187	1	1	0	0	0	1	0	1	0	0	1	1	6
hsa-miR-3975	MIMAT0019360	CSRNP2	81566	NM_030809	1	1	1	0	0	1	0	0	0	0	1	1	6
hsa-miR-3975	MIMAT0019360	PLA2G12A	81579	NM_030821	1	1	1	0	0	1	0	0	0	0	1	1	6
hsa-miR-3975	MIMAT0019360	SPRY4	81848	XM_005268517	1	1	1	0	0	1	0	0	0	0	1	1	6
hsa-miR-3975	MIMAT0019360	TLN2	83660	XM_005254709	1	1	1	0	0	1	0	0	0	0	1	1	6
hsa-miR-3975	MIMAT0019360	PPP1R1B	84152	NM_032192	1	1	1	0	0	1	0	0	0	0	1	1	6
hsa-miR-3975	MIMAT0019360	ZNF541	84215	XM_005259311	1	1	1	0	0	1	0	0	0	0	1	1	6
hsa-miR-3975	MIMAT0019360	SRRM4	84530	NM_194286	1	1	1	0	0	1	0	0	0	0	1	1	6
hsa-miR-3975	MIMAT0019360	TMEM185A	84548	NM_032508	1	1	1	0	0	1	0	0	0	0	1	1	6
hsa-miR-3975	MIMAT0019360	DGAT2	84649	NM_032564	1	1	0	0	0	1	0	1	0	0	1	1	6
hsa-miR-3975	MIMAT0019360	PRRC2B	84726	XM_005272227	1	1	1	0	0	1	0	0	0	0	1	1	6
hsa-miR-3975	MIMAT0019360	ZC3H10	84872	XM_005269196	1	1	1	0	0	1	0	0	0	0	1	1	6
hsa-miR-3975	MIMAT0019360	AIFM2	84883	XM_005270249	1	1	1	0	0	1	0	0	0	0	1	1	6
hsa-miR-3975	MIMAT0019360	C1orf198	84886	NM_001136494	1	1	1	0	0	1	0	0	0	0	1	1	6
hsa-miR-3975	MIMAT0019360	FRMD5	84978	XM_005254729	1	1	1	0	0	1	0	0	0	0	1	1	6
hsa-miR-3975	MIMAT0019360	GTPBP10	85865	NM_033107	1	1	1	0	0	1	0	0	0	0	1	1	6
hsa-miR-3975	MIMAT0019360	NAV3	89795	XM_005269214	1	1	1	0	0	1	0	0	0	0	1	1	6
hsa-miR-3975	MIMAT0019360	PAPLN	89932	XM_005268185	1	1	1	0	0	1	0	0	0	0	1	1	6
hsa-miR-3975	MIMAT0019360	ISX	91464	NM_001008494	1	1	1	0	0	1	0	0	0	0	1	1	6
hsa-miR-3975	MIMAT0019360	PLXNA4	91584	NM_020911	1	1	1	0	0	1	0	0	0	0	1	1	6
hsa-miR-3975	MIMAT0019360	CHURC1	91612	NM_145165	1	1	1	0	0	1	0	0	0	0	1	1	6
hsa-miR-3975	MIMAT0019360	ELMSAN1	91748	NM_194278	1	1	0	0	0	1	0	1	0	0	1	1	6
hsa-miR-3975	MIMAT0019360	TRMT10A	93587	NM_152292	1	1	1	0	0	1	0	0	0	0	1	1	6
hsa-miR-3975	MIMAT0019360	PIGS	94005	NM_033198	1	1	0	0	0	1	0	1	0	0	1	1	6
hsa-miR-3975	MIMAT0019360	SLAMF6	114836	NM_001184714	1	1	1	0	0	1	0	0	0	0	1	1	6
hsa-miR-3975	MIMAT0019360	C1QTNF2	114898	NM_031908	1	1	1	0	0	1	0	0	0	0	1	1	6
hsa-miR-3975	MIMAT0019360	FBXO32	114907	NM_058229	1	1	0	0	0	1	0	1	0	0	1	1	6
hsa-miR-3975	MIMAT0019360	SLC26A9	115019	NM_052934	1	1	0	0	0	1	0	1	0	0	1	1	6
hsa-miR-3975	MIMAT0019360	ARL11	115761	NM_138450	1	1	1	0	0	1	0	0	0	0	1	1	6
hsa-miR-3975	MIMAT0019360	KLHDC3	116138	NM_057161	1	1	0	0	0	1	0	1	0	0	1	1	6
hsa-miR-3975	MIMAT0019360	FAM122A	116224	NM_138333	1	1	1	0	0	1	0	0	0	0	1	1	6
hsa-miR-3975	MIMAT0019360	MORN4	118812	NM_178832	1	1	1	0	0	1	0	0	0	0	1	1	6
hsa-miR-3975	MIMAT0019360	MSI2	124540	XM_005257014	1	1	1	0	0	1	0	0	0	0	1	1	6
hsa-miR-3975	MIMAT0019360	CYB5D1	124637	NM_144607	1	1	1	0	0	1	0	0	0	0	1	1	6
hsa-miR-3975	MIMAT0019360	ANKRD13B	124930	NM_152345	0	1	1	0	0	1	0	1	0	0	1	1	6
hsa-miR-3975	MIMAT0019360	AFAP1L1	134265	NM_152406	1	1	1	0	0	1	0	0	0	0	1	1	6
hsa-miR-3975	MIMAT0019360	RIMS4	140730	NM_001205317	1	1	1	0	0	1	0	0	0	0	1	1	6
hsa-miR-3975	MIMAT0019360	MACROD2	140733	XM_005260667	1	1	1	0	0	1	0	0	0	0	1	1	6
hsa-miR-3975	MIMAT0019360	TRPM6	140803	NM_017662	1	1	0	0	0	1	0	1	0	0	1	1	6
hsa-miR-3975	MIMAT0019360	FGFBP3	143282	NM_152429	1	1	1	0	0	1	0	0	0	0	1	1	6
hsa-miR-3975	MIMAT0019360	TMEM120B	144404	NM_001080825	1	1	1	0	0	1	0	0	0	0	1	1	6
hsa-miR-3975	MIMAT0019360	GLT1D1	144423	XM_005253553	1	1	1	0	0	1	0	0	0	0	1	1	6
hsa-miR-3975	MIMAT0019360	C12orf66	144577	XM_005268677	1	1	1	0	0	1	0	0	0	0	1	1	6
hsa-miR-3975	MIMAT0019360	CMTM4	146223	NM_181521	1	1	0	0	0	1	0	1	0	0	1	1	6
hsa-miR-3975	MIMAT0019360	TOM1L2	146691	XM_005256461	1	1	1	0	0	1	0	0	0	0	1	1	6
hsa-miR-3975	MIMAT0019360	FBXO41	150726	NM_001080410	1	1	1	0	0	1	0	0	0	0	1	1	6
hsa-miR-3975	MIMAT0019360	TDRP	157695	NM_175075	1	1	1	0	0	1	0	0	0	0	1	1	6
hsa-miR-3975	MIMAT0019360	TTLL11	158135	XM_005251728	1	1	1	0	0	1	0	0	0	0	1	1	6
hsa-miR-3975	MIMAT0019360	PRUNE2	158471	XM_005251745	1	1	1	0	0	1	0	0	0	0	1	1	6
hsa-miR-3975	MIMAT0019360	ZXDB	158586	NM_007157	1	1	1	0	0	1	0	0	0	0	1	1	6
hsa-miR-3975	MIMAT0019360	GPR180	160897	NM_180989	1	1	1	0	0	1	0	0	0	0	1	1	6
hsa-miR-3975	MIMAT0019360	EML5	161436	XM_005267387	1	1	1	0	0	1	0	0	0	0	1	1	6
hsa-miR-3975	MIMAT0019360	ITPRIPL2	162073	NM_001034841	1	1	1	0	0	1	0	0	0	0	1	1	6
hsa-miR-3975	MIMAT0019360	LONRF2	164832	NM_198461	1	1	1	0	0	1	0	0	0	0	1	1	6
hsa-miR-3975	MIMAT0019360	MMAA	166785	NM_172250	1	1	1	0	0	1	0	0	0	0	1	1	6
hsa-miR-3975	MIMAT0019360	MIER3	166968	NM_152622	0	1	1	0	0	1	0	1	0	0	1	1	6
hsa-miR-3975	MIMAT0019360	SLC30A8	169026	NM_001172813	1	1	1	0	0	1	0	0	0	0	1	1	6
hsa-miR-3975	MIMAT0019360	OLFML2A	169611	NM_182487	1	1	1	0	0	1	0	0	0	0	1	1	6
hsa-miR-3975	MIMAT0019360	GLIS3	169792	NM_001042413	1	1	1	0	0	1	0	0	0	0	1	1	6
hsa-miR-3975	MIMAT0019360	ADAMTS19	171019	NM_133638	1	1	1	0	0	1	0	0	0	0	1	1	6
hsa-miR-3975	MIMAT0019360	ZCCHC24	219654	NM_153367	0	1	1	0	1	1	0	0	0	0	1	1	6
hsa-miR-3975	MIMAT0019360	SLC16A9	220963	NM_194298	1	1	1	0	0	1	0	0	0	0	1	1	6
hsa-miR-3975	MIMAT0019360	REEP3	221035	NM_001001330	1	1	1	0	0	1	0	0	0	0	1	1	6
hsa-miR-3975	MIMAT0019360	CADM2	253559	NM_001167674	1	1	0	0	0	1	0	1	0	0	1	1	6
hsa-miR-3975	MIMAT0019360	MSRB3	253827	NM_001193460	1	1	1	0	0	1	0	0	0	0	1	1	6
hsa-miR-3975	MIMAT0019360	UBN2	254048	XM_005250248	1	1	1	0	0	1	0	0	0	0	1	1	6
hsa-miR-3975	MIMAT0019360	SLC41A1	254428	NM_173854	1	1	1	0	0	1	0	0	0	0	1	1	6
hsa-miR-3975	MIMAT0019360	MDGA1	266727	NM_153487	1	1	1	0	0	1	0	0	0	0	1	1	6
hsa-miR-3975	MIMAT0019360	KSR2	283455	NM_173598	1	1	1	0	0	1	0	0	0	0	1	1	6
hsa-miR-3975	MIMAT0019360	NWD1	284434	NM_001007525	1	1	1	0	0	1	0	0	0	0	1	1	6
hsa-miR-3975	MIMAT0019360	YIPF6	286451	NM_173834	1	1	1	0	0	1	0	0	0	0	1	1	6
hsa-miR-3975	MIMAT0019360	ABCB5	340273	NM_001163941	1	1	1	0	0	1	0	0	0	0	1	1	6
hsa-miR-3975	MIMAT0019360	NANOS1	340719	NM_199461	1	1	1	0	0	1	0	0	0	0	1	1	6
hsa-miR-3975	MIMAT0019360	KRT77	374454	XM_005268853	1	1	1	0	0	1	0	0	0	0	1	1	6
hsa-miR-3975	MIMAT0019360	PEAR1	375033	NM_001080471	1	1	1	0	0	1	0	0	0	0	1	1	6
hsa-miR-3975	MIMAT0019360	C1orf95	375057	NM_001003665	1	1	1	0	0	1	0	0	0	0	1	1	6
hsa-miR-3975	MIMAT0019360	FAM102A	399665	NM_001035254	1	1	0	0	0	1	0	1	0	0	1	1	6
hsa-miR-3975	MIMAT0019360	PAIP2B	400961	NM_020459	1	1	1	0	0	1	0	0	0	0	1	1	6
hsa-miR-3975	MIMAT0019360	ZBTB34	403341	XM_005251989	1	1	1	0	0	1	0	0	0	0	1	1	6
hsa-miR-3975	MIMAT0019360	C10orf105	414152	NM_001164375	1	1	1	0	0	1	0	0	0	0	1	1	6
hsa-miR-3975	MIMAT0019360	RNASE13	440163	NM_001012264	1	1	1	0	0	1	0	0	0	0	1	1	6
hsa-miR-3975	MIMAT0019360	CAPN14	440854	NM_001145122	1	1	1	0	0	1	0	0	0	0	1	1	6
hsa-miR-3975	MIMAT0019360	RNF222	643904	NM_001146684	1	1	0	0	0	1	0	1	0	0	1	1	6
hsa-miR-3975	MIMAT0019360	FAM227A	646851	NM_001013647	1	1	1	0	0	1	0	0	0	0	1	1	6
hsa-miR-3975	MIMAT0019360	ACTG1	71	NM_001614	1	0	1	0	0	1	0	1	0	0	1	1	6
hsa-miR-3975	MIMAT0019360	ARNT	405	NM_001197325	1	0	1	0	0	1	0	1	0	0	1	1	6
hsa-miR-3975	MIMAT0019360	ARNT	405	NM_178427	1	0	1	0	0	1	0	1	0	0	1	1	6
hsa-miR-3975	MIMAT0019360	ATP1B3	483	NM_001679	1	0	1	0	1	1	0	0	0	0	1	1	6
hsa-miR-3975	MIMAT0019360	ATP6V1G2	534	NM_130463	1	0	1	0	1	1	0	0	0	0	1	1	6
hsa-miR-3975	MIMAT0019360	ATP6V1G2	534	NM_138282	1	0	1	0	1	1	0	0	0	0	1	1	6
hsa-miR-3975	MIMAT0019360	ATP6V1G2	534	NM_001204078	1	0	1	0	1	1	0	0	0	0	1	1	6
hsa-miR-3975	MIMAT0019360	KRIT1	889	NM_194455	1	0	1	0	1	1	0	0	0	0	1	1	6
hsa-miR-3975	MIMAT0019360	KRIT1	889	NM_001013406	1	0	1	0	1	1	0	0	0	0	1	1	6
hsa-miR-3975	MIMAT0019360	KRIT1	889	NM_194454	1	0	1	0	1	1	0	0	0	0	1	1	6
hsa-miR-3975	MIMAT0019360	KRIT1	889	NM_194456	1	0	1	0	1	1	0	0	0	0	1	1	6
hsa-miR-3975	MIMAT0019360	KRIT1	889	NM_004912	1	0	1	0	1	1	0	0	0	0	1	1	6
hsa-miR-3975	MIMAT0019360	CLCN5	1184	NM_000084	1	0	1	0	1	1	0	0	0	0	1	1	6
hsa-miR-3975	MIMAT0019360	CLCN5	1184	NM_001127898	1	0	1	0	1	1	0	0	0	0	1	1	6
hsa-miR-3975	MIMAT0019360	CRY2	1408	NM_001127457	1	0	1	0	0	1	0	1	0	0	1	1	6
hsa-miR-3975	MIMAT0019360	EIF4B	1975	NM_001417	1	0	1	0	1	1	0	0	0	0	1	1	6
hsa-miR-3975	MIMAT0019360	EPS15	2060	NM_001159969	1	0	1	0	1	1	0	0	0	0	1	1	6
hsa-miR-3975	MIMAT0019360	EPS15	2060	NM_001981	1	0	1	0	1	1	0	0	0	0	1	1	6
hsa-miR-3975	MIMAT0019360	GSR	2936	NM_001195104	1	0	1	0	1	1	0	0	0	0	1	1	6
hsa-miR-3975	MIMAT0019360	GSR	2936	NM_001195103	1	0	1	0	1	1	0	0	0	0	1	1	6
hsa-miR-3975	MIMAT0019360	GSR	2936	NM_001195102	1	0	1	0	1	1	0	0	0	0	1	1	6
hsa-miR-3975	MIMAT0019360	INSR	3643	NM_001079817	1	0	1	0	1	1	0	0	0	0	1	1	6
hsa-miR-3975	MIMAT0019360	KCNA6	3742	NM_002235	1	0	1	0	1	1	0	0	0	0	1	1	6
hsa-miR-3975	MIMAT0019360	SMAD2	4087	NM_001003652	1	0	1	0	1	1	0	0	0	0	1	1	6
hsa-miR-3975	MIMAT0019360	SMAD2	4087	NM_005901	1	0	1	0	1	1	0	0	0	0	1	1	6
hsa-miR-3975	MIMAT0019360	SMAD2	4087	NM_001135937	1	0	1	0	1	1	0	0	0	0	1	1	6
hsa-miR-3975	MIMAT0019360	MGAT5	4249	NM_002410	1	0	1	0	0	1	0	1	0	0	1	1	6
hsa-miR-3975	MIMAT0019360	MUC7	4589	NM_152291	1	0	1	0	0	1	0	1	0	0	1	1	6
hsa-miR-3975	MIMAT0019360	MUC7	4589	NM_001145007	1	0	1	0	0	1	0	1	0	0	1	1	6
hsa-miR-3975	MIMAT0019360	NT5E	4907	NM_002526	1	0	1	0	1	1	0	0	0	0	1	1	6
hsa-miR-3975	MIMAT0019360	NT5E	4907	NM_001204813	1	0	1	0	1	1	0	0	0	0	1	1	6
hsa-miR-3975	MIMAT0019360	PDE4D	5144	NM_001197223	1	0	1	0	0	1	0	1	0	0	1	1	6
hsa-miR-3975	MIMAT0019360	PDE4D	5144	NM_001197221	1	0	1	0	0	1	0	1	0	0	1	1	6
hsa-miR-3975	MIMAT0019360	PDE4D	5144	NM_001197219	1	0	1	0	0	1	0	1	0	0	1	1	6
hsa-miR-3975	MIMAT0019360	PDE4D	5144	NM_006203	1	0	1	0	0	1	0	1	0	0	1	1	6
hsa-miR-3975	MIMAT0019360	PDE4D	5144	NM_001197222	1	0	1	0	0	1	0	1	0	0	1	1	6
hsa-miR-3975	MIMAT0019360	PDE4D	5144	NM_001197218	1	0	1	0	0	1	0	1	0	0	1	1	6
hsa-miR-3975	MIMAT0019360	PDE4D	5144	NM_001165899	1	0	1	0	0	1	0	1	0	0	1	1	6
hsa-miR-3975	MIMAT0019360	PDE4D	5144	NM_001104631	1	0	1	0	0	1	0	1	0	0	1	1	6
hsa-miR-3975	MIMAT0019360	PDE4D	5144	NM_001197220	1	0	1	0	0	1	0	1	0	0	1	1	6
hsa-miR-3975	MIMAT0019360	PTGFR	5737	NM_000959	1	0	1	0	1	1	0	0	0	0	1	1	6
hsa-miR-3975	MIMAT0019360	PTPRF	5792	NM_130440	1	0	1	0	0	1	0	1	0	0	1	1	6
hsa-miR-3975	MIMAT0019360	PTPRF	5792	NM_002840	1	0	1	0	0	1	0	1	0	0	1	1	6
hsa-miR-3975	MIMAT0019360	SLC15A2	6565	NM_021082	1	0	1	0	1	1	0	0	0	0	1	1	6
hsa-miR-3975	MIMAT0019360	SLC15A2	6565	NM_001145998	1	0	1	0	1	1	0	0	0	0	1	1	6
hsa-miR-3975	MIMAT0019360	SRPK2	6733	NM_182692	1	0	1	0	1	1	0	0	0	0	1	1	6
hsa-miR-3975	MIMAT0019360	SRPK2	6733	NM_182691	1	0	1	0	1	1	0	0	0	0	1	1	6
hsa-miR-3975	MIMAT0019360	STK10	6793	NM_005990	1	0	1	0	0	1	0	1	0	0	1	1	6
hsa-miR-3975	MIMAT0019360	UQCRB	7381	NM_006294	1	0	1	0	1	1	0	0	0	0	1	1	6
hsa-miR-3975	MIMAT0019360	UQCRB	7381	NM_001199975	1	0	1	0	1	1	0	0	0	0	1	1	6
hsa-miR-3975	MIMAT0019360	USP7	7874	NM_003470	1	0	1	0	1	1	0	0	0	0	1	1	6
hsa-miR-3975	MIMAT0019360	TNKS	8658	NM_003747	1	0	1	0	0	1	0	1	0	0	1	1	6
hsa-miR-3975	MIMAT0019360	PER3	8863	NM_016831	1	0	1	0	1	1	0	0	0	0	1	1	6
hsa-miR-3975	MIMAT0019360	GOSR2	9570	NM_001012511	1	0	1	0	1	1	0	0	0	0	1	1	6
hsa-miR-3975	MIMAT0019360	CLOCK	9575	NM_004898	1	0	1	0	0	1	0	1	0	0	1	1	6
hsa-miR-3975	MIMAT0019360	MAGI2	9863	NM_012301	1	0	1	0	0	1	0	1	0	0	1	1	6
hsa-miR-3975	MIMAT0019360	ZBTB18	10472	NM_205768	1	0	1	0	0	1	0	1	0	0	1	1	6
hsa-miR-3975	MIMAT0019360	POLR3G	10622	NM_006467	1	0	1	0	1	1	0	0	0	0	1	1	6
hsa-miR-3975	MIMAT0019360	NRG3	10718	NM_001010848	1	0	1	0	1	1	0	0	0	0	1	1	6
hsa-miR-3975	MIMAT0019360	NRG3	10718	NM_001165973	1	0	1	0	1	1	0	0	0	0	1	1	6
hsa-miR-3975	MIMAT0019360	NRG3	10718	NM_001165972	1	0	1	0	1	1	0	0	0	0	1	1	6
hsa-miR-3975	MIMAT0019360	NFAT5	10725	NM_006599	1	0	1	0	0	1	0	1	0	0	1	1	6
hsa-miR-3975	MIMAT0019360	NFAT5	10725	NM_001113178	1	0	1	0	0	1	0	1	0	0	1	1	6
hsa-miR-3975	MIMAT0019360	NFAT5	10725	NM_138713	1	0	1	0	0	1	0	1	0	0	1	1	6
hsa-miR-3975	MIMAT0019360	NFAT5	10725	NM_173214	1	0	1	0	0	1	0	1	0	0	1	1	6
hsa-miR-3975	MIMAT0019360	NFAT5	10725	NM_138714	1	0	1	0	0	1	0	1	0	0	1	1	6
hsa-miR-3975	MIMAT0019360	BAHD1	22893	NM_014952	1	0	1	0	0	1	0	1	0	0	1	1	6
hsa-miR-3975	MIMAT0019360	TNRC6B	23112	NM_001024843	1	0	1	0	0	1	0	1	0	0	1	1	6
hsa-miR-3975	MIMAT0019360	TNRC6B	23112	NM_015088	1	0	1	0	0	1	0	1	0	0	1	1	6
hsa-miR-3975	MIMAT0019360	TNRC6B	23112	NM_001162501	1	0	1	0	0	1	0	1	0	0	1	1	6
hsa-miR-3975	MIMAT0019360	CLEC5A	23601	NM_013252	1	0	1	0	1	1	0	0	0	0	1	1	6
hsa-miR-3975	MIMAT0019360	ERC2	26059	NM_015576	1	0	1	0	1	1	0	0	0	0	1	1	6
hsa-miR-3975	MIMAT0019360	ZBTB44	29068	NM_014155	1	0	1	0	1	1	0	0	0	0	1	1	6
hsa-miR-3975	MIMAT0019360	ASAP1	50807	NM_018482	1	0	1	0	1	1	0	0	0	0	1	1	6
hsa-miR-3975	MIMAT0019360	TUBE1	51175	NM_016262	1	0	1	0	1	1	0	0	0	0	1	1	6
hsa-miR-3975	MIMAT0019360	CLDN18	51208	NM_001002026	1	0	1	0	1	1	0	0	0	0	1	1	6
hsa-miR-3975	MIMAT0019360	KLF3	51274	NM_016531	1	0	1	0	1	1	0	0	0	0	1	1	6
hsa-miR-3975	MIMAT0019360	ZNF589	51385	NM_016089	1	0	1	0	1	1	0	0	0	0	1	1	6
hsa-miR-3975	MIMAT0019360	FBLIM1	54751	NM_001024216	1	0	1	0	1	1	0	0	0	0	1	1	6
hsa-miR-3975	MIMAT0019360	FBLIM1	54751	NM_017556	1	0	1	0	1	1	0	0	0	0	1	1	6
hsa-miR-3975	MIMAT0019360	ZNF770	54989	NM_014106	1	0	1	0	1	1	0	0	0	0	1	1	6
hsa-miR-3975	MIMAT0019360	PDPR	55066	NM_017990	1	0	1	0	1	1	0	0	0	0	1	1	6
hsa-miR-3975	MIMAT0019360	FBXW7	55294	NM_001013415	1	0	1	0	0	1	0	1	0	0	1	1	6
hsa-miR-3975	MIMAT0019360	FBXW7	55294	NM_018315	1	0	1	0	0	1	0	1	0	0	1	1	6
hsa-miR-3975	MIMAT0019360	BCAP29	55973	NM_018844	1	0	1	0	1	1	0	0	0	0	1	1	6
hsa-miR-3975	MIMAT0019360	PHTF2	57157	NM_020432	1	0	1	0	0	1	0	1	0	0	1	1	6
hsa-miR-3975	MIMAT0019360	PHTF2	57157	NM_001127357	1	0	1	0	0	1	0	1	0	0	1	1	6
hsa-miR-3975	MIMAT0019360	KIAA1522	57648	NM_001198973	1	0	1	0	0	1	0	1	0	0	1	1	6
hsa-miR-3975	MIMAT0019360	KIAA1522	57648	NM_001198972	1	0	1	0	0	1	0	1	0	0	1	1	6
hsa-miR-3975	MIMAT0019360	NXN	64359	NM_022463	1	0	1	0	1	1	0	0	0	0	1	1	6
hsa-miR-3975	MIMAT0019360	NXN	64359	NM_001205319	1	0	1	0	1	1	0	0	0	0	1	1	6
hsa-miR-3975	MIMAT0019360	NMNAT1	64802	NM_022787	1	0	1	0	1	1	0	0	0	0	1	1	6
hsa-miR-3975	MIMAT0019360	SLC26A6	65010	NM_001040454	1	0	1	0	1	1	0	0	0	0	1	1	6
hsa-miR-3975	MIMAT0019360	SLC26A6	65010	NM_134426	1	0	1	0	1	1	0	0	0	0	1	1	6
hsa-miR-3975	MIMAT0019360	SLC26A6	65010	NM_134263	1	0	1	0	1	1	0	0	0	0	1	1	6
hsa-miR-3975	MIMAT0019360	SLC26A6	65010	NM_022911	1	0	1	0	1	1	0	0	0	0	1	1	6
hsa-miR-3975	MIMAT0019360	ZBTB10	65986	NM_023929	1	0	1	0	1	1	0	0	0	0	1	1	6
hsa-miR-3975	MIMAT0019360	MAGT1	84061	NM_032121	1	0	1	0	1	1	0	0	0	0	1	1	6
hsa-miR-3975	MIMAT0019360	RERG	85004	NM_001190726	1	0	1	0	1	1	0	0	0	0	1	1	6
hsa-miR-3975	MIMAT0019360	NAV3	89795	NM_014903	1	0	1	0	0	1	0	1	0	0	1	1	6
hsa-miR-3975	MIMAT0019360	CDHR1	92211	NM_033100	1	0	1	0	1	1	0	0	0	0	1	1	6
hsa-miR-3975	MIMAT0019360	MGME1	92667	NM_052865	1	0	1	0	1	1	0	0	0	0	1	1	6
hsa-miR-3975	MIMAT0019360	ERI2	112479	NM_001142725	1	0	1	0	1	1	0	0	0	0	1	1	6
hsa-miR-3975	MIMAT0019360	ZBED6CL	113763	NM_138434	1	0	1	0	1	1	0	0	0	0	1	1	6
hsa-miR-3975	MIMAT0019360	MBD6	114785	NM_052897	1	0	1	0	1	1	0	0	0	0	1	1	6
hsa-miR-3975	MIMAT0019360	KRTAP13-1	140258	NM_181599	1	0	1	0	1	1	0	0	0	0	1	1	6
hsa-miR-3975	MIMAT0019360	GLT1D1	144423	NM_144669	1	0	1	0	1	1	0	0	0	0	1	1	6
hsa-miR-3975	MIMAT0019360	RUNDC1	146923	NM_173079	1	0	1	0	1	1	0	0	0	0	1	1	6
hsa-miR-3975	MIMAT0019360	ZNF555	148254	NM_152791	1	0	1	0	1	1	0	0	0	0	1	1	6
hsa-miR-3975	MIMAT0019360	ZNF555	148254	NM_001172775	1	0	1	0	1	1	0	0	0	0	1	1	6
hsa-miR-3975	MIMAT0019360	SLC30A7	148867	NM_001144884	1	0	1	0	1	1	0	0	0	0	1	1	6
hsa-miR-3975	MIMAT0019360	KANSL1L	151050	NM_152519	1	0	1	0	1	1	0	0	0	0	1	1	6
hsa-miR-3975	MIMAT0019360	TRMT10B	158234	NM_144964	1	0	1	0	1	1	0	0	0	0	1	1	6
hsa-miR-3975	MIMAT0019360	PRUNE2	158471	NM_015225	1	0	1	0	1	1	0	0	0	0	1	1	6
hsa-miR-3975	MIMAT0019360	LIX1	167410	NM_153234	1	0	1	0	1	1	0	0	0	0	1	1	6
hsa-miR-3975	MIMAT0019360	MYO1H	283446	NM_001101421	1	0	1	0	1	1	0	0	0	0	1	1	6
hsa-miR-3975	MIMAT0019360	CERKL	375298	NM_001030311	1	0	1	0	1	1	0	0	0	0	1	1	6
hsa-miR-3975	MIMAT0019360	CERKL	375298	NM_001030312	1	0	1	0	1	1	0	0	0	0	1	1	6
hsa-miR-3975	MIMAT0019360	CERKL	375298	NM_001030313	1	0	1	0	1	1	0	0	0	0	1	1	6
hsa-miR-3975	MIMAT0019360	CERKL	375298	NM_001160277	1	0	1	0	1	1	0	0	0	0	1	1	6
hsa-miR-3975	MIMAT0019360	CERKL	375298	NM_201548	1	0	1	0	1	1	0	0	0	0	1	1	6
hsa-miR-3975	MIMAT0019360	AOC1	26	XM_005249968	1	1	0	0	0	1	0	0	0	0	1	1	5
hsa-miR-3975	MIMAT0019360	ABL2	27	NM_007314	1	1	0	0	0	1	0	0	0	0	1	1	5
hsa-miR-3975	MIMAT0019360	ABR	29	NM_001159746	1	1	0	0	0	1	0	0	0	0	1	1	5
hsa-miR-3975	MIMAT0019360	ACACA	31	NM_198839	1	1	0	0	0	1	0	0	0	0	1	1	5
hsa-miR-3975	MIMAT0019360	ACVR1B	91	NM_020328	0	1	1	0	0	1	0	0	0	0	1	1	5
hsa-miR-3975	MIMAT0019360	ACVRL1	94	XM_005269235	0	1	1	0	0	1	0	0	0	0	1	1	5
hsa-miR-3975	MIMAT0019360	ADCYAP1R1	117	NM_001199635	1	1	0	0	0	1	0	0	0	0	1	1	5
hsa-miR-3975	MIMAT0019360	ADPRH	141	XM_005247126	0	1	1	0	0	1	0	0	0	0	1	1	5
hsa-miR-3975	MIMAT0019360	AK2	204	XM_005270603	1	1	0	0	0	1	0	0	0	0	1	1	5
hsa-miR-3975	MIMAT0019360	AKT2	208	NM_001626	1	1	0	0	0	1	0	0	0	0	1	1	5
hsa-miR-3975	MIMAT0019360	ALOX15B	247	NM_001141	1	1	0	0	0	1	0	0	0	0	1	1	5
hsa-miR-3975	MIMAT0019360	ANK2	287	XM_005262941	1	1	0	0	0	1	0	0	0	0	1	1	5
hsa-miR-3975	MIMAT0019360	ANXA13	312	NM_001003954	1	1	0	0	0	1	0	0	0	0	1	1	5
hsa-miR-3975	MIMAT0019360	APAF1	317	NM_181861	1	1	0	0	0	1	0	0	0	0	1	1	5
hsa-miR-3975	MIMAT0019360	APBA1	320	NM_001163	1	1	0	0	0	1	0	0	0	0	1	1	5
hsa-miR-3975	MIMAT0019360	APLP2	334	NM_001642	1	1	0	0	0	1	0	0	0	0	1	1	5
hsa-miR-3975	MIMAT0019360	ARHGAP1	392	NM_004308	0	1	1	0	0	1	0	0	0	0	1	1	5
hsa-miR-3975	MIMAT0019360	ASTN1	460	NM_004319	1	1	0	0	0	1	0	0	0	0	1	1	5
hsa-miR-3975	MIMAT0019360	ATP2B3	492	XM_005274692	1	1	0	0	0	1	0	0	0	0	1	1	5
hsa-miR-3975	MIMAT0019360	ATP2B3	492	XM_005277859	1	1	0	0	0	1	0	0	0	0	1	1	5
hsa-miR-3975	MIMAT0019360	AVPR2	554	NM_001146151	1	1	0	0	0	1	0	0	0	0	1	1	5
hsa-miR-3975	MIMAT0019360	BCL2	596	NM_000633	1	1	0	0	0	1	0	0	0	0	1	1	5
hsa-miR-3975	MIMAT0019360	CAPN5	726	XM_005274206	1	1	0	0	0	1	0	0	0	0	1	1	5
hsa-miR-3975	MIMAT0019360	CAPN5	726	XM_005277729	1	1	0	0	0	1	0	0	0	0	1	1	5
hsa-miR-3975	MIMAT0019360	OSGIN2	734	NM_001126111	1	1	0	0	0	1	0	0	0	0	1	1	5
hsa-miR-3975	MIMAT0019360	CA12	771	XM_005254655	1	1	1	0	0	0	0	0	0	0	1	1	5
hsa-miR-3975	MIMAT0019360	CACNA2D1	781	XM_005250569	1	1	0	0	0	1	0	0	0	0	1	1	5
hsa-miR-3975	MIMAT0019360	CALD1	800	NM_033138	0	1	1	0	0	1	0	0	0	0	1	1	5
hsa-miR-3975	MIMAT0019360	CAMK2A	815	NM_015981	1	1	0	0	0	1	0	0	0	0	1	1	5
hsa-miR-3975	MIMAT0019360	CAMK2D	817	NM_001221	1	1	0	0	0	1	0	0	0	0	1	1	5
hsa-miR-3975	MIMAT0019360	RUNX1	861	NM_001001890	1	1	0	0	0	1	0	0	0	0	1	1	5
hsa-miR-3975	MIMAT0019360	RUNX3	864	NM_001031680	1	1	0	0	0	1	0	0	0	0	1	1	5
hsa-miR-3975	MIMAT0019360	CCNF	899	NM_001761	1	1	0	0	0	1	0	0	0	0	1	1	5
hsa-miR-3975	MIMAT0019360	CCNG1	900	NM_004060	1	1	0	0	0	1	0	0	0	0	1	1	5
hsa-miR-3975	MIMAT0019360	CD86	942	XM_005247905	0	1	1	0	0	1	0	0	0	0	1	1	5
hsa-miR-3975	MIMAT0019360	CD40LG	959	NM_000074	1	1	0	0	0	1	0	0	0	0	1	1	5
hsa-miR-3975	MIMAT0019360	CDK2	1017	NM_001798	0	1	1	0	0	1	0	0	0	0	1	1	5
hsa-miR-3975	MIMAT0019360	CDX1	1044	NM_001804	1	1	0	0	0	1	0	0	0	0	1	1	5
hsa-miR-3975	MIMAT0019360	CEL	1056	XM_005272155	1	1	0	0	0	1	0	0	0	0	1	1	5
hsa-miR-3975	MIMAT0019360	CENPB	1059	NM_001810	1	1	0	0	0	1	0	0	0	0	1	1	5
hsa-miR-3975	MIMAT0019360	CHD3	1107	XM_005256427	1	1	0	0	0	1	0	0	0	0	1	1	5
hsa-miR-3975	MIMAT0019360	CHI3L1	1116	XM_005244857	1	1	0	0	0	1	0	0	0	0	1	1	5
hsa-miR-3975	MIMAT0019360	CHM	1121	NM_000390	0	1	1	0	0	1	0	0	0	0	1	1	5
hsa-miR-3975	MIMAT0019360	CHRM1	1128	NM_000738	1	1	0	0	0	1	0	0	0	0	1	1	5
hsa-miR-3975	MIMAT0019360	CHRNB2	1141	NM_000748	0	1	1	0	0	1	0	0	0	0	1	1	5
hsa-miR-3975	MIMAT0019360	CISH	1154	XM_005264846	1	1	0	0	0	1	0	0	0	0	1	1	5
hsa-miR-3975	MIMAT0019360	CCR5	1234	NM_000579	1	1	0	0	0	1	0	0	0	0	1	1	5
hsa-miR-3975	MIMAT0019360	ACKR2	1238	XM_005264858	0	1	1	0	0	1	0	0	0	0	1	1	5
hsa-miR-3975	MIMAT0019360	CNGA3	1261	NM_001298	1	1	0	0	0	1	0	0	0	0	1	1	5
hsa-miR-3975	MIMAT0019360	COL12A1	1303	NM_004370	1	1	0	0	0	1	0	0	0	0	1	1	5
hsa-miR-3975	MIMAT0019360	CR2	1380	NM_001006658	1	1	0	0	0	1	0	0	0	0	1	1	5
hsa-miR-3975	MIMAT0019360	ATF2	1386	NM_001256090	1	1	0	0	0	1	0	0	0	0	1	1	5
hsa-miR-3975	MIMAT0019360	CRKL	1399	NM_005207	1	1	0	0	0	1	0	0	0	0	1	1	5
hsa-miR-3975	MIMAT0019360	CRY1	1407	NM_004075	0	1	1	0	0	1	0	0	0	0	1	1	5
hsa-miR-3975	MIMAT0019360	CSNK1E	1454	XM_005261344	1	1	0	0	0	1	0	0	0	0	1	1	5
hsa-miR-3975	MIMAT0019360	CSRP1	1465	NM_001193571	0	1	1	0	0	1	0	0	0	0	1	1	5
hsa-miR-3975	MIMAT0019360	CTNND1	1500	NM_001085458	1	1	0	0	0	1	0	0	0	0	1	1	5
hsa-miR-3975	MIMAT0019360	CTRB1	1504	NM_001906	1	1	0	0	0	1	0	0	0	0	1	1	5
hsa-miR-3975	MIMAT0019360	CYP2B6	1555	NM_000767	0	1	1	0	0	1	0	0	0	0	1	1	5
hsa-miR-3975	MIMAT0019360	DAB1	1600	XM_005270542	1	1	0	0	0	1	0	0	0	0	1	1	5
hsa-miR-3975	MIMAT0019360	DCTD	1635	XM_005262780	1	1	0	0	0	1	0	0	0	0	1	1	5
hsa-miR-3975	MIMAT0019360	DDX6	1656	NM_004397	1	1	1	0	0	0	0	0	0	0	1	1	5
hsa-miR-3975	MIMAT0019360	DES	1674	NM_001927	1	1	0	0	0	1	0	0	0	0	1	1	5
hsa-miR-3975	MIMAT0019360	DHCR24	1718	NM_014762	1	1	0	0	0	1	0	0	0	0	1	1	5
hsa-miR-3975	MIMAT0019360	CYB5R3	1727	NM_001129819	0	1	1	0	0	1	0	0	0	0	1	1	5
hsa-miR-3975	MIMAT0019360	DKC1	1736	NM_001363	1	1	0	0	0	1	0	0	0	0	1	1	5
hsa-miR-3975	MIMAT0019360	DLST	1743	NM_001933	0	1	1	0	0	1	0	0	0	0	1	1	5
hsa-miR-3975	MIMAT0019360	DNM1	1759	XM_005251768	1	1	0	0	0	1	0	0	0	0	1	1	5
hsa-miR-3975	MIMAT0019360	DNM1	1759	XM_005251769	1	1	0	0	0	1	0	0	0	0	1	1	5
hsa-miR-3975	MIMAT0019360	DPAGT1	1798	XM_005271423	1	1	0	0	0	1	0	0	0	0	1	1	5
hsa-miR-3975	MIMAT0019360	DPYSL2	1808	NM_001197293	1	1	0	0	0	1	0	0	0	0	1	1	5
hsa-miR-3975	MIMAT0019360	DRD2	1813	NM_000795	1	1	0	0	0	1	0	0	0	0	1	1	5
hsa-miR-3975	MIMAT0019360	DTNA	1837	NM_032975	1	1	0	0	0	1	0	0	0	0	1	1	5
hsa-miR-3975	MIMAT0019360	DUSP4	1846	NM_057158	1	1	0	0	0	1	0	0	0	0	1	1	5
hsa-miR-3975	MIMAT0019360	DUSP7	1849	NM_001947	1	1	0	0	0	1	0	0	0	0	1	1	5
hsa-miR-3975	MIMAT0019360	DVL3	1857	NM_004423	1	1	0	0	0	1	0	0	0	0	1	1	5
hsa-miR-3975	MIMAT0019360	E2F2	1870	NM_004091	1	1	0	0	0	1	0	0	0	0	1	1	5
hsa-miR-3975	MIMAT0019360	ECT2	1894	XM_005247175	1	1	0	0	0	1	0	0	0	0	1	1	5
hsa-miR-3975	MIMAT0019360	EDN1	1906	NM_001955	0	1	1	0	0	1	0	0	0	0	1	1	5
hsa-miR-3975	MIMAT0019360	PHC2	1912	XM_005270569	1	1	0	0	0	1	0	0	0	0	1	1	5
hsa-miR-3975	MIMAT0019360	EFNA1	1942	XM_005244940	1	1	0	0	0	1	0	0	0	0	1	1	5
hsa-miR-3975	MIMAT0019360	EFNA5	1946	NM_001962	1	1	0	0	0	1	0	0	0	0	1	1	5
hsa-miR-3975	MIMAT0019360	MEGF8	1954	NM_001271938	1	1	0	0	0	1	0	0	0	0	1	1	5
hsa-miR-3975	MIMAT0019360	EIF4EBP2	1979	NM_004096	1	1	0	0	0	1	0	0	0	0	1	1	5
hsa-miR-3975	MIMAT0019360	ELN	2006	NM_001278939	1	1	0	0	0	1	0	0	0	0	1	1	5
hsa-miR-3975	MIMAT0019360	EMP2	2013	NM_001424	1	1	0	0	0	1	0	0	0	0	1	1	5
hsa-miR-3975	MIMAT0019360	EN2	2020	NM_001427	1	1	0	0	0	1	0	0	0	0	1	1	5
hsa-miR-3975	MIMAT0019360	ENSA	2029	NM_207043	0	1	1	0	0	1	0	0	0	0	1	1	5
hsa-miR-3975	MIMAT0019360	EPHA8	2046	NM_020526	0	1	1	0	0	1	0	0	0	0	1	1	5
hsa-miR-3975	MIMAT0019360	STX2	2054	NM_194356	1	1	0	0	0	1	0	0	0	0	1	1	5
hsa-miR-3975	MIMAT0019360	ETF1	2107	XM_005271922	0	1	1	0	0	1	0	0	0	0	1	1	5
hsa-miR-3975	MIMAT0019360	F8	2157	NM_000132	1	1	0	0	0	1	0	0	0	0	1	1	5
hsa-miR-3975	MIMAT0019360	FBN1	2200	NM_000138	1	1	0	0	0	1	0	0	0	0	1	1	5
hsa-miR-3975	MIMAT0019360	FLNC	2318	NM_001458	1	1	0	0	0	1	0	0	0	0	1	1	5
hsa-miR-3975	MIMAT0019360	FLOT2	2319	NM_004475	1	1	0	0	0	1	0	0	0	0	1	1	5
hsa-miR-3975	MIMAT0019360	FUT4	2526	NM_002033	1	1	0	0	0	1	0	0	0	0	1	1	5
hsa-miR-3975	MIMAT0019360	KDSR	2531	NM_002035	1	1	0	0	0	1	0	0	0	0	1	1	5
hsa-miR-3975	MIMAT0019360	G6PD	2539	NM_000402	1	1	0	0	0	1	0	0	0	0	1	1	5
hsa-miR-3975	MIMAT0019360	GABBR1	2550	NM_001470	1	1	0	0	0	1	0	0	0	0	1	1	5
hsa-miR-3975	MIMAT0019360	GABRB2	2561	NM_021911	1	1	0	0	0	1	0	0	0	0	1	1	5
hsa-miR-3975	MIMAT0019360	GABRB3	2562	NM_001278631	1	1	0	0	0	1	0	0	0	0	1	1	5
hsa-miR-3975	MIMAT0019360	GABRE	2564	XM_005274661	1	1	0	0	0	1	0	0	0	0	1	1	5
hsa-miR-3975	MIMAT0019360	GABRP	2568	NM_014211	1	1	0	0	0	1	0	0	0	0	1	1	5
hsa-miR-3975	MIMAT0019360	GAS8	2622	XM_005256306	1	1	0	0	0	1	0	0	0	0	1	1	5
hsa-miR-3975	MIMAT0019360	GATA4	2626	XM_005272386	1	1	0	0	0	1	0	0	0	0	1	1	5
hsa-miR-3975	MIMAT0019360	GDNF	2668	NM_001190468	1	1	0	0	0	1	0	0	0	0	1	1	5
hsa-miR-3975	MIMAT0019360	GGCX	2677	NM_000821	1	1	1	0	0	0	0	0	0	0	1	1	5
hsa-miR-3975	MIMAT0019360	B4GALT1	2683	NM_001497	1	1	0	0	0	1	0	0	0	0	1	1	5
hsa-miR-3975	MIMAT0019360	GGT7	2686	NM_178026	1	1	0	0	0	1	0	0	0	0	1	1	5
hsa-miR-3975	MIMAT0019360	GJA5	2702	XM_005277385	1	1	0	0	0	1	0	0	0	0	1	1	5
hsa-miR-3975	MIMAT0019360	GLI2	2736	XM_005263640	1	1	0	0	0	1	0	0	0	0	1	1	5
hsa-miR-3975	MIMAT0019360	GM2A	2760	NM_000405	1	1	0	0	0	1	0	0	0	0	1	1	5
hsa-miR-3975	MIMAT0019360	GNAL	2774	NM_182978	1	1	0	0	0	1	0	0	0	0	1	1	5
hsa-miR-3975	MIMAT0019360	GNG7	2788	NM_052847	1	1	0	0	0	1	0	0	0	0	1	1	5
hsa-miR-3975	MIMAT0019360	GPI	2821	NM_001184722	1	1	0	0	0	1	0	0	0	0	1	1	5
hsa-miR-3975	MIMAT0019360	RAPGEF1	2889	XM_005272185	1	1	0	0	0	1	0	0	0	0	1	1	5
hsa-miR-3975	MIMAT0019360	GRIA1	2890	NM_001258020	1	1	0	0	0	1	0	0	0	0	1	1	5
hsa-miR-3975	MIMAT0019360	GRIA3	2892	NM_000828	1	1	0	0	0	1	0	0	0	0	1	1	5
hsa-miR-3975	MIMAT0019360	GRIA3	2892	NM_007325	1	1	0	0	0	1	0	0	0	0	1	1	5
hsa-miR-3975	MIMAT0019360	GSK3A	2931	NM_019884	1	1	0	0	0	1	0	0	0	0	1	1	5
hsa-miR-3975	MIMAT0019360	GSTM4	2948	NM_000850	1	1	0	0	0	1	0	0	0	0	1	1	5
hsa-miR-3975	MIMAT0019360	GTF2A2	2958	NM_004492	0	1	1	0	0	1	0	0	0	0	1	1	5
hsa-miR-3975	MIMAT0019360	MR1	3140	NM_001531	1	1	0	0	0	1	0	0	0	0	1	1	5
hsa-miR-3975	MIMAT0019360	HMGN1	3150	XM_005260957	0	1	1	0	0	1	0	0	0	0	1	1	5
hsa-miR-3975	MIMAT0019360	HMOX2	3163	NM_001127204	1	1	0	0	0	1	0	0	0	0	1	1	5
hsa-miR-3975	MIMAT0019360	HNF4A	3172	NM_001258355	1	1	0	0	0	1	0	0	0	0	1	1	5
hsa-miR-3975	MIMAT0019360	TLX1	3195	NM_001195517	1	1	0	0	0	1	0	0	0	0	1	1	5
hsa-miR-3975	MIMAT0019360	HOXB6	3216	XM_005257284	1	1	0	0	0	1	0	0	0	0	1	1	5
hsa-miR-3975	MIMAT0019360	HRH1	3269	NM_001098213	1	1	0	0	0	1	0	0	0	0	1	1	5
hsa-miR-3975	MIMAT0019360	NDST1	3340	XM_005268435	1	1	0	0	0	1	0	0	0	0	1	1	5
hsa-miR-3975	MIMAT0019360	FOXN2	3344	XM_005264283	0	1	1	0	0	1	0	0	0	0	1	1	5
hsa-miR-3975	MIMAT0019360	ICA1	3382	XM_005249734	1	1	0	0	0	1	0	0	0	0	1	1	5
hsa-miR-3975	MIMAT0019360	IFNAR1	3454	NM_000629	1	1	0	0	0	1	0	0	0	0	1	1	5
hsa-miR-3975	MIMAT0019360	IGF1R	3480	NM_000875	1	1	0	0	0	1	0	0	0	0	1	1	5
hsa-miR-3975	MIMAT0019360	IGHMBP2	3508	NM_002180	1	1	0	0	0	1	0	0	0	0	1	1	5
hsa-miR-3975	MIMAT0019360	CXCR2	3579	NM_001557	1	1	0	0	0	1	0	0	0	0	1	1	5
hsa-miR-3975	MIMAT0019360	IL10RA	3587	NM_001558	1	1	0	0	0	1	0	0	0	0	1	1	5
hsa-miR-3975	MIMAT0019360	INPP5A	3632	XM_005252681	1	1	0	0	0	1	0	0	0	0	1	1	5
hsa-miR-3975	MIMAT0019360	IRF1	3659	NM_002198	1	1	0	0	0	1	0	0	0	0	1	1	5
hsa-miR-3975	MIMAT0019360	ISLR	3671	NM_005545	1	1	0	0	0	1	0	0	0	0	1	1	5
hsa-miR-3975	MIMAT0019360	ITGA3	3675	NM_002204	1	1	0	0	0	1	0	0	0	0	1	1	5
hsa-miR-3975	MIMAT0019360	ITPR3	3710	XM_005249086	1	1	0	0	0	1	0	0	0	0	1	1	5
hsa-miR-3975	MIMAT0019360	KCNA1	3736	NM_000217	0	1	1	0	0	1	0	0	0	0	1	1	5
hsa-miR-3975	MIMAT0019360	KCNC1	3746	NM_004976	1	1	0	0	0	1	0	0	0	0	1	1	5
hsa-miR-3975	MIMAT0019360	KCNJ2	3759	XM_005257332	0	1	1	0	0	1	0	0	0	0	1	1	5
hsa-miR-3975	MIMAT0019360	KCNK3	3777	NM_002246	1	1	1	0	0	0	0	0	0	0	1	1	5
hsa-miR-3975	MIMAT0019360	KCNS1	3787	NM_002251	1	1	0	0	0	1	0	0	0	0	1	1	5
hsa-miR-3975	MIMAT0019360	STMN1	3925	NM_001145454	1	1	0	0	0	1	0	0	0	0	1	1	5
hsa-miR-3975	MIMAT0019360	LMX1B	4010	NM_001174146	1	1	0	0	0	1	0	0	0	0	1	1	5
hsa-miR-3975	MIMAT0019360	LOR	4014	NM_000427	0	1	1	0	0	1	0	0	0	0	1	1	5
hsa-miR-3975	MIMAT0019360	LRP2	4036	NM_004525	1	1	0	0	0	1	0	0	0	0	1	1	5
hsa-miR-3975	MIMAT0019360	LTBP2	4053	NM_000428	0	1	1	0	0	1	0	0	0	0	1	1	5
hsa-miR-3975	MIMAT0019360	LTBR	4055	NM_002342	1	1	0	0	0	1	0	0	0	0	1	1	5
hsa-miR-3975	MIMAT0019360	LTF	4057	NM_002343	1	1	0	0	0	1	0	0	0	0	1	1	5
hsa-miR-3975	MIMAT0019360	LY6E	4061	XM_005250918	1	1	0	0	0	1	0	0	0	0	1	1	5
hsa-miR-3975	MIMAT0019360	LYN	4067	NM_002350	1	1	0	0	0	0	0	1	0	0	1	1	5
hsa-miR-3975	MIMAT0019360	MAPT	4137	NM_001123066	1	1	0	0	0	1	0	0	0	0	1	1	5
hsa-miR-3975	MIMAT0019360	MAX	4149	NM_145113	1	1	0	0	0	1	0	0	0	0	1	1	5
hsa-miR-3975	MIMAT0019360	MCL1	4170	NM_021960	1	1	0	0	0	1	0	0	0	0	1	1	5
hsa-miR-3975	MIMAT0019360	MAP3K3	4215	XM_005257376	1	1	0	0	0	1	0	0	0	0	1	1	5
hsa-miR-3975	MIMAT0019360	MFAP3	4238	NM_001242336	1	1	0	0	0	1	0	0	0	0	1	1	5
hsa-miR-3975	MIMAT0019360	AFF1	4299	XM_005263009	1	1	0	0	0	1	0	0	0	0	1	1	5
hsa-miR-3975	MIMAT0019360	AFF1	4299	XM_005263010	1	1	0	0	0	1	0	0	0	0	1	1	5
hsa-miR-3975	MIMAT0019360	MNAT1	4331	NM_002431	1	1	0	0	0	1	0	0	0	0	1	1	5
hsa-miR-3975	MIMAT0019360	MNT	4335	NM_020310	1	1	0	0	0	1	0	0	0	0	1	1	5
hsa-miR-3975	MIMAT0019360	ABCC1	4363	NM_004996	1	1	0	0	0	1	0	0	0	0	1	1	5
hsa-miR-3975	MIMAT0019360	MSN	4478	XM_005262269	1	1	0	0	0	1	0	0	0	0	1	1	5
hsa-miR-3975	MIMAT0019360	MYO6	4646	NM_004999	1	1	0	0	0	1	0	0	0	0	1	1	5
hsa-miR-3975	MIMAT0019360	NDUFB2	4708	XM_005250001	1	1	0	0	0	1	0	0	0	0	1	1	5
hsa-miR-3975	MIMAT0019360	NFKBIL1	4795	NM_005007	1	1	0	0	0	1	0	0	0	0	1	1	5
hsa-miR-3975	MIMAT0019360	NFYA	4800	NM_002505	1	1	1	0	0	0	0	0	0	0	1	1	5
hsa-miR-3975	MIMAT0019360	NOS2	4843	NM_000625	1	1	0	0	0	1	0	0	0	0	1	1	5
hsa-miR-3975	MIMAT0019360	NOTCH3	4854	NM_000435	1	1	0	0	0	1	0	0	0	0	1	1	5
hsa-miR-3975	MIMAT0019360	NPR1	4881	NM_000906	1	1	0	0	0	1	0	0	0	0	1	1	5
hsa-miR-3975	MIMAT0019360	NPY1R	4886	XM_005263031	1	1	0	0	0	1	0	0	0	0	1	1	5
hsa-miR-3975	MIMAT0019360	NRGN	4900	NM_001126181	1	1	0	0	0	1	0	0	0	0	1	1	5
hsa-miR-3975	MIMAT0019360	NTRK3	4916	NM_001007156	1	1	0	0	0	1	0	0	0	0	1	1	5
hsa-miR-3975	MIMAT0019360	NUCB1	4924	NM_006184	1	1	0	0	0	1	0	0	0	0	1	1	5
hsa-miR-3975	MIMAT0019360	OPA1	4976	NM_130837	1	1	0	0	0	1	0	0	0	0	1	1	5
hsa-miR-3975	MIMAT0019360	OPCML	4978	XM_005271572	1	1	0	0	0	1	0	0	0	0	1	1	5
hsa-miR-3975	MIMAT0019360	OSBP	5007	NM_002556	0	1	0	0	0	1	0	1	0	0	1	1	5
hsa-miR-3975	MIMAT0019360	CLDN11	5010	NM_005602	1	1	1	0	0	0	0	0	0	0	1	1	5
hsa-miR-3975	MIMAT0019360	PAX5	5079	NM_016734	1	1	0	0	0	1	0	0	0	0	1	1	5
hsa-miR-3975	MIMAT0019360	PDE3A	5139	XM_005253389	1	1	0	0	0	1	0	0	0	0	1	1	5
hsa-miR-3975	MIMAT0019360	PDE4A	5141	NM_001111307	1	1	1	0	0	0	0	0	0	0	1	1	5
hsa-miR-3975	MIMAT0019360	PDK4	5166	NM_002612	1	1	0	0	0	1	0	0	0	0	1	1	5
hsa-miR-3975	MIMAT0019360	PEX12	5193	NM_000286	1	1	0	0	0	1	0	0	0	0	1	1	5
hsa-miR-3975	MIMAT0019360	PLCB3	5331	NM_000932	1	1	0	0	0	1	0	0	0	0	1	1	5
hsa-miR-3975	MIMAT0019360	FXYD3	5349	XM_005258993	1	1	0	0	0	1	0	0	0	0	1	1	5
hsa-miR-3975	MIMAT0019360	POLE	5426	NM_006231	1	1	0	0	0	1	0	0	0	0	1	1	5
hsa-miR-3975	MIMAT0019360	POU2AF1	5450	XM_005271594	1	1	0	0	0	1	0	0	0	0	1	1	5
hsa-miR-3975	MIMAT0019360	POU6F1	5463	NM_002702	1	1	0	0	0	0	0	1	0	0	1	1	5
hsa-miR-3975	MIMAT0019360	PPP2R2C	5522	XM_005247976	1	1	0	0	0	1	0	0	0	0	1	1	5
hsa-miR-3975	MIMAT0019360	PPP2R4	5524	NM_178001	1	1	0	0	0	1	0	0	0	0	1	1	5
hsa-miR-3975	MIMAT0019360	PPP2R5E	5529	XM_005267832	1	1	1	0	0	0	0	0	0	0	1	1	5
hsa-miR-3975	MIMAT0019360	PRKACB	5567	XM_005271016	1	1	0	0	0	1	0	0	0	0	1	1	5
hsa-miR-3975	MIMAT0019360	PRKAR2A	5576	XM_005265314	1	1	0	0	0	1	0	0	0	0	1	1	5
hsa-miR-3975	MIMAT0019360	PSMA5	5686	NM_002790	1	1	0	0	0	1	0	0	0	0	1	1	5
hsa-miR-3975	MIMAT0019360	PTAFR	5724	NM_001164723	1	1	0	0	0	1	0	0	0	0	1	1	5
hsa-miR-3975	MIMAT0019360	TWF1	5756	NM_001242397	1	1	0	0	0	1	0	0	0	0	1	1	5
hsa-miR-3975	MIMAT0019360	QSOX1	5768	XM_005245375	1	1	0	0	0	1	0	0	0	0	1	1	5
hsa-miR-3975	MIMAT0019360	PVRL2	5819	NM_001042724	1	1	0	0	0	1	0	0	0	0	1	1	5
hsa-miR-3975	MIMAT0019360	RAB3B	5865	NM_002867	1	1	0	0	0	1	0	0	0	0	1	1	5
hsa-miR-3975	MIMAT0019360	RASGRF2	5924	NM_006909	1	1	0	0	0	1	0	0	0	0	1	1	5
hsa-miR-3975	MIMAT0019360	RNF4	6047	NM_001185009	1	1	0	0	0	1	0	0	0	0	1	1	5
hsa-miR-3975	MIMAT0019360	RORC	6097	XM_005245423	1	1	0	0	0	1	0	0	0	0	1	1	5
hsa-miR-3975	MIMAT0019360	RPS6KA3	6197	XM_005274574	1	1	0	0	0	1	0	0	0	0	1	1	5
hsa-miR-3975	MIMAT0019360	RRAS	6237	NM_006270	1	1	0	0	0	1	0	0	0	0	1	1	5
hsa-miR-3975	MIMAT0019360	RRM2	6241	NM_001165931	1	1	0	0	0	1	0	0	0	0	1	1	5
hsa-miR-3975	MIMAT0019360	SAA2	6289	NM_001127380	1	1	0	0	0	1	0	0	0	0	1	1	5
hsa-miR-3975	MIMAT0019360	SCN4A	6329	XM_005257566	1	1	0	0	0	1	0	0	0	0	1	1	5
hsa-miR-3975	MIMAT0019360	SCN8A	6334	NM_014191	1	1	0	0	0	1	0	0	0	0	1	1	5
hsa-miR-3975	MIMAT0019360	CCL21	6366	NM_002989	1	1	0	0	0	1	0	0	0	0	1	1	5
hsa-miR-3975	MIMAT0019360	SH3BP2	6452	NM_001145855	1	1	0	0	0	1	0	0	0	0	1	1	5
hsa-miR-3975	MIMAT0019360	ST6GAL1	6480	XM_005247718	1	1	0	0	0	1	0	0	0	0	1	1	5
hsa-miR-3975	MIMAT0019360	ST3GAL1	6482	XM_005251023	1	1	0	0	0	1	0	0	0	0	1	1	5
hsa-miR-3975	MIMAT0019360	SIM1	6492	XM_005267100	1	1	0	0	0	1	0	0	0	0	1	1	5
hsa-miR-3975	MIMAT0019360	SLC1A2	6506	NM_004171	1	1	0	0	0	1	0	0	0	0	1	1	5
hsa-miR-3975	MIMAT0019360	SLC5A1	6523	NM_000343	1	1	0	0	0	1	0	0	0	0	1	1	5
hsa-miR-3975	MIMAT0019360	SLC7A1	6541	NM_003045	1	1	0	0	0	1	0	0	0	0	1	1	5
hsa-miR-3975	MIMAT0019360	SLC8A2	6543	NM_015063	1	1	0	0	0	1	0	0	0	0	1	1	5
hsa-miR-3975	MIMAT0019360	SLC12A3	6559	NM_000339	1	1	0	0	0	1	0	0	0	0	1	1	5
hsa-miR-3975	MIMAT0019360	SLC16A2	6567	NM_006517	1	1	0	0	0	1	0	0	0	0	1	1	5
hsa-miR-3975	MIMAT0019360	SLCO2A1	6578	NM_005630	1	1	0	0	0	1	0	0	0	0	1	1	5
hsa-miR-3975	MIMAT0019360	SMARCD1	6602	XM_005269107	1	1	0	0	0	1	0	0	0	0	1	1	5
hsa-miR-3975	MIMAT0019360	SNCA	6622	NM_000345	1	1	0	0	0	1	0	0	0	0	1	1	5
hsa-miR-3975	MIMAT0019360	SNTB1	6641	XM_005251031	1	1	0	0	0	1	0	0	0	0	1	1	5
hsa-miR-3975	MIMAT0019360	SOS1	6654	XM_005264515	1	1	0	0	0	1	0	0	0	0	1	1	5
hsa-miR-3975	MIMAT0019360	SOX10	6663	NM_006941	1	1	0	0	0	1	0	0	0	0	1	1	5
hsa-miR-3975	MIMAT0019360	SPTB	6710	XM_005268022	1	1	0	0	0	1	0	0	0	0	1	1	5
hsa-miR-3975	MIMAT0019360	SSR1	6745	NM_003144	1	1	0	0	0	1	0	0	0	0	1	1	5
hsa-miR-3975	MIMAT0019360	STIM1	6786	NM_001277961	1	1	0	0	0	1	0	0	0	0	1	1	5
hsa-miR-3975	MIMAT0019360	STX5	6811	NM_001244666	0	1	0	0	0	1	0	1	0	0	1	1	5
hsa-miR-3975	MIMAT0019360	SYT4	6860	NM_020783	1	1	0	0	0	1	0	0	0	0	1	1	5
hsa-miR-3975	MIMAT0019360	TACC1	6867	XM_005273622	1	1	0	0	0	1	0	0	0	0	1	1	5
hsa-miR-3975	MIMAT0019360	TACC1	6867	XM_005273623	1	1	0	0	0	1	0	0	0	0	1	1	5
hsa-miR-3975	MIMAT0019360	TAL1	6886	NM_003189	1	1	0	0	0	1	0	0	0	0	1	1	5
hsa-miR-3975	MIMAT0019360	CNTN2	6900	NM_005076	1	1	0	0	0	1	0	0	0	0	1	1	5
hsa-miR-3975	MIMAT0019360	TCEB3	6924	NM_003198	1	1	0	0	0	1	0	0	0	0	1	1	5
hsa-miR-3975	MIMAT0019360	MLX	6945	NM_170607	1	1	0	0	0	1	0	0	0	0	1	1	5
hsa-miR-3975	MIMAT0019360	TEAD3	7005	XM_005249342	1	1	0	0	0	1	0	0	0	0	1	1	5
hsa-miR-3975	MIMAT0019360	TFRC	7037	NM_003234	1	1	0	0	0	1	0	0	0	0	1	1	5
hsa-miR-3975	MIMAT0019360	TIMP2	7077	NM_003255	1	1	0	0	0	1	0	0	0	0	1	1	5
hsa-miR-3975	MIMAT0019360	TK2	7084	NM_001271934	1	1	0	0	0	1	0	0	0	0	1	1	5
hsa-miR-3975	MIMAT0019360	TLN1	7094	NM_006289	1	1	0	0	0	1	0	0	0	0	1	1	5
hsa-miR-3975	MIMAT0019360	TNS1	7145	XM_005246822	1	1	0	0	0	1	0	0	0	0	1	1	5
hsa-miR-3975	MIMAT0019360	TOP1	7150	XM_005260541	1	1	0	0	0	1	0	0	0	0	1	1	5
hsa-miR-3975	MIMAT0019360	TSHR	7253	XM_005268038	1	1	0	0	0	1	0	0	0	0	1	1	5
hsa-miR-3975	MIMAT0019360	TNFSF4	7292	NM_003326	1	1	0	0	0	1	0	0	0	0	1	1	5
hsa-miR-3975	MIMAT0019360	SUMO1	7341	NM_003352	1	1	0	0	0	1	0	0	0	0	1	1	5
hsa-miR-3975	MIMAT0019360	UBTF	7343	NM_014233	1	1	0	0	0	1	0	0	0	0	1	1	5
hsa-miR-3975	MIMAT0019360	VDR	7421	NM_001017536	1	1	0	0	0	1	0	0	0	0	1	1	5
hsa-miR-3975	MIMAT0019360	WNT2	7472	NM_003391	1	1	0	0	0	1	0	0	0	0	1	1	5
hsa-miR-3975	MIMAT0019360	WNT9B	7484	XM_005257637	1	1	0	0	0	1	0	0	0	0	1	1	5
hsa-miR-3975	MIMAT0019360	YWHAB	7529	NM_003404	1	1	0	0	0	1	0	0	0	0	1	1	5
hsa-miR-3975	MIMAT0019360	SF1	7536	XM_005274236	1	1	0	0	0	1	0	0	0	0	1	1	5
hsa-miR-3975	MIMAT0019360	ZNF45	7596	NM_003425	1	1	0	0	0	1	0	0	0	0	1	1	5
hsa-miR-3975	MIMAT0019360	ZFAND5	7763	NM_001102420	1	1	0	0	0	1	0	0	0	0	1	1	5
hsa-miR-3975	MIMAT0019360	SLC30A3	7781	XM_005264551	1	1	0	0	0	1	0	0	0	0	1	1	5
hsa-miR-3975	MIMAT0019360	BTG2	7832	NM_006763	1	1	0	0	0	1	0	0	0	0	1	1	5
hsa-miR-3975	MIMAT0019360	FGF23	8074	NM_020638	1	1	0	0	0	1	0	0	0	0	1	1	5
hsa-miR-3975	MIMAT0019360	HMGA2	8091	NM_003483	1	1	0	0	0	1	0	0	0	0	1	1	5
hsa-miR-3975	MIMAT0019360	RND2	8153	NM_005440	0	1	1	0	0	1	0	0	0	0	1	1	5
hsa-miR-3975	MIMAT0019360	EPX	8288	NM_000502	0	1	1	0	0	1	0	0	0	0	1	1	5
hsa-miR-3975	MIMAT0019360	FZD7	8324	NM_003507	1	1	0	0	0	1	0	0	0	0	1	1	5
hsa-miR-3975	MIMAT0019360	ZNF282	8427	NM_003575	1	1	0	0	0	1	0	0	0	0	1	1	5
hsa-miR-3975	MIMAT0019360	STK24	8428	NM_001032296	0	1	1	0	0	1	0	0	0	0	1	1	5
hsa-miR-3975	MIMAT0019360	CUL3	8452	NM_003590	1	1	0	0	0	1	0	0	0	0	1	1	5
hsa-miR-3975	MIMAT0019360	OGT	8473	XM_005262308	1	1	0	0	0	1	0	0	0	0	1	1	5
hsa-miR-3975	MIMAT0019360	SEMA7A	8482	NM_003612	0	1	1	0	0	1	0	0	0	0	1	1	5
hsa-miR-3975	MIMAT0019360	CNTNAP1	8506	XM_005257748	1	1	0	0	0	1	0	0	0	0	1	1	5
hsa-miR-3975	MIMAT0019360	DGKD	8527	NM_152879	0	1	1	0	0	1	0	0	0	0	1	1	5
hsa-miR-3975	MIMAT0019360	RAB11A	8766	NM_004663	1	1	0	0	0	1	0	0	0	0	1	1	5
hsa-miR-3975	MIMAT0019360	TNFRSF10B	8795	NM_003842	1	1	0	0	0	1	0	0	0	0	1	1	5
hsa-miR-3975	MIMAT0019360	PEX11A	8800	NM_003847	1	1	0	0	0	1	0	0	0	0	1	1	5
hsa-miR-3975	MIMAT0019360	IL18R1	8809	NM_003855	1	1	0	0	0	1	0	0	0	0	1	1	5
hsa-miR-3975	MIMAT0019360	CD84	8832	NM_001184879	1	1	0	0	0	1	0	0	0	0	1	1	5
hsa-miR-3975	MIMAT0019360	SGPL1	8879	NM_003901	1	1	0	0	0	1	0	0	0	0	1	1	5
hsa-miR-3975	MIMAT0019360	DDX18	8886	NM_006773	1	1	0	0	0	1	0	0	0	0	1	1	5
hsa-miR-3975	MIMAT0019360	MGAM	8972	XM_005250069	1	1	0	0	0	1	0	0	0	0	1	1	5
hsa-miR-3975	MIMAT0019360	MGAM	8972	XM_005276999	1	1	0	0	0	1	0	0	0	0	1	1	5
hsa-miR-3975	MIMAT0019360	USP13	8975	NM_003940	1	1	0	0	0	1	0	0	0	0	1	1	5
hsa-miR-3975	MIMAT0019360	SEMA5A	9037	NM_003966	1	1	0	0	0	1	0	0	0	0	1	1	5
hsa-miR-3975	MIMAT0019360	SYT7	9066	XM_005274384	1	1	1	0	0	0	0	0	0	0	1	1	5
hsa-miR-3975	MIMAT0019360	TBX19	9095	NM_005149	1	1	0	0	0	1	0	0	0	0	1	1	5
hsa-miR-3975	MIMAT0019360	NEURL	9148	NM_004210	1	1	0	0	0	1	0	0	0	0	1	1	5
hsa-miR-3975	MIMAT0019360	MAP3K13	9175	NM_004721	1	1	0	0	0	1	0	0	0	0	1	1	5
hsa-miR-3975	MIMAT0019360	DLGAP2	9228	XM_005266038	1	1	0	0	0	1	0	0	0	0	1	1	5
hsa-miR-3975	MIMAT0019360	DHRS3	9249	NM_004753	1	1	0	0	0	1	0	0	0	0	1	1	5
hsa-miR-3975	MIMAT0019360	MFHAS1	9258	NM_004225	1	1	0	0	0	1	0	0	0	0	1	1	5
hsa-miR-3975	MIMAT0019360	CYTH3	9265	NM_004227	1	1	0	0	0	1	0	0	0	0	1	1	5
hsa-miR-3975	MIMAT0019360	CYTH1	9267	NM_004762	1	1	0	0	0	1	0	0	0	0	1	1	5
hsa-miR-3975	MIMAT0019360	ZNHIT3	9326	NM_001281432	1	1	0	0	0	1	0	0	0	0	1	1	5
hsa-miR-3975	MIMAT0019360	SLC9A3R2	9351	NM_001130012	1	1	0	0	0	1	0	0	0	0	1	1	5
hsa-miR-3975	MIMAT0019360	2019-09-15	9403	NM_004261	1	1	0	0	0	1	0	0	0	0	1	1	5
hsa-miR-3975	MIMAT0019360	ITM2B	9445	NM_021999	1	1	0	0	0	1	0	0	0	0	1	1	5
hsa-miR-3975	MIMAT0019360	PGS1	9489	XM_005257833	1	1	0	0	0	1	0	0	0	0	1	1	5
hsa-miR-3975	MIMAT0019360	NPEPPS	9520	NM_006310	1	1	0	0	0	1	0	0	0	0	1	1	5
hsa-miR-3975	MIMAT0019360	IGDCC3	9543	NM_004884	1	1	0	0	0	1	0	0	0	0	1	1	5
hsa-miR-3975	MIMAT0019360	RAB3D	9545	NM_004283	1	1	0	0	0	1	0	0	0	0	1	1	5
hsa-miR-3975	MIMAT0019360	CXCL14	9547	NM_004887	1	1	0	0	0	1	0	0	0	0	1	1	5
hsa-miR-3975	MIMAT0019360	H2AFY	9555	XM_005272134	1	1	0	0	0	1	0	0	0	0	1	1	5
hsa-miR-3975	MIMAT0019360	VPS26A	9559	XM_005270288	1	1	0	0	0	1	0	0	0	0	1	1	5
hsa-miR-3975	MIMAT0019360	GABBR2	9568	NM_005458	1	1	0	0	0	1	0	0	0	0	1	1	5
hsa-miR-3975	MIMAT0019360	CDC42BPB	9578	NM_006035	1	1	0	0	0	1	0	0	0	0	1	1	5
hsa-miR-3975	MIMAT0019360	PREPL	9581	NM_006036	0	1	1	0	0	1	0	0	0	0	1	1	5
hsa-miR-3975	MIMAT0019360	AKAP12	9590	XM_005267234	1	1	0	0	0	1	0	0	0	0	1	1	5
hsa-miR-3975	MIMAT0019360	AATK	9625	XM_005257849	1	1	0	0	0	1	0	0	0	0	1	1	5
hsa-miR-3975	MIMAT0019360	IKBKE	9641	NM_014002	1	1	0	0	0	1	0	0	0	0	1	1	5
hsa-miR-3975	MIMAT0019360	RALGPS1	9649	XM_005252318	1	1	0	0	0	1	0	0	0	0	1	1	5
hsa-miR-3975	MIMAT0019360	WSCD2	9671	XM_005269240	0	1	1	0	0	1	0	0	0	0	1	1	5
hsa-miR-3975	MIMAT0019360	UBE3C	9690	NM_014671	1	1	0	0	0	1	0	0	0	0	1	1	5
hsa-miR-3975	MIMAT0019360	ESPL1	9700	NM_012291	1	1	0	0	0	1	0	0	0	0	1	1	5
hsa-miR-3975	MIMAT0019360	DHX34	9704	XM_005259443	1	1	0	0	0	1	0	0	0	0	1	1	5
hsa-miR-3975	MIMAT0019360	FAM131B	9715	XM_005250073	1	1	0	0	0	1	0	0	0	0	1	1	5
hsa-miR-3975	MIMAT0019360	SEC14L5	9717	NM_014692	1	1	0	0	0	1	0	0	0	0	1	1	5
hsa-miR-3975	MIMAT0019360	GPRIN2	9721	XM_005270329	1	1	1	0	0	0	0	0	0	0	1	1	5
hsa-miR-3975	MIMAT0019360	FRMPD4	9758	NM_014728	1	1	0	0	0	1	0	0	0	0	1	1	5
hsa-miR-3975	MIMAT0019360	HDAC4	9759	NM_006037	1	1	0	0	0	1	0	0	0	0	1	1	5
hsa-miR-3975	MIMAT0019360	MLEC	9761	NM_014730	0	1	1	0	0	1	0	0	0	0	1	1	5
hsa-miR-3975	MIMAT0019360	TM9SF4	9777	XM_005260622	1	1	0	0	0	1	0	0	0	0	1	1	5
hsa-miR-3975	MIMAT0019360	RNF144A	9781	NM_014746	1	1	0	0	0	1	0	0	0	0	1	1	5
hsa-miR-3975	MIMAT0019360	MTSS1	9788	XM_005251111	0	1	1	0	0	1	0	0	0	0	1	1	5
hsa-miR-3975	MIMAT0019360	PHYHIP	9796	NM_001099335	1	1	0	0	0	1	0	0	0	0	1	1	5
hsa-miR-3975	MIMAT0019360	CTIF	9811	NM_001142397	1	1	0	0	0	1	0	0	0	0	1	1	5
hsa-miR-3975	MIMAT0019360	EFCAB14	9813	NM_014774	1	1	0	0	0	1	0	0	0	0	1	1	5
hsa-miR-3975	MIMAT0019360	TRIM66	9866	XM_005253270	1	1	0	0	0	1	0	0	0	0	1	1	5
hsa-miR-3975	MIMAT0019360	AREL1	9870	XM_005268243	0	1	1	0	0	1	0	0	0	0	1	1	5
hsa-miR-3975	MIMAT0019360	ZBTB39	9880	NM_014830	1	1	0	0	0	1	0	0	0	0	1	1	5
hsa-miR-3975	MIMAT0019360	SRGAP3	9901	NM_014850	0	1	1	0	0	1	0	0	0	0	1	1	5
hsa-miR-3975	MIMAT0019360	MRC2	9902	NM_006039	1	1	0	0	0	1	0	0	0	0	1	1	5
hsa-miR-3975	MIMAT0019360	SGSM2	9905	NM_014853	1	1	0	0	0	1	0	0	0	0	1	1	5
hsa-miR-3975	MIMAT0019360	ARHGAP25	9938	NM_001007231	1	1	0	0	0	1	0	0	0	0	1	1	5
hsa-miR-3975	MIMAT0019360	OXSR1	9943	XM_005265638	1	1	0	0	0	1	0	0	0	0	1	1	5
hsa-miR-3975	MIMAT0019360	SLC23A2	9962	NM_203327	1	1	0	0	0	1	0	0	0	0	1	1	5
hsa-miR-3975	MIMAT0019360	AKT3	10000	XM_005272995	0	1	1	0	0	1	0	0	0	0	1	1	5
hsa-miR-3975	MIMAT0019360	GNPDA1	10007	XM_005268350	1	1	0	0	0	1	0	0	0	0	1	1	5
hsa-miR-3975	MIMAT0019360	HDAC6	10013	XM_005272564	0	1	1	0	0	1	0	0	0	0	1	1	5
hsa-miR-3975	MIMAT0019360	HDAC6	10013	XM_005278010	0	1	1	0	0	1	0	0	0	0	1	1	5
hsa-miR-3975	MIMAT0019360	HDAC5	10014	XM_005256904	1	1	0	0	0	1	0	0	0	0	1	1	5
hsa-miR-3975	MIMAT0019360	FRAT1	10023	NM_005479	1	1	0	0	0	1	0	0	0	0	1	1	5
hsa-miR-3975	MIMAT0019360	MAMLD1	10046	XM_005274635	1	1	0	0	0	1	0	0	0	0	1	1	5
hsa-miR-3975	MIMAT0019360	CTDSP2	10106	NM_005730	1	1	0	0	0	1	0	0	0	0	1	1	5
hsa-miR-3975	MIMAT0019360	ACTR1A	10121	NM_005736	0	1	1	0	0	1	0	0	0	0	1	1	5
hsa-miR-3975	MIMAT0019360	LRPPRC	10128	NM_133259	1	1	0	0	0	1	0	0	0	0	1	1	5
hsa-miR-3975	MIMAT0019360	EBI3	10148	NM_005755	1	1	0	0	0	1	0	0	0	0	1	1	5
hsa-miR-3975	MIMAT0019360	PLXNC1	10154	NM_005761	1	1	0	0	0	1	0	1	0	0	1	0	5
hsa-miR-3975	MIMAT0019360	WASF2	10163	NM_006990	0	1	1	0	0	1	0	0	0	0	1	1	5
hsa-miR-3975	MIMAT0019360	CHST4	10164	NM_001166395	1	1	0	0	0	1	0	0	0	0	1	1	5
hsa-miR-3975	MIMAT0019360	PSME3	10197	NM_001267045	0	1	1	0	0	1	0	0	0	0	1	1	5
hsa-miR-3975	MIMAT0019360	MPZL2	10205	NM_005797	1	1	0	0	0	1	0	0	0	0	1	1	5
hsa-miR-3975	MIMAT0019360	TRIM13	10206	NM_213590	0	1	1	0	0	1	0	0	0	0	1	1	5
hsa-miR-3975	MIMAT0019360	FLOT1	10211	XM_005248781	1	1	0	0	0	1	0	0	0	0	1	1	5
hsa-miR-3975	MIMAT0019360	RCAN2	10231	NM_005822	1	1	0	0	0	1	0	0	0	0	1	1	5
hsa-miR-3975	MIMAT0019360	DCAF7	10238	NM_005828	1	1	0	0	0	1	0	0	0	0	1	1	5
hsa-miR-3975	MIMAT0019360	AP3S2	10239	NM_005829	1	1	0	0	0	1	0	0	0	0	1	1	5
hsa-miR-3975	MIMAT0019360	IRX5	10265	NM_005853	1	1	0	0	0	1	0	0	0	0	1	1	5
hsa-miR-3975	MIMAT0019360	FSTL3	10272	NM_005860	1	1	0	0	0	1	0	0	0	0	1	1	5
hsa-miR-3975	MIMAT0019360	TNIP1	10318	NM_001252385	1	1	0	0	0	1	0	0	0	0	1	1	5
hsa-miR-3975	MIMAT0019360	MRVI1	10335	XM_005252736	1	1	0	0	0	1	0	0	0	0	1	1	5
hsa-miR-3975	MIMAT0019360	MICU1	10367	NM_006077	1	1	0	0	0	1	0	0	0	0	1	1	5
hsa-miR-3975	MIMAT0019360	CORO2B	10391	NM_001190457	1	1	0	0	0	1	0	0	0	0	1	1	5
hsa-miR-3975	MIMAT0019360	NOD1	10392	XM_005249569	1	1	0	0	0	1	0	0	0	0	1	1	5
hsa-miR-3975	MIMAT0019360	YAP1	10413	XM_005271378	1	1	0	0	0	1	0	0	0	0	1	1	5
hsa-miR-3975	MIMAT0019360	CXCL13	10563	NM_006419	1	1	0	0	0	1	0	0	0	0	1	1	5
hsa-miR-3975	MIMAT0019360	SORBS1	10580	XM_005269403	1	1	0	0	0	1	0	0	0	0	1	1	5
hsa-miR-3975	MIMAT0019360	HEXIM1	10614	NM_006460	1	1	0	0	0	1	0	0	0	0	1	1	5
hsa-miR-3975	MIMAT0019360	POSTN	10631	NM_006475	0	1	1	0	0	1	0	0	0	0	1	1	5
hsa-miR-3975	MIMAT0019360	AVIL	10677	XM_005268575	1	1	0	0	0	1	0	0	0	0	1	1	5
hsa-miR-3975	MIMAT0019360	POLD3	10714	NM_006591	1	1	0	0	0	1	0	0	0	0	1	1	5
hsa-miR-3975	MIMAT0019360	MAP3K2	10746	NM_006609	1	1	0	0	0	1	0	0	0	0	1	1	5
hsa-miR-3975	MIMAT0019360	ARPP19	10776	XM_005254132	0	1	1	0	0	1	0	0	0	0	1	1	5
hsa-miR-3975	MIMAT0019360	FTCD	10841	XM_005261089	0	1	1	0	0	1	0	0	0	0	1	1	5
hsa-miR-3975	MIMAT0019360	PDE10A	10846	NM_001130690	1	1	0	0	0	1	0	0	0	0	1	1	5
hsa-miR-3975	MIMAT0019360	TSPAN9	10867	NM_006675	1	1	0	0	0	1	0	0	0	0	1	1	5
hsa-miR-3975	MIMAT0019360	GPR83	10888	NM_016540	1	1	0	0	0	1	0	0	0	0	1	1	5
hsa-miR-3975	MIMAT0019360	PPARGC1A	10891	XM_005248133	1	1	0	0	0	1	0	0	0	0	1	1	5
hsa-miR-3975	MIMAT0019360	BLCAP	10904	NM_001167820	1	1	0	0	0	1	0	0	0	0	1	1	5
hsa-miR-3975	MIMAT0019360	EHD1	10938	NM_006795	1	1	0	0	0	1	0	0	0	0	1	1	5
hsa-miR-3975	MIMAT0019360	UQCR11	10975	NM_006830	1	1	0	0	0	1	0	0	0	0	1	1	5
hsa-miR-3975	MIMAT0019360	ATF7	11016	XM_005268586	1	1	0	0	0	1	0	0	0	0	1	1	5
hsa-miR-3975	MIMAT0019360	TDRKH	11022	NM_001083965	1	1	0	0	0	1	0	0	0	0	1	1	5
hsa-miR-3975	MIMAT0019360	SOX30	11063	NM_178424	1	1	0	0	0	1	0	0	0	0	1	1	5
hsa-miR-3975	MIMAT0019360	BTN3A1	11119	NM_001145009	1	1	0	0	0	1	0	0	0	0	1	1	5
hsa-miR-3975	MIMAT0019360	POLR3A	11128	NM_007055	1	1	0	0	0	1	0	0	0	0	1	1	5
hsa-miR-3975	MIMAT0019360	CDC42EP1	11135	XM_005261318	1	1	0	0	0	1	0	0	0	0	1	1	5
hsa-miR-3975	MIMAT0019360	ERLIN2	11160	XM_005273391	1	1	0	0	0	1	0	0	0	0	1	1	5
hsa-miR-3975	MIMAT0019360	C14orf1	11161	NM_007176	0	1	1	0	1	0	0	0	0	0	1	1	5
hsa-miR-3975	MIMAT0019360	ABCB8	11194	NM_007188	1	1	0	0	0	1	0	0	0	0	1	1	5
hsa-miR-3975	MIMAT0019360	FZD10	11211	NM_007197	0	1	1	0	0	1	0	0	0	0	1	1	5
hsa-miR-3975	MIMAT0019360	GPR176	11245	NM_007223	1	1	0	0	0	1	0	0	0	0	1	1	5
hsa-miR-3975	MIMAT0019360	MAN1B1	11253	NM_016219	1	1	0	0	0	1	0	0	0	0	1	1	5
hsa-miR-3975	MIMAT0019360	CHP1	11261	NM_007236	1	1	0	0	0	1	0	0	0	0	1	1	5
hsa-miR-3975	MIMAT0019360	ITGA11	22801	XM_005254227	0	1	1	0	0	1	0	0	0	0	1	1	5
hsa-miR-3975	MIMAT0019360	IKZF3	22806	NM_012481	1	1	1	0	0	0	0	0	0	0	1	1	5
hsa-miR-3975	MIMAT0019360	FNDC3A	22862	NM_001278438	1	1	0	0	0	1	0	0	0	0	1	1	5
hsa-miR-3975	MIMAT0019360	ZHX2	22882	XM_005250837	1	1	0	0	0	1	0	0	0	0	1	1	5
hsa-miR-3975	MIMAT0019360	CEP164	22897	XM_005271451	1	1	0	0	0	1	0	0	0	0	1	1	5
hsa-miR-3975	MIMAT0019360	ARHGEF15	22899	NM_173728	1	1	0	0	0	1	0	0	0	0	1	1	5
hsa-miR-3975	MIMAT0019360	EPN2	22905	XM_005256538	0	1	1	0	0	1	0	0	0	0	1	1	5
hsa-miR-3975	MIMAT0019360	TTC39A	22996	XM_005270646	1	1	0	0	0	1	0	0	0	0	1	1	5
hsa-miR-3975	MIMAT0019360	KLHDC10	23008	NM_014997	0	1	1	0	0	1	0	0	0	0	1	1	5
hsa-miR-3975	MIMAT0019360	WDTC1	23038	NM_001276252	1	1	0	0	0	1	0	0	0	0	1	1	5
hsa-miR-3975	MIMAT0019360	MON2	23041	NM_001278472	1	1	0	0	0	1	0	0	0	0	1	1	5
hsa-miR-3975	MIMAT0019360	KIF21B	23046	NM_001252100	0	1	1	0	0	1	0	0	0	0	1	1	5
hsa-miR-3975	MIMAT0019360	SMG1	23049	XM_005255183	1	1	0	0	0	1	0	0	0	0	1	1	5
hsa-miR-3975	MIMAT0019360	NMNAT2	23057	NM_015039	1	1	0	0	0	1	0	0	0	0	1	1	5
hsa-miR-3975	MIMAT0019360	ZNF609	23060	NM_015042	1	1	0	0	0	1	0	0	0	0	1	1	5
hsa-miR-3975	MIMAT0019360	VWA8	23078	NM_015058	1	1	0	0	0	1	0	0	0	0	1	1	5
hsa-miR-3975	MIMAT0019360	PEG10	23089	NM_001040152	1	1	0	0	0	1	0	0	0	0	1	1	5
hsa-miR-3975	MIMAT0019360	PEG10	23089	NM_001184961	1	1	0	0	0	1	0	0	0	0	1	1	5
hsa-miR-3975	MIMAT0019360	PEG10	23089	NM_001184962	1	1	0	0	0	1	0	0	0	0	1	1	5
hsa-miR-3975	MIMAT0019360	PEG10	23089	NM_015068	1	1	0	0	0	1	0	0	0	0	1	1	5
hsa-miR-3975	MIMAT0019360	SIPA1L3	23094	XM_005258672	0	1	1	0	0	1	0	0	0	0	1	1	5
hsa-miR-3975	MIMAT0019360	FSTL4	23105	NM_015082	1	1	0	0	0	1	0	0	0	0	1	1	5
hsa-miR-3975	MIMAT0019360	MRPS27	23107	NM_015084	1	1	0	0	0	1	0	0	0	0	1	1	5
hsa-miR-3975	MIMAT0019360	DDN	23109	NM_015086	1	1	0	0	0	1	0	0	0	0	1	1	5
hsa-miR-3975	MIMAT0019360	HIC2	23119	XM_005261395	1	1	0	0	0	1	0	0	0	0	1	1	5
hsa-miR-3975	MIMAT0019360	MAPK8IP3	23162	XM_005255191	1	1	0	0	0	1	0	0	0	0	1	1	5
hsa-miR-3975	MIMAT0019360	GPD1L	23171	NM_015141	0	1	1	0	0	1	0	0	0	0	1	1	5
hsa-miR-3975	MIMAT0019360	ZCCHC14	23174	NM_015144	1	1	0	0	0	1	0	0	0	0	1	1	5
hsa-miR-3975	MIMAT0019360	SYT11	23208	NM_152280	1	1	0	0	0	1	0	0	0	0	1	1	5
hsa-miR-3975	MIMAT0019360	NUP210	23225	NM_024923	1	1	0	0	0	1	0	0	0	0	1	1	5
hsa-miR-3975	MIMAT0019360	EXOC6B	23233	XM_005264223	0	1	1	0	0	1	0	0	0	0	1	1	5
hsa-miR-3975	MIMAT0019360	FBXW11	23291	NM_012300	1	1	0	0	0	1	0	0	0	0	1	1	5
hsa-miR-3975	MIMAT0019360	ANKS1A	23294	XM_005248964	0	1	1	0	0	1	0	0	0	0	1	1	5
hsa-miR-3975	MIMAT0019360	SLC9A8	23315	NM_001260491	1	1	0	0	0	1	0	0	0	0	1	1	5
hsa-miR-3975	MIMAT0019360	TBC1D30	23329	NM_015279	0	1	1	0	0	1	0	0	0	0	1	1	5
hsa-miR-3975	MIMAT0019360	SZT2	23334	NM_015284	1	1	0	0	0	1	0	0	0	0	1	1	5
hsa-miR-3975	MIMAT0019360	PPP1R13B	23368	XM_005267487	1	1	0	0	0	1	0	0	0	0	1	1	5
hsa-miR-3975	MIMAT0019360	CRTC1	23373	NM_001098482	1	1	0	0	0	1	0	0	0	0	1	1	5
hsa-miR-3975	MIMAT0019360	SRGAP2	23380	XM_005277510	1	1	1	0	0	0	0	0	0	0	1	1	5
hsa-miR-3975	MIMAT0019360	SLC44A1	23446	XM_005251857	1	1	0	0	0	1	0	0	0	0	1	1	5
hsa-miR-3975	MIMAT0019360	SF3B3	23450	NM_012426	1	1	1	0	0	0	0	0	0	0	1	1	5
hsa-miR-3975	MIMAT0019360	CBX6	23466	XM_005261412	1	1	0	0	0	1	0	0	0	0	1	1	5
hsa-miR-3975	MIMAT0019360	CBX5	23468	NM_001127322	1	1	0	0	0	1	0	0	0	0	1	1	5
hsa-miR-3975	MIMAT0019360	POFUT1	23509	NM_015352	1	1	0	0	0	1	0	0	0	0	1	1	5
hsa-miR-3975	MIMAT0019360	ACAP2	23527	XM_005269314	0	1	1	0	0	1	0	0	0	0	1	1	5
hsa-miR-3975	MIMAT0019360	NNT	23530	NM_012343	1	1	0	0	0	1	0	0	0	0	1	1	5
hsa-miR-3975	MIMAT0019360	PIK3R5	23533	NM_001251851	0	1	1	0	0	1	0	0	0	0	1	1	5
hsa-miR-3975	MIMAT0019360	SEZ6L	23544	NM_021115	1	1	0	0	0	1	0	0	0	0	1	1	5
hsa-miR-3975	MIMAT0019360	RASD2	23551	NM_014310	1	1	0	0	0	1	0	0	0	0	1	1	5
hsa-miR-3975	MIMAT0019360	WBP2	23558	XM_005257180	1	1	0	0	0	1	0	0	0	0	1	1	5
hsa-miR-3975	MIMAT0019360	BACE1	23621	NM_012104	1	1	0	0	0	1	0	0	0	0	1	1	5
hsa-miR-3975	MIMAT0019360	TMEM245	23731	NM_032012	0	1	1	0	0	1	0	0	0	0	1	1	5
hsa-miR-3975	MIMAT0019360	NAT6	24142	XM_005265010	1	1	0	0	0	1	0	0	0	0	1	1	5
hsa-miR-3975	MIMAT0019360	NAT6	24142	XM_005277526	1	1	0	0	0	1	0	0	0	0	1	1	5
hsa-miR-3975	MIMAT0019360	TMEM184B	25829	XM_005261509	1	1	0	0	0	1	0	0	0	0	1	1	5
hsa-miR-3975	MIMAT0019360	ARMC8	25852	NM_015396	1	1	0	0	0	1	0	0	0	0	1	1	5
hsa-miR-3975	MIMAT0019360	SUMF2	25870	NM_015411	1	1	0	0	0	1	0	0	0	0	1	1	5
hsa-miR-3975	MIMAT0019360	METTL21B	25895	NM_206914	1	1	0	0	0	1	0	0	0	0	1	1	5
hsa-miR-3975	MIMAT0019360	TPGS2	25941	NM_015476	1	1	0	0	0	1	0	0	0	0	1	1	5
hsa-miR-3975	MIMAT0019360	C20orf194	25943	XM_005260685	1	1	0	0	0	1	0	0	0	0	1	1	5
hsa-miR-3975	MIMAT0019360	GPR124	25960	NM_032777	1	1	0	0	0	1	0	0	0	0	1	1	5
hsa-miR-3975	MIMAT0019360	TSKU	25987	XM_005273892	1	1	0	0	0	1	0	0	0	0	1	1	5
hsa-miR-3975	MIMAT0019360	TENM4	26011	XM_005273900	1	1	0	0	0	1	0	0	0	0	1	1	5
hsa-miR-3975	MIMAT0019360	OSBPL3	26031	NM_015550	1	1	0	0	0	1	0	0	0	0	1	1	5
hsa-miR-3975	MIMAT0019360	ATRNL1	26033	NM_207303	1	1	0	0	0	1	0	0	0	0	1	1	5
hsa-miR-3975	MIMAT0019360	ZNF451	26036	NM_001257273	1	1	0	0	0	1	0	0	0	0	1	1	5
hsa-miR-3975	MIMAT0019360	SETBP1	26040	XM_005258243	0	1	1	0	0	1	0	0	0	0	1	1	5
hsa-miR-3975	MIMAT0019360	CNTNAP2	26047	NM_014141	0	1	1	0	0	1	0	0	0	0	1	1	5
hsa-miR-3975	MIMAT0019360	RAB11FIP5	26056	XM_005264252	1	1	0	0	0	1	0	0	0	0	1	1	5
hsa-miR-3975	MIMAT0019360	CCDC69	26112	NM_015621	1	1	0	0	0	1	0	0	0	0	1	1	5
hsa-miR-3975	MIMAT0019360	TRPC4AP	26133	NM_015638	1	1	0	0	0	1	0	0	0	0	1	1	5
hsa-miR-3975	MIMAT0019360	LRRC29	26231	NM_012163	0	1	1	0	0	1	0	0	0	0	1	1	5
hsa-miR-3975	MIMAT0019360	GBGT1	26301	XM_005272182	1	1	0	0	0	1	0	0	0	0	1	1	5
hsa-miR-3975	MIMAT0019360	TIMM13	26517	NM_012458	1	1	0	0	0	1	0	0	0	0	1	1	5
hsa-miR-3975	MIMAT0019360	AGO1	26523	XM_005270747	1	1	1	0	0	0	0	0	0	0	1	1	5
hsa-miR-3975	MIMAT0019360	MYEOV	26579	XM_005273905	1	1	0	0	0	1	0	0	0	0	1	1	5
hsa-miR-3975	MIMAT0019360	PDE7B	27115	XM_005266931	1	1	0	0	0	1	0	0	0	0	1	1	5
hsa-miR-3975	MIMAT0019360	AFF4	27125	XM_005271963	0	1	1	0	0	1	0	0	0	0	1	1	5
hsa-miR-3975	MIMAT0019360	DISC1	27185	NM_001164537	1	1	0	0	0	1	0	0	0	0	1	1	5
hsa-miR-3975	MIMAT0019360	IL17C	27189	NM_013278	1	1	0	0	0	1	0	0	0	0	1	1	5
hsa-miR-3975	MIMAT0019360	RND1	27289	NM_014470	1	1	0	0	0	1	0	0	0	0	1	1	5
hsa-miR-3975	MIMAT0019360	RAB30	27314	XM_005273911	1	1	1	0	0	0	0	0	0	0	1	1	5
hsa-miR-3975	MIMAT0019360	TNRC6A	27327	XM_005255253	1	1	0	0	0	1	0	0	0	0	1	1	5
hsa-miR-3975	MIMAT0019360	POLL	27343	NM_001174084	1	1	0	0	0	1	0	0	0	0	1	1	5
hsa-miR-3975	MIMAT0019360	KCNMB4	27345	NM_014505	1	1	0	0	0	1	0	0	0	0	1	1	5
hsa-miR-3975	MIMAT0019360	HIPK2	28996	NM_022740	1	1	0	0	0	1	0	0	0	0	1	1	5
hsa-miR-3975	MIMAT0019360	WDR91	29062	NM_014149	1	1	0	0	0	1	0	0	0	0	1	1	5
hsa-miR-3975	MIMAT0019360	ANKRD11	29123	NM_001256182	1	1	0	0	0	1	0	0	0	0	1	1	5
hsa-miR-3975	MIMAT0019360	CD274	29126	NM_014143	1	1	0	0	0	1	0	0	0	0	1	1	5
hsa-miR-3975	MIMAT0019360	TFCP2L1	29842	NM_014553	1	1	0	0	0	1	0	0	0	0	1	1	5
hsa-miR-3975	MIMAT0019360	SENP1	29843	NM_001267595	1	1	0	0	0	1	0	0	0	0	1	1	5
hsa-miR-3975	MIMAT0019360	EEF2K	29904	NM_013302	1	1	1	0	0	0	0	0	0	0	1	1	5
hsa-miR-3975	MIMAT0019360	PRICKLE4	29964	NM_013397	0	1	1	0	0	1	0	0	0	0	1	1	5
hsa-miR-3975	MIMAT0019360	UBQLN1	29979	NM_013438	1	1	0	0	0	1	0	0	0	0	1	1	5
hsa-miR-3975	MIMAT0019360	PACSIN1	29993	NM_020804	1	1	0	0	0	1	0	0	0	0	1	1	5
hsa-miR-3975	MIMAT0019360	TNPO2	30000	XM_005259880	1	1	0	0	0	1	0	0	0	0	1	1	5
hsa-miR-3975	MIMAT0019360	RAX	30062	NM_013435	1	1	0	0	0	1	0	0	0	0	1	1	5
hsa-miR-3975	MIMAT0019360	EHD3	30845	NM_014600	1	1	1	0	0	0	0	0	0	0	1	1	5
hsa-miR-3975	MIMAT0019360	EHD2	30846	NM_014601	1	1	0	0	0	1	0	0	0	0	1	1	5
hsa-miR-3975	MIMAT0019360	CDR2L	30850	NM_014603	1	1	0	0	0	1	0	0	0	0	1	1	5
hsa-miR-3975	MIMAT0019360	COL5A3	50509	NM_015719	1	1	0	0	0	1	0	0	0	0	1	1	5
hsa-miR-3975	MIMAT0019360	CDON	50937	XM_005271584	0	1	1	0	0	1	0	0	0	0	1	1	5
hsa-miR-3975	MIMAT0019360	FOXP3	50943	XM_005272610	1	1	0	0	0	1	0	0	0	0	1	1	5
hsa-miR-3975	MIMAT0019360	VPS36	51028	NM_016075	1	1	0	0	0	1	0	0	0	0	1	1	5
hsa-miR-3975	MIMAT0019360	ZBTB7B	51043	NM_001252406	0	1	1	0	0	1	0	0	0	0	1	1	5
hsa-miR-3975	MIMAT0019360	SEPSECS	51091	XM_005248167	1	1	0	0	0	1	0	0	0	0	1	1	5
hsa-miR-3975	MIMAT0019360	SAR1B	51128	NM_001033503	1	1	0	0	0	1	0	0	0	0	1	1	5
hsa-miR-3975	MIMAT0019360	HN1	51155	NM_001002033	1	1	0	0	0	1	0	0	0	0	1	1	5
hsa-miR-3975	MIMAT0019360	DCTN4	51164	NM_001135644	0	1	1	0	0	1	0	0	0	0	1	1	5
hsa-miR-3975	MIMAT0019360	FAM203A	51236	NM_016458	1	1	0	0	0	1	0	0	0	0	1	1	5
hsa-miR-3975	MIMAT0019360	SHISA5	51246	NM_001272068	1	1	0	0	0	1	0	0	0	0	1	1	5
hsa-miR-3975	MIMAT0019360	TMEM216	51259	NM_001173991	1	1	0	0	0	1	0	0	0	0	1	1	5
hsa-miR-3975	MIMAT0019360	REEP2	51308	NM_001271803	1	1	0	0	0	1	0	0	0	0	1	1	5
hsa-miR-3975	MIMAT0019360	MRPL35	51318	NM_016622	1	1	0	0	0	1	0	0	0	0	1	1	5
hsa-miR-3975	MIMAT0019360	TNFRSF12A	51330	NM_016639	1	1	0	0	0	1	0	0	0	0	1	1	5
hsa-miR-3975	MIMAT0019360	AMOTL2	51421	NM_016201	1	1	0	0	0	1	0	0	0	0	1	1	5
hsa-miR-3975	MIMAT0019360	SCARA3	51435	XM_005273527	1	1	0	0	0	1	0	0	0	0	1	1	5
hsa-miR-3975	MIMAT0019360	ANKFY1	51479	NM_001257999	1	1	0	0	0	1	0	0	0	0	1	1	5
hsa-miR-3975	MIMAT0019360	ETV7	51513	NM_001207037	1	1	0	0	0	1	0	0	0	0	1	1	5
hsa-miR-3975	MIMAT0019360	RAB6B	51560	NM_016577	1	1	0	0	0	1	0	0	0	0	1	1	5
hsa-miR-3975	MIMAT0019360	HDAC7	51564	NM_015401	1	1	0	0	0	1	0	0	0	0	1	1	5
hsa-miR-3975	MIMAT0019360	MED15	51586	XM_005261629	1	1	0	0	0	1	0	0	0	0	1	1	5
hsa-miR-3975	MIMAT0019360	KLF13	51621	NM_015995	1	1	0	0	0	1	0	0	0	0	1	1	5
hsa-miR-3975	MIMAT0019360	SUFU	51684	NM_016169	1	1	0	0	0	1	0	0	0	0	1	1	5
hsa-miR-3975	MIMAT0019360	PADI3	51702	NM_016233	0	1	1	0	0	1	0	0	0	0	1	1	5
hsa-miR-3975	MIMAT0019360	GPRC5B	51704	XM_005255357	0	1	1	0	0	1	0	0	0	0	1	1	5
hsa-miR-3975	MIMAT0019360	ADAM22	53616	XM_005250444	0	1	1	0	0	1	0	0	0	0	1	1	5
hsa-miR-3975	MIMAT0019360	TSPEAR	54084	NM_001272037	1	1	0	0	0	1	0	0	0	0	1	1	5
hsa-miR-3975	MIMAT0019360	GPR88	54112	NM_022049	1	1	0	0	0	1	0	0	0	0	1	1	5
hsa-miR-3975	MIMAT0019360	C21orf91	54149	NM_001100420	1	1	0	0	0	1	0	0	0	0	1	1	5
hsa-miR-3975	MIMAT0019360	SIAE	54414	NM_001199922	1	1	0	0	0	1	0	0	0	0	1	1	5
hsa-miR-3975	MIMAT0019360	ANLN	54443	NM_018685	1	1	0	0	0	1	0	0	0	0	1	1	5
hsa-miR-3975	MIMAT0019360	PRR13	54458	NM_018457	1	1	0	0	0	1	0	0	0	0	1	1	5
hsa-miR-3975	MIMAT0019360	NEURL1B	54492	NM_001142651	0	1	1	0	0	1	0	0	0	0	1	1	5
hsa-miR-3975	MIMAT0019360	MTMR12	54545	XM_005248313	0	1	1	0	0	1	0	0	0	0	1	1	5
hsa-miR-3975	MIMAT0019360	SDK2	54549	NM_001144952	1	1	0	0	0	1	0	0	0	0	1	1	5
hsa-miR-3975	MIMAT0019360	EPB41L4B	54566	NM_019114	0	1	1	0	0	1	0	0	0	0	1	1	5
hsa-miR-3975	MIMAT0019360	MXRA8	54587	NM_032348	1	1	0	0	0	1	0	0	0	0	1	1	5
hsa-miR-3975	MIMAT0019360	INO80	54617	NM_017553	1	1	0	0	0	1	0	0	0	0	1	1	5
hsa-miR-3975	MIMAT0019360	MAP10	54627	NM_019090	1	1	0	0	0	1	0	0	0	0	1	1	5
hsa-miR-3975	MIMAT0019360	TBC1D13	54662	NM_018201	1	1	0	0	0	1	0	0	0	0	1	1	5
hsa-miR-3975	MIMAT0019360	SLC35F2	54733	NM_017515	1	1	0	0	0	1	0	0	0	0	1	1	5
hsa-miR-3975	MIMAT0019360	LEPROT	54741	XM_005270951	1	1	0	0	0	1	0	0	0	0	1	1	5
hsa-miR-3975	MIMAT0019360	BNC2	54796	XM_005251489	1	1	0	0	0	1	0	0	0	0	1	1	5
hsa-miR-3975	MIMAT0019360	BCAS3	54828	XM_005257473	1	1	0	0	0	1	0	0	0	0	1	1	5
hsa-miR-3975	MIMAT0019360	MFSD6	54842	NM_017694	0	1	1	0	0	1	0	0	0	0	1	1	5
hsa-miR-3975	MIMAT0019360	FAM46C	54855	XM_005270960	1	1	0	0	0	1	0	0	0	0	1	1	5
hsa-miR-3975	MIMAT0019360	GPATCH4	54865	NM_182679	1	1	0	0	0	1	0	0	0	0	1	1	5
hsa-miR-3975	MIMAT0019360	FNBP1L	54874	NM_001024948	0	1	1	0	0	1	0	0	0	0	1	1	5
hsa-miR-3975	MIMAT0019360	ZCCHC2	54877	NM_017742	1	1	0	0	0	1	0	0	0	0	1	1	5
hsa-miR-3975	MIMAT0019360	DPP8	54878	XM_005254500	1	1	0	0	0	1	0	0	0	0	1	1	5
hsa-miR-3975	MIMAT0019360	RETSAT	54884	NM_017750	1	1	0	0	0	1	0	0	0	0	1	1	5
hsa-miR-3975	MIMAT0019360	PQLC2	54896	NM_001040125	1	1	0	0	0	1	0	0	0	0	1	1	5
hsa-miR-3975	MIMAT0019360	CASZ1	54897	NM_001079843	1	1	0	0	0	1	0	0	0	0	1	1	5
hsa-miR-3975	MIMAT0019360	MKS1	54903	NM_017777	1	1	0	0	0	1	0	0	0	0	1	1	5
hsa-miR-3975	MIMAT0019360	FAM120C	54954	NM_017848	1	1	0	0	0	1	0	0	0	0	1	1	5
hsa-miR-3975	MIMAT0019360	TXNL4B	54957	NM_017853	1	1	0	0	0	1	0	0	0	0	1	1	5
hsa-miR-3975	MIMAT0019360	SSH3	54961	XM_005274072	1	1	0	0	0	1	0	0	0	0	1	1	5
hsa-miR-3975	MIMAT0019360	SLC25A38	54977	NM_017875	0	1	1	0	0	1	0	0	0	0	1	1	5
hsa-miR-3975	MIMAT0019360	SOBP	55084	NM_018013	1	1	0	0	0	1	0	0	0	0	1	1	5
hsa-miR-3975	MIMAT0019360	CXorf57	55086	NM_018015	1	1	0	0	0	1	0	0	0	0	1	1	5
hsa-miR-3975	MIMAT0019360	MED9	55090	NM_018019	1	1	0	0	0	1	0	0	0	0	1	1	5
hsa-miR-3975	MIMAT0019360	ATG2B	55102	NM_018036	1	1	0	0	0	1	0	0	0	0	1	1	5
hsa-miR-3975	MIMAT0019360	AGGF1	55109	NM_018046	1	1	0	0	0	1	0	0	0	0	1	1	5
hsa-miR-3975	MIMAT0019360	XKR8	55113	NM_018053	1	1	0	0	0	1	0	0	0	0	1	1	5
hsa-miR-3975	MIMAT0019360	PRPF38B	55119	NM_018061	1	1	0	0	0	1	0	0	0	0	1	1	5
hsa-miR-3975	MIMAT0019360	ANO10	55129	NM_001204831	1	1	0	0	0	1	0	0	0	0	1	1	5
hsa-miR-3975	MIMAT0019360	FIGN	55137	XM_005246661	1	1	1	0	0	0	0	0	0	0	1	1	5
hsa-miR-3975	MIMAT0019360	TMEM38B	55151	NM_018112	0	1	1	0	0	1	0	0	0	0	1	1	5
hsa-miR-3975	MIMAT0019360	ARMC1	55156	XM_005251263	1	1	0	0	0	1	0	0	0	0	1	1	5
hsa-miR-3975	MIMAT0019360	LEPREL1	55214	NM_018192	1	1	0	0	0	1	0	0	0	0	1	1	5
hsa-miR-3975	MIMAT0019360	ETNK2	55224	NM_018208	1	1	0	0	0	1	0	0	0	0	1	1	5
hsa-miR-3975	MIMAT0019360	LRRC1	55227	XM_005249207	1	1	0	0	0	1	0	0	0	0	1	1	5
hsa-miR-3975	MIMAT0019360	RBM41	55285	XM_005262160	1	1	1	0	0	0	0	0	0	0	1	1	5
hsa-miR-3975	MIMAT0019360	SPTLC3	55304	NM_018327	0	1	1	0	0	1	0	0	0	0	1	1	5
hsa-miR-3975	MIMAT0019360	YOD1	55432	NM_001276320	1	1	0	0	0	1	0	0	0	0	1	1	5
hsa-miR-3975	MIMAT0019360	STRADB	55437	NM_001206864	1	1	0	0	0	1	0	0	0	0	1	1	5
hsa-miR-3975	MIMAT0019360	DNAJA4	55466	NM_018602	1	1	0	0	0	1	0	0	0	0	1	1	5
hsa-miR-3975	MIMAT0019360	ELMOD1	55531	NM_018712	1	1	0	0	0	1	0	0	0	0	1	1	5
hsa-miR-3975	MIMAT0019360	SOX6	55553	NM_017508	1	1	0	0	0	1	0	0	0	0	1	1	5
hsa-miR-3975	MIMAT0019360	FERMT1	55612	NM_017671	0	1	1	0	0	1	0	0	0	0	1	1	5
hsa-miR-3975	MIMAT0019360	SLC30A6	55676	NM_001193513	0	1	1	0	0	1	0	0	0	0	1	1	5
hsa-miR-3975	MIMAT0019360	TRMU	55687	NM_018006	1	1	0	0	0	1	0	0	0	0	1	1	5
hsa-miR-3975	MIMAT0019360	PACS1	55690	NM_018026	1	1	0	0	0	1	0	0	0	0	1	1	5
hsa-miR-3975	MIMAT0019360	NSUN5	55695	NM_018044	1	1	0	0	0	1	0	0	0	0	1	1	5
hsa-miR-3975	MIMAT0019360	DOK4	55715	NM_018110	1	1	0	0	0	1	0	0	0	0	1	1	5
hsa-miR-3975	MIMAT0019360	TSR1	55720	NM_018128	1	1	0	0	0	1	0	0	0	0	1	1	5
hsa-miR-3975	MIMAT0019360	HHAT	55733	NM_018194	1	1	0	0	0	1	0	0	0	0	1	1	5
hsa-miR-3975	MIMAT0019360	RCOR3	55758	NM_001136223	0	1	1	0	0	1	0	0	0	0	1	1	5
hsa-miR-3975	MIMAT0019360	TTC17	55761	XM_005253016	0	1	1	0	0	1	0	0	0	0	1	1	5
hsa-miR-3975	MIMAT0019360	WDR52	55779	NM_001164496	1	1	0	0	0	1	0	0	0	0	1	1	5
hsa-miR-3975	MIMAT0019360	MBNL3	55796	XM_005262434	1	1	0	0	0	1	0	0	0	0	1	1	5
hsa-miR-3975	MIMAT0019360	UNC45A	55898	NM_001039675	1	1	0	0	0	1	0	0	0	0	1	1	5
hsa-miR-3975	MIMAT0019360	ACSS2	55902	XM_005260455	1	1	0	0	0	1	0	0	0	0	1	1	5
hsa-miR-3975	MIMAT0019360	ERBB2IP	55914	NM_001253699	1	1	0	0	0	1	0	0	0	0	1	1	5
hsa-miR-3975	MIMAT0019360	CTTNBP2NL	55917	XM_005271034	1	1	0	0	0	1	0	0	0	0	1	1	5
hsa-miR-3975	MIMAT0019360	MOSPD1	56180	XM_005262445	0	1	1	0	0	1	0	0	0	0	1	1	5
hsa-miR-3975	MIMAT0019360	LRRC8A	56262	XM_005252094	0	1	1	0	0	1	0	0	0	0	1	1	5
hsa-miR-3975	MIMAT0019360	CTPS2	56474	NM_001144002	1	1	0	0	0	1	0	0	0	0	1	1	5
hsa-miR-3975	MIMAT0019360	CYP26B1	56603	NM_019885	1	1	0	0	0	1	0	0	0	0	1	1	5
hsa-miR-3975	MIMAT0019360	TMEM9B	56674	NM_020644	1	1	0	0	0	1	0	0	0	0	1	1	5
hsa-miR-3975	MIMAT0019360	AGPAT4	56895	NM_020133	1	1	0	0	0	1	0	0	0	0	1	1	5
hsa-miR-3975	MIMAT0019360	DHX33	56919	NM_020162	1	1	0	0	0	1	0	0	0	0	1	1	5
hsa-miR-3975	MIMAT0019360	CA10	56934	NM_001082533	1	1	0	0	0	1	0	0	0	0	1	1	5
hsa-miR-3975	MIMAT0019360	ENY2	56943	NM_020189	0	1	1	0	0	1	0	0	0	0	1	1	5
hsa-miR-3975	MIMAT0019360	ATXN7L3	56970	XM_005257526	1	1	0	0	0	1	0	0	0	0	1	1	5
hsa-miR-3975	MIMAT0019360	PARP11	57097	NM_020367	1	1	0	0	0	1	0	0	0	0	1	1	5
hsa-miR-3975	MIMAT0019360	PDSS2	57107	NM_020381	1	1	0	0	0	1	0	0	0	0	1	1	5
hsa-miR-3975	MIMAT0019360	TMEM159	57146	XM_005255438	1	1	0	0	0	1	0	0	0	0	1	1	5
hsa-miR-3975	MIMAT0019360	KIAA1191	57179	NM_020444	1	1	0	0	0	1	0	0	0	0	1	1	5
hsa-miR-3975	MIMAT0019360	FAM219B	57184	NM_020447	1	1	0	0	0	1	0	0	0	0	1	1	5
hsa-miR-3975	MIMAT0019360	SLC45A4	57210	XM_005251001	1	1	0	0	0	1	0	0	0	0	1	1	5
hsa-miR-3975	MIMAT0019360	TTC7A	57217	NM_020458	1	1	0	0	0	1	0	0	0	0	1	1	5
hsa-miR-3975	MIMAT0019360	SENP7	57337	NM_020654	1	1	0	0	0	1	0	0	0	0	1	1	5
hsa-miR-3975	MIMAT0019360	JPH3	57338	NM_020655	1	1	0	0	0	1	0	0	0	0	1	1	5
hsa-miR-3975	MIMAT0019360	GALNT16	57452	NM_001168368	1	1	0	0	0	1	0	0	0	0	1	1	5
hsa-miR-3975	MIMAT0019360	GATAD2B	57459	NM_020699	0	1	1	0	0	1	0	0	0	0	1	1	5
hsa-miR-3975	MIMAT0019360	ISY1	57461	NM_001199469	1	1	0	0	0	1	0	0	0	0	1	1	5
hsa-miR-3975	MIMAT0019360	MAVS	57506	NM_020746	1	1	1	0	0	0	0	0	0	0	1	1	5
hsa-miR-3975	MIMAT0019360	XPO5	57510	NM_020750	1	1	0	0	0	1	0	0	0	0	1	1	5
hsa-miR-3975	MIMAT0019360	ARHGAP31	57514	NM_020754	1	1	0	0	0	1	0	0	0	0	1	1	5
hsa-miR-3975	MIMAT0019360	MIB1	57534	NM_020774	1	1	0	0	0	1	0	0	0	0	1	1	5
hsa-miR-3975	MIMAT0019360	KIAA1324	57535	NM_020775	1	1	1	0	0	0	0	0	0	0	1	1	5
hsa-miR-3975	MIMAT0019360	PTCHD2	57540	XM_005263486	1	1	0	0	0	1	0	0	0	0	1	1	5
hsa-miR-3975	MIMAT0019360	ZNF398	57541	NM_020781	1	1	0	0	0	1	0	0	0	0	1	1	5
hsa-miR-3975	MIMAT0019360	TAOK1	57551	NM_020791	1	1	0	0	0	1	0	0	0	0	1	1	5
hsa-miR-3975	MIMAT0019360	KCNT1	57582	XM_005263407	1	1	0	0	0	1	0	0	0	0	1	1	5
hsa-miR-3975	MIMAT0019360	TMEM181	57583	NM_020823	1	1	0	0	0	1	0	0	0	0	1	1	5
hsa-miR-3975	MIMAT0019360	PITPNM2	57605	XM_005253583	1	1	0	0	0	1	0	0	0	0	1	1	5
hsa-miR-3975	MIMAT0019360	ZSWIM5	57643	NM_020883	0	1	1	0	0	1	0	0	0	0	1	1	5
hsa-miR-3975	MIMAT0019360	RNF213	57674	NM_001256071	1	1	0	0	0	1	0	0	0	0	1	1	5
hsa-miR-3975	MIMAT0019360	ZFP14	57677	NM_020917	1	1	1	0	0	0	0	0	0	0	1	1	5
hsa-miR-3975	MIMAT0019360	CHD8	57680	XM_005267924	0	1	1	0	0	1	0	0	0	0	1	1	5
hsa-miR-3975	MIMAT0019360	ZSWIM6	57688	NM_020928	1	1	0	0	0	1	0	0	0	0	1	1	5
hsa-miR-3975	MIMAT0019360	ZNF317	57693	NM_020933	1	1	0	0	0	1	0	0	0	0	1	1	5
hsa-miR-3975	MIMAT0019360	IGDCC4	57722	NM_020962	1	1	0	0	0	1	0	0	0	0	1	1	5
hsa-miR-3975	MIMAT0019360	MARK4	57787	NM_031417	0	1	1	0	0	1	0	0	0	0	1	1	5
hsa-miR-3975	MIMAT0019360	NGB	58157	NM_021257	0	1	1	0	0	1	0	0	0	0	1	1	5
hsa-miR-3975	MIMAT0019360	NEUROD4	58158	NM_021191	1	1	0	0	0	1	0	0	0	0	1	1	5
hsa-miR-3975	MIMAT0019360	CREBZF	58487	NM_001039618	1	1	1	0	0	0	0	0	0	0	1	1	5
hsa-miR-3975	MIMAT0019360	RPRD1B	58490	NM_021215	1	1	0	0	0	1	0	0	0	0	1	1	5
hsa-miR-3975	MIMAT0019360	PRUNE	58497	NM_021222	1	1	0	0	0	1	0	0	0	0	1	1	5
hsa-miR-3975	MIMAT0019360	WIZ	58525	XM_005260004	1	1	0	0	0	1	0	0	0	0	1	1	5
hsa-miR-3975	MIMAT0019360	MID1IP1	58526	NM_021242	0	1	1	0	0	1	0	0	0	0	1	1	5
hsa-miR-3975	MIMAT0019360	SNX6	58533	XM_005267957	0	1	1	0	0	1	0	0	0	0	1	1	5
hsa-miR-3975	MIMAT0019360	IL22RA1	58985	XM_005245952	1	1	0	0	0	1	0	0	0	0	1	1	5
hsa-miR-3975	MIMAT0019360	TMEM35	59353	NM_021637	1	1	0	0	0	1	0	0	0	0	1	1	5
hsa-miR-3975	MIMAT0019360	ELOVL5	60481	XM_005249267	0	1	1	0	0	1	0	0	0	0	1	1	5
hsa-miR-3975	MIMAT0019360	ALX4	60529	NM_021926	1	1	0	0	0	1	0	0	0	0	1	1	5
hsa-miR-3975	MIMAT0019360	CELF5	60680	NM_001172673	1	1	0	0	0	1	0	0	0	0	1	1	5
hsa-miR-3975	MIMAT0019360	SLC17A9	63910	XM_005260227	1	1	0	0	0	1	0	0	0	0	1	1	5
hsa-miR-3975	MIMAT0019360	XYLT1	64131	NM_022166	1	1	0	0	0	1	0	0	0	0	1	1	5
hsa-miR-3975	MIMAT0019360	PDLIM2	64236	NM_176871	1	1	0	0	0	1	0	0	0	0	1	1	5
hsa-miR-3975	MIMAT0019360	PAPD5	64282	NM_001040284	1	1	0	0	0	1	0	0	0	0	1	1	5
hsa-miR-3975	MIMAT0019360	LMBR1	64327	XM_005249554	1	1	0	0	0	1	0	0	0	0	1	1	5
hsa-miR-3975	MIMAT0019360	HIF3A	64344	XM_005259152	1	1	0	0	0	1	0	0	0	0	1	1	5
hsa-miR-3975	MIMAT0019360	ATG3	64422	NM_001278712	1	1	0	0	0	1	0	0	0	0	1	1	5
hsa-miR-3975	MIMAT0019360	TTC31	64427	XM_005264493	1	1	0	0	0	1	0	0	0	0	1	1	5
hsa-miR-3975	MIMAT0019360	NUCKS1	64710	NM_022731	1	1	0	0	0	1	0	0	0	0	1	1	5
hsa-miR-3975	MIMAT0019360	LPPR2	64748	NM_022737	1	1	0	0	0	1	0	0	0	0	1	1	5
hsa-miR-3975	MIMAT0019360	CCDC136	64753	NM_022742	1	1	0	0	0	1	0	0	0	0	1	1	5
hsa-miR-3975	MIMAT0019360	S100PBP	64766	XM_005271121	0	1	1	0	0	1	0	0	0	0	1	1	5
hsa-miR-3975	MIMAT0019360	RMND5B	64777	XM_005265968	1	1	0	0	0	1	0	0	0	0	1	1	5
hsa-miR-3975	MIMAT0019360	CEP85	64793	NM_022778	1	1	0	0	0	1	0	0	0	0	1	1	5
hsa-miR-3975	MIMAT0019360	FNDC4	64838	NM_022823	1	1	0	0	0	1	0	0	0	0	1	1	5
hsa-miR-3975	MIMAT0019360	REEP1	65055	XM_005264502	1	1	0	0	0	1	0	0	0	0	1	1	5
hsa-miR-3975	MIMAT0019360	RAPH1	65059	NM_213589	1	1	0	0	0	1	0	0	0	0	1	1	5
hsa-miR-3975	MIMAT0019360	PYCRL	65263	NM_023078	1	1	0	0	0	1	0	0	0	0	1	1	5
hsa-miR-3975	MIMAT0019360	CAPRIN2	65981	NM_032156	0	1	1	0	0	1	0	0	0	0	1	1	5
hsa-miR-3975	MIMAT0019360	KCTD14	65987	NM_023930	1	1	0	0	0	1	0	0	0	0	1	1	5
hsa-miR-3975	MIMAT0019360	LYNX1	66004	NM_177457	1	1	0	0	0	1	0	0	0	0	1	1	5
hsa-miR-3975	MIMAT0019360	MTMR9	66036	NM_015458	1	1	0	0	0	1	0	0	0	0	1	1	5
hsa-miR-3975	MIMAT0019360	DDX54	79039	NM_001111322	1	1	0	0	0	1	0	0	0	0	1	1	5
hsa-miR-3975	MIMAT0019360	PRRG3	79057	XM_005274747	0	1	1	0	0	1	0	0	0	0	1	1	5
hsa-miR-3975	MIMAT0019360	DCTPP1	79077	NM_024096	0	1	1	0	0	1	0	0	0	0	1	1	5
hsa-miR-3975	MIMAT0019360	MAPKAP1	79109	XM_005252203	1	1	0	0	0	1	0	0	0	0	1	1	5
hsa-miR-3975	MIMAT0019360	TMEM185B	79134	NM_024121	1	1	1	0	0	0	0	0	0	0	1	1	5
hsa-miR-3975	MIMAT0019360	FAM134A	79137	NM_024293	1	1	0	0	0	1	0	0	0	0	1	1	5
hsa-miR-3975	MIMAT0019360	PHF23	79142	NM_024297	1	1	0	0	0	1	0	0	0	0	1	1	5
hsa-miR-3975	MIMAT0019360	CENPO	79172	NM_001199803	1	1	0	0	0	1	0	0	0	0	1	1	5
hsa-miR-3975	MIMAT0019360	FYCO1	79443	XM_005265483	1	1	0	0	0	1	0	0	0	0	1	1	5
hsa-miR-3975	MIMAT0019360	ADIPOR2	79602	XM_005253790	1	1	0	0	0	1	0	0	0	0	1	1	5
hsa-miR-3975	MIMAT0019360	RIC3	79608	NM_001206671	0	1	1	0	0	1	0	0	0	0	1	1	5
hsa-miR-3975	MIMAT0019360	HMBOX1	79618	XM_005273634	1	1	1	0	0	0	0	0	0	0	1	1	5
hsa-miR-3975	MIMAT0019360	AKIRIN1	79647	NM_024595	0	1	1	0	0	1	0	0	0	0	1	1	5
hsa-miR-3975	MIMAT0019360	OGFOD2	79676	NM_024623	1	1	0	0	0	1	0	0	0	0	1	1	5
hsa-miR-3975	MIMAT0019360	CXorf36	79742	NM_176819	1	1	0	0	0	1	0	0	0	0	1	1	5
hsa-miR-3975	MIMAT0019360	C12orf49	79794	XM_005253937	1	1	0	0	0	1	0	0	0	0	1	1	5
hsa-miR-3975	MIMAT0019360	MOB3B	79817	NM_024761	0	1	1	0	0	1	0	0	0	0	1	1	5
hsa-miR-3975	MIMAT0019360	FAM124B	79843	NM_024785	0	1	1	0	0	1	0	0	0	0	1	1	5
hsa-miR-3975	MIMAT0019360	DOK3	79930	XM_005265986	1	1	0	0	0	1	0	0	0	0	1	1	5
hsa-miR-3975	MIMAT0019360	PHF17	79960	XM_005263230	1	1	0	0	0	1	0	0	0	0	1	1	5
hsa-miR-3975	MIMAT0019360	ATAT1	79969	XM_005249420	1	1	0	0	0	1	0	0	0	0	1	1	5
hsa-miR-3975	MIMAT0019360	WLS	79971	NM_024911	0	1	1	0	0	1	0	0	0	0	1	1	5
hsa-miR-3975	MIMAT0019360	GRHL2	79977	NM_024915	1	1	0	0	0	1	0	0	0	0	1	1	5
hsa-miR-3975	MIMAT0019360	TTC26	79989	XM_005250608	1	1	0	0	0	1	0	0	0	0	1	1	5
hsa-miR-3975	MIMAT0019360	ESRP2	80004	NM_024939	1	1	0	0	0	1	0	0	0	0	1	1	5
hsa-miR-3975	MIMAT0019360	DOCK5	80005	XM_005273650	1	1	0	0	0	1	0	0	0	0	1	1	5
hsa-miR-3975	MIMAT0019360	FAM192A	80011	XM_005256156	1	1	0	0	0	1	0	0	0	0	1	1	5
hsa-miR-3975	MIMAT0019360	LRRTM4	80059	NM_024993	1	1	0	0	0	1	0	0	0	0	1	1	5
hsa-miR-3975	MIMAT0019360	FRAS1	80144	NM_025074	1	1	0	0	0	1	0	0	0	0	1	1	5
hsa-miR-3975	MIMAT0019360	NAA50	80218	NM_025146	1	1	1	0	0	0	0	0	0	0	1	1	5
hsa-miR-3975	MIMAT0019360	RUFY1	80230	NM_001040451	1	1	0	0	0	1	0	0	0	0	1	1	5
hsa-miR-3975	MIMAT0019360	FAM214B	80256	XM_005251588	1	1	0	0	0	1	0	0	0	0	1	1	5
hsa-miR-3975	MIMAT0019360	PLEKHO2	80301	NM_025201	1	1	0	0	0	1	0	0	0	0	1	1	5
hsa-miR-3975	MIMAT0019360	LRRC27	80313	NM_001143757	1	1	0	0	0	1	0	0	0	0	1	1	5
hsa-miR-3975	MIMAT0019360	DNAJC5	80331	NM_025219	1	1	0	0	0	1	0	0	0	0	1	1	5
hsa-miR-3975	MIMAT0019360	AKNA	80709	NM_030767	1	1	0	0	0	1	0	0	0	0	1	1	5
hsa-miR-3975	MIMAT0019360	C6orf25	80739	NM_138277	1	1	0	0	0	1	0	0	0	0	1	1	5
hsa-miR-3975	MIMAT0019360	SETD7	80854	NM_030648	1	1	0	0	0	1	0	0	0	0	1	1	5
hsa-miR-3975	MIMAT0019360	TMPRSS5	80975	XM_005271683	0	1	1	0	0	1	0	0	0	0	1	1	5
hsa-miR-3975	MIMAT0019360	PTDSS2	81490	NM_030783	1	1	0	0	0	1	0	0	0	0	1	1	5
hsa-miR-3975	MIMAT0019360	SLC38A1	81539	NM_001278387	1	1	0	0	0	1	0	0	0	0	1	1	5
hsa-miR-3975	MIMAT0019360	NDEL1	81565	XM_005256805	0	1	1	0	0	1	0	0	0	0	1	1	5
hsa-miR-3975	MIMAT0019360	TRIM8	81603	NM_030912	1	1	0	0	0	1	0	0	0	0	1	1	5
hsa-miR-3975	MIMAT0019360	LOC81691	81691	NM_001199053	0	1	1	0	0	1	0	0	0	0	1	1	5
hsa-miR-3975	MIMAT0019360	PPP1R14C	81706	NM_030949	1	1	0	0	0	1	0	0	0	0	1	1	5
hsa-miR-3975	MIMAT0019360	TRIM7	81786	NM_203297	1	1	0	0	0	1	0	0	0	0	1	1	5
hsa-miR-3975	MIMAT0019360	VANGL1	81839	NM_138959	1	1	0	0	0	1	0	0	0	0	1	1	5
hsa-miR-3975	MIMAT0019360	GUCD1	83606	NM_031444	1	1	0	0	0	1	0	0	0	0	1	1	5
hsa-miR-3975	MIMAT0019360	SH3BGRL2	83699	NM_031469	1	1	0	0	0	1	0	0	0	0	1	1	5
hsa-miR-3975	MIMAT0019360	JAM3	83700	NM_032801	1	1	0	0	0	1	0	0	0	0	1	1	5
hsa-miR-3975	MIMAT0019360	MARVELD1	83742	NM_031484	1	1	0	0	0	1	0	0	0	0	1	1	5
hsa-miR-3975	MIMAT0019360	STK40	83931	NM_032017	1	1	0	0	0	1	0	0	0	0	1	1	5
hsa-miR-3975	MIMAT0019360	ASCC2	84164	XM_005261776	1	1	0	0	0	1	0	0	0	0	1	1	5
hsa-miR-3975	MIMAT0019360	TMEM164	84187	XM_005262206	0	1	1	0	0	1	0	0	0	0	1	1	5
hsa-miR-3975	MIMAT0019360	PSD2	84249	NM_032289	1	1	0	0	0	1	0	0	0	0	1	1	5
hsa-miR-3975	MIMAT0019360	CAMKK1	84254	XM_005256817	1	1	0	0	0	1	0	0	0	0	1	1	5
hsa-miR-3975	MIMAT0019360	LCOR	84458	NM_032440	1	1	0	0	0	1	0	0	0	0	1	1	5
hsa-miR-3975	MIMAT0019360	ZMAT1	84460	XM_005262212	0	1	1	0	0	1	0	0	0	0	1	1	5
hsa-miR-3975	MIMAT0019360	SLX4	84464	NM_032444	1	1	0	0	0	1	0	0	0	0	1	1	5
hsa-miR-3975	MIMAT0019360	DCTN5	84516	NM_001199743	1	1	1	0	0	0	0	0	0	0	1	1	5
hsa-miR-3975	MIMAT0019360	SLC12A8	84561	NM_024628	0	1	1	0	0	1	0	0	0	0	1	1	5
hsa-miR-3975	MIMAT0019360	ST6GAL2	84620	NM_032528	1	1	0	0	0	1	0	0	0	0	1	1	5
hsa-miR-3975	MIMAT0019360	ACCS	84680	XM_005253173	1	1	0	0	0	1	0	0	0	0	1	1	5
hsa-miR-3975	MIMAT0019360	LOXL3	84695	NM_032603	1	1	0	0	0	1	0	0	0	0	1	1	5
hsa-miR-3975	MIMAT0019360	CBX2	84733	NM_005189	1	1	0	0	0	1	0	0	0	0	1	1	5
hsa-miR-3975	MIMAT0019360	FCRLA	84824	NM_001184866	1	1	0	0	0	1	0	0	0	0	1	1	5
hsa-miR-3975	MIMAT0019360	CEP89	84902	XM_005259343	0	1	1	0	0	1	0	0	0	0	1	1	5
hsa-miR-3975	MIMAT0019360	ZNF341	84905	XM_005260584	0	1	1	0	0	1	0	0	0	0	1	1	5
hsa-miR-3975	MIMAT0019360	PPP1R15B	84919	NM_032833	0	1	1	0	0	1	0	0	0	0	1	1	5
hsa-miR-3975	MIMAT0019360	ZNRF1	84937	NM_032268	0	1	1	0	0	1	0	0	0	0	1	1	5
hsa-miR-3975	MIMAT0019360	TNS4	84951	XM_005257744	1	1	0	0	0	1	0	0	0	0	1	1	5
hsa-miR-3975	MIMAT0019360	ATCAY	85300	NM_033064	1	1	0	0	0	1	0	0	0	0	1	1	5
hsa-miR-3975	MIMAT0019360	KIAA1644	85352	XM_005261790	0	1	1	0	0	1	0	0	0	0	1	1	5
hsa-miR-3975	MIMAT0019360	NKD1	85407	NM_033119	1	1	1	0	0	0	0	0	0	0	1	1	5
hsa-miR-3975	MIMAT0019360	SSH2	85464	XM_005258058	1	1	0	0	0	1	0	0	0	0	1	1	5
hsa-miR-3975	MIMAT0019360	SSH2	85464	XM_005258059	1	1	0	0	0	1	0	0	0	0	1	1	5
hsa-miR-3975	MIMAT0019360	FRMD7	90167	NM_194277	1	1	0	0	0	1	0	0	0	0	1	1	5
hsa-miR-3975	MIMAT0019360	TICRR	90381	NM_152259	1	1	0	0	0	1	0	0	0	0	1	1	5
hsa-miR-3975	MIMAT0019360	KNSTRN	90417	NM_001142761	1	1	0	0	0	1	0	0	0	0	1	1	5
hsa-miR-3975	MIMAT0019360	CERS5	91012	NM_147190	0	1	1	0	0	1	0	0	0	0	1	1	5
hsa-miR-3975	MIMAT0019360	SESTD1	91404	NM_178123	1	1	0	0	0	1	0	0	0	0	1	1	5
hsa-miR-3975	MIMAT0019360	BTF3L4	91408	NM_152265	1	1	0	0	0	1	0	0	0	0	1	1	5
hsa-miR-3975	MIMAT0019360	RNF185	91445	NM_152267	0	1	1	0	0	1	0	0	0	0	1	1	5
hsa-miR-3975	MIMAT0019360	PKDCC	91461	NM_138370	1	1	0	0	0	1	0	0	0	0	1	1	5
hsa-miR-3975	MIMAT0019360	OXNAD1	92106	NM_138381	1	1	0	0	0	1	0	0	0	0	1	1	5
hsa-miR-3975	MIMAT0019360	MRPS36	92259	NM_033281	1	1	0	0	0	1	0	0	0	0	1	1	5
hsa-miR-3975	MIMAT0019360	STRADA	92335	XM_005257802	1	1	0	0	0	1	0	0	0	0	1	1	5
hsa-miR-3975	MIMAT0019360	PGAP3	93210	NM_033419	1	1	0	0	0	1	0	0	0	0	1	1	5
hsa-miR-3975	MIMAT0019360	OPALIN	93377	NM_001040103	1	1	0	0	0	1	0	0	0	0	1	1	5
hsa-miR-3975	MIMAT0019360	ARHGAP18	93663	XM_005267212	1	1	0	0	0	1	0	0	0	0	1	1	5
hsa-miR-3975	MIMAT0019360	SFXN5	94097	XM_005264646	1	1	0	0	0	1	0	0	0	0	1	1	5
hsa-miR-3975	MIMAT0019360	SNX18	112574	NM_001145427	0	1	1	0	0	1	0	0	0	0	1	1	5
hsa-miR-3975	MIMAT0019360	SLC46A1	113235	NM_080669	1	1	0	0	0	1	0	0	0	0	1	1	5
hsa-miR-3975	MIMAT0019360	CCDC85A	114800	NM_001080433	1	1	0	0	0	1	0	0	0	0	1	1	5
hsa-miR-3975	MIMAT0019360	OSBPL8	114882	XM_005268621	1	1	0	0	0	1	0	0	0	0	1	1	5
hsa-miR-3975	MIMAT0019360	SLC25A26	115286	NM_173471	1	1	0	0	0	1	0	0	0	0	1	1	5
hsa-miR-3975	MIMAT0019360	FCRL1	115350	NM_052938	1	1	0	0	0	1	0	0	0	0	1	1	5
hsa-miR-3975	MIMAT0019360	UHRF2	115426	NM_152896	1	1	0	0	0	1	0	0	0	0	1	1	5
hsa-miR-3975	MIMAT0019360	ABHD15	116236	NM_198147	1	1	0	0	0	1	0	0	0	0	1	1	5
hsa-miR-3975	MIMAT0019360	MRGPRF	116535	NM_001098515	1	1	0	0	0	1	0	0	0	0	1	1	5
hsa-miR-3975	MIMAT0019360	PARD3B	117583	XM_005246273	1	1	0	0	0	1	0	0	0	0	1	1	5
hsa-miR-3975	MIMAT0019360	ZFYVE27	118813	NM_144588	1	1	0	0	0	1	0	0	0	0	1	1	5
hsa-miR-3975	MIMAT0019360	CPXM2	119587	XM_005269528	1	1	0	0	0	1	0	0	0	0	1	1	5
hsa-miR-3975	MIMAT0019360	FAT3	120114	XM_005273759	1	1	0	0	0	1	0	0	0	0	1	1	5
hsa-miR-3975	MIMAT0019360	TMEM132D	121256	NM_133448	1	1	0	0	0	1	0	0	0	0	1	1	5
hsa-miR-3975	MIMAT0019360	ZNF641	121274	NM_152320	1	1	0	0	0	1	0	0	0	0	1	1	5
hsa-miR-3975	MIMAT0019360	PSMB11	122706	NM_001099780	1	1	0	0	0	1	0	0	0	0	1	1	5
hsa-miR-3975	MIMAT0019360	NIPA1	123606	NM_144599	1	1	0	0	0	1	0	0	0	0	1	1	5
hsa-miR-3975	MIMAT0019360	EARS2	124454	NM_001083614	1	1	0	0	0	1	0	0	0	0	1	1	5
hsa-miR-3975	MIMAT0019360	SNX20	124460	NM_153337	0	1	1	0	0	1	0	0	0	0	1	1	5
hsa-miR-3975	MIMAT0019360	ZFP3	124961	NM_153018	0	1	1	0	0	1	0	0	0	0	1	1	5
hsa-miR-3975	MIMAT0019360	RPTN	126638	NM_001122965	1	1	0	0	0	1	0	0	0	0	1	1	5
hsa-miR-3975	MIMAT0019360	GJB4	127534	NM_153212	1	1	0	0	0	1	0	0	0	0	1	1	5
hsa-miR-3975	MIMAT0019360	ZNF648	127665	NM_001009992	1	1	0	0	0	1	0	0	0	0	1	1	5
hsa-miR-3975	MIMAT0019360	SYT2	127833	NM_001136504	1	1	0	0	0	1	0	0	0	0	1	1	5
hsa-miR-3975	MIMAT0019360	ZNF831	128611	XM_005260272	1	1	0	0	0	1	0	0	0	0	1	1	5
hsa-miR-3975	MIMAT0019360	CHMP4B	128866	NM_176812	0	1	1	0	0	1	0	0	0	0	1	1	5
hsa-miR-3975	MIMAT0019360	LYPD6	130574	NM_001195685	1	1	0	0	0	1	0	0	0	0	1	1	5
hsa-miR-3975	MIMAT0019360	M1AP	130951	NM_138804	1	1	0	0	0	1	0	0	0	0	1	1	5
hsa-miR-3975	MIMAT0019360	KCNH8	131096	NM_144633	1	1	0	0	0	1	0	0	0	0	1	1	5
hsa-miR-3975	MIMAT0019360	DNAJC19	131118	NM_001190233	1	1	0	0	0	1	0	0	0	0	1	1	5
hsa-miR-3975	MIMAT0019360	FAM3D	131177	NM_138805	1	1	0	0	0	1	0	0	0	0	1	1	5
hsa-miR-3975	MIMAT0019360	RTP1	132112	NM_153708	1	1	0	0	0	1	0	0	0	0	1	1	5
hsa-miR-3975	MIMAT0019360	LSMEM2	132228	NM_153215	1	1	0	0	0	1	0	0	0	0	1	1	5
hsa-miR-3975	MIMAT0019360	ZNF572	137209	NM_152412	0	1	1	0	0	1	0	0	0	0	1	1	5
hsa-miR-3975	MIMAT0019360	UBXN2B	137886	NM_001077619	0	1	1	0	0	1	0	0	0	0	1	1	5
hsa-miR-3975	MIMAT0019360	HGSNAT	138050	XM_005273409	0	1	1	0	0	1	0	0	0	0	1	1	5
hsa-miR-3975	MIMAT0019360	APOBEC3D	140564	NM_152426	0	1	1	0	0	1	0	0	0	0	1	1	5
hsa-miR-3975	MIMAT0019360	CHODL	140578	NM_024944	0	1	1	0	0	1	0	0	0	0	1	1	5
hsa-miR-3975	MIMAT0019360	TMEM37	140738	XM_005263597	1	1	0	0	0	1	0	0	0	0	1	1	5
hsa-miR-3975	MIMAT0019360	ZSWIM3	140831	NM_080752	1	1	0	0	0	1	0	0	0	0	1	1	5
hsa-miR-3975	MIMAT0019360	STK35	140901	NM_080836	0	1	1	0	0	1	0	0	0	0	1	1	5
hsa-miR-3975	MIMAT0019360	SYT9	143425	NM_175733	1	1	0	0	0	1	0	0	0	0	1	1	5
hsa-miR-3975	MIMAT0019360	SPTY2D1	144108	NM_194285	0	1	1	0	0	1	0	0	0	0	1	1	5
hsa-miR-3975	MIMAT0019360	TMEM86A	144110	NM_153347	1	1	0	0	0	1	0	0	0	0	1	1	5
hsa-miR-3975	MIMAT0019360	FAM101A	144347	NM_181709	1	1	0	0	0	1	0	0	0	0	1	1	5
hsa-miR-3975	MIMAT0019360	CDAN1	146059	NM_138477	1	1	0	0	0	1	0	0	0	0	1	1	5
hsa-miR-3975	MIMAT0019360	MGAT5B	146664	NM_001199172	1	1	0	0	0	1	0	0	0	0	1	1	5
hsa-miR-3975	MIMAT0019360	C17orf50	146853	NM_145272	1	1	0	0	0	1	0	0	0	0	1	1	5
hsa-miR-3975	MIMAT0019360	TMC8	147138	NM_152468	1	1	0	0	0	1	0	0	0	0	1	1	5
hsa-miR-3975	MIMAT0019360	ATP8B3	148229	NM_138813	1	1	0	0	0	1	0	0	0	0	1	1	5
hsa-miR-3975	MIMAT0019360	SYT6	148281	NM_001270805	1	1	0	0	0	1	0	0	0	0	1	1	5
hsa-miR-3975	MIMAT0019360	FAM163A	148753	XM_005244912	1	1	0	0	0	1	0	0	0	0	1	1	5
hsa-miR-3975	MIMAT0019360	RC3H1	149041	NM_172071	1	1	0	0	0	1	0	0	0	0	1	1	5
hsa-miR-3975	MIMAT0019360	PDIK1L	149420	XM_005245743	1	1	0	0	0	1	0	0	0	0	1	1	5
hsa-miR-3975	MIMAT0019360	NFAM1	150372	NM_145912	1	1	0	0	0	1	0	0	0	0	1	1	5
hsa-miR-3975	MIMAT0019360	GPR155	151556	NM_001033045	1	1	0	0	0	1	0	0	0	0	1	1	5
hsa-miR-3975	MIMAT0019360	MBLAC2	153364	NM_203406	1	1	0	0	0	1	0	0	0	0	1	1	5
hsa-miR-3975	MIMAT0019360	CCDC167	154467	NM_138493	1	1	0	0	0	1	0	0	0	0	1	1	5
hsa-miR-3975	MIMAT0019360	AMOTL1	154810	XM_005273798	0	1	1	0	0	1	0	0	0	0	1	1	5
hsa-miR-3975	MIMAT0019360	TMEM229B	161145	XM_005267375	1	1	0	0	0	1	0	0	0	0	1	1	5
hsa-miR-3975	MIMAT0019360	IFNLR1	163702	NM_170743	1	1	0	0	0	1	0	0	0	0	1	1	5
hsa-miR-3975	MIMAT0019360	TTC24	164118	NM_001105669	1	1	0	0	0	1	0	0	0	0	1	1	5
hsa-miR-3975	MIMAT0019360	UBL4B	164153	NM_203412	1	1	0	0	0	1	0	0	0	0	1	1	5
hsa-miR-3975	MIMAT0019360	APCDD1L	164284	XM_005260306	0	1	1	0	0	1	0	0	0	0	1	1	5
hsa-miR-3975	MIMAT0019360	PRICKLE2	166336	NM_198859	1	1	0	0	0	1	0	0	0	0	1	1	5
hsa-miR-3975	MIMAT0019360	ZBTB49	166793	NM_145291	1	1	0	0	0	1	0	0	0	0	1	1	5
hsa-miR-3975	MIMAT0019360	SGMS2	166929	XM_005262793	0	1	1	0	0	1	0	0	0	0	1	1	5
hsa-miR-3975	MIMAT0019360	CCDC71L	168455	NM_175884	1	1	0	0	0	1	0	0	0	0	1	1	5
hsa-miR-3975	MIMAT0019360	AGO4	192670	NM_017629	1	1	0	0	0	1	0	0	0	0	1	1	5
hsa-miR-3975	MIMAT0019360	METTL15	196074	NM_152636	1	1	0	0	0	1	0	0	0	0	1	1	5
hsa-miR-3975	MIMAT0019360	ARID2	196528	NM_152641	1	1	0	0	0	1	0	0	0	0	1	1	5
hsa-miR-3975	MIMAT0019360	TMEM201	199953	NM_001010866	1	1	0	0	0	1	0	0	0	0	1	1	5
hsa-miR-3975	MIMAT0019360	PIKFYVE	200576	NM_015040	0	1	1	0	0	1	0	0	0	0	1	1	5
hsa-miR-3975	MIMAT0019360	FBXO45	200933	NM_001105573	1	1	0	0	0	1	0	0	0	0	1	1	5
hsa-miR-3975	MIMAT0019360	TIGIT	201633	NM_173799	0	1	1	0	0	1	0	0	0	0	1	1	5
hsa-miR-3975	MIMAT0019360	DNAJC18	202052	XM_005271917	1	1	0	0	0	1	0	0	0	0	1	1	5
hsa-miR-3975	MIMAT0019360	TMEM184A	202915	NM_001097620	1	1	1	0	0	0	0	0	0	0	1	1	5
hsa-miR-3975	MIMAT0019360	ANKS6	203286	NM_173551	1	1	0	0	0	1	0	0	0	0	1	1	5
hsa-miR-3975	MIMAT0019360	CERS3	204219	NM_178842	1	1	0	0	0	1	0	0	0	0	1	1	5
hsa-miR-3975	MIMAT0019360	SLC36A1	206358	NM_078483	1	1	0	0	0	1	0	0	0	0	1	1	5
hsa-miR-3975	MIMAT0019360	AMER2	219287	XM_005266279	1	1	0	0	0	1	0	0	0	0	1	1	5
hsa-miR-3975	MIMAT0019360	ENKUR	219670	NM_145010	0	1	1	0	0	1	0	0	0	0	1	1	5
hsa-miR-3975	MIMAT0019360	LRTOMT	220074	NM_001145309	1	1	0	0	0	1	0	0	0	0	1	1	5
hsa-miR-3975	MIMAT0019360	FAM124A	220108	NM_145019	1	1	0	0	0	1	0	0	0	0	1	1	5
hsa-miR-3975	MIMAT0019360	DOK6	220164	NM_152721	1	1	0	0	0	1	0	0	0	0	1	1	5
hsa-miR-3975	MIMAT0019360	SEMA3D	223117	XM_005250229	0	1	1	0	0	1	0	0	0	0	1	1	5
hsa-miR-3975	MIMAT0019360	VGLL2	245806	NM_182645	1	1	0	0	0	1	0	0	0	0	1	1	5
hsa-miR-3975	MIMAT0019360	CNOT6L	246175	NM_144571	0	1	1	0	0	1	0	0	0	0	1	1	5
hsa-miR-3975	MIMAT0019360	PELI3	246330	NM_145065	1	1	0	0	0	1	0	0	0	0	1	1	5
hsa-miR-3975	MIMAT0019360	RICTOR	253260	XM_005248277	1	1	0	0	0	1	0	0	0	0	1	1	5
hsa-miR-3975	MIMAT0019360	EIF4E1B	253314	NM_001099408	1	1	0	0	0	1	0	0	0	0	1	1	5
hsa-miR-3975	MIMAT0019360	LCLAT1	253558	NM_182551	1	1	0	0	0	1	0	0	0	0	1	1	5
hsa-miR-3975	MIMAT0019360	METTL20	254013	XM_005253345	0	1	1	0	0	1	0	0	0	0	1	1	5
hsa-miR-3975	MIMAT0019360	CALHM1	255022	NM_001001412	1	1	0	0	0	1	0	0	0	0	1	1	5
hsa-miR-3975	MIMAT0019360	MYADML2	255275	NM_001145113	1	1	0	0	0	1	0	0	0	0	1	1	5
hsa-miR-3975	MIMAT0019360	C12orf79	256021	NM_001256373	1	1	0	0	0	1	0	0	0	0	1	1	5
hsa-miR-3975	MIMAT0019360	SCML4	256380	NM_198081	1	1	1	0	0	0	0	0	0	0	1	1	5
hsa-miR-3975	MIMAT0019360	WDR72	256764	NM_182758	1	1	0	0	0	1	0	0	0	0	1	1	5
hsa-miR-3975	MIMAT0019360	RNF214	257160	NM_207343	1	1	0	0	0	1	0	0	0	0	1	1	5
hsa-miR-3975	MIMAT0019360	GPX6	257202	NM_182701	0	1	1	0	0	1	0	0	0	0	1	1	5
hsa-miR-3975	MIMAT0019360	C2orf72	257407	NM_001144994	0	1	1	0	0	1	0	0	0	0	1	1	5
hsa-miR-3975	MIMAT0019360	ALS2CL	259173	NM_001190707	1	1	0	0	0	1	0	0	0	0	1	1	5
hsa-miR-3975	MIMAT0019360	OLFML1	283298	XM_005252878	0	1	1	0	0	1	0	0	0	0	1	1	5
hsa-miR-3975	MIMAT0019360	C16orf54	283897	NM_175900	0	1	1	0	0	1	0	0	0	0	1	1	5
hsa-miR-3975	MIMAT0019360	SLC13A5	284111	NM_177550	1	1	0	0	0	1	0	0	0	0	1	1	5
hsa-miR-3975	MIMAT0019360	CYB561D1	284613	NM_001134404	1	1	0	0	0	1	0	0	0	0	1	1	5
hsa-miR-3975	MIMAT0019360	ANKRD34A	284615	NM_001039888	1	1	0	0	0	1	0	0	0	0	1	1	5
hsa-miR-3975	MIMAT0019360	CCDC141	285025	NM_173648	1	1	0	0	0	1	0	0	0	0	1	1	5
hsa-miR-3975	MIMAT0019360	DNAJC5G	285126	NM_173650	1	1	0	0	0	1	0	0	0	0	1	1	5
hsa-miR-3975	MIMAT0019360	ZNF660	285349	XM_005265090	1	1	1	0	0	0	0	0	0	0	1	1	5
hsa-miR-3975	MIMAT0019360	ZFP41	286128	NM_173832	1	1	0	0	0	1	0	0	0	0	1	1	5
hsa-miR-3975	MIMAT0019360	FAM78A	286336	NM_033387	1	1	0	0	0	1	0	0	0	0	1	1	5
hsa-miR-3975	MIMAT0019360	TUSC5	286753	NM_172367	1	1	0	0	0	1	0	0	0	0	1	1	5
hsa-miR-3975	MIMAT0019360	RAB37	326624	XM_005257287	1	1	0	0	0	1	0	0	0	0	1	1	5
hsa-miR-3975	MIMAT0019360	TSPAN33	340348	NM_178562	1	1	1	0	0	0	0	0	0	0	1	1	5
hsa-miR-3975	MIMAT0019360	FREM2	341640	NM_207361	0	1	1	0	0	1	0	0	0	0	1	1	5
hsa-miR-3975	MIMAT0019360	ZKSCAN2	342357	XM_005255303	0	1	1	0	0	1	0	0	0	0	1	1	5
hsa-miR-3975	MIMAT0019360	CDKL4	344387	NM_001009565	0	1	1	0	0	1	0	0	0	0	1	1	5
hsa-miR-3975	MIMAT0019360	KIF24	347240	NM_194313	0	1	1	0	0	1	0	0	0	0	1	1	5
hsa-miR-3975	MIMAT0019360	ZNF81	347344	NM_007137	1	1	0	0	0	1	0	0	0	0	1	1	5
hsa-miR-3975	MIMAT0019360	OTOP3	347741	NM_001272005	1	1	0	0	0	1	0	0	0	0	1	1	5
hsa-miR-3975	MIMAT0019360	GEN1	348654	XM_005262612	1	1	0	0	0	1	0	0	0	0	1	1	5
hsa-miR-3975	MIMAT0019360	LCE1A	353131	NM_178348	1	1	0	0	0	1	0	0	0	0	1	1	5
hsa-miR-3975	MIMAT0019360	SLCO4C1	353189	NM_180991	1	1	0	0	0	1	0	0	0	0	1	1	5
hsa-miR-3975	MIMAT0019360	ZNF710	374655	XM_005254908	1	1	0	0	0	1	0	0	0	0	1	1	5
hsa-miR-3975	MIMAT0019360	MAST4	375449	NM_001164664	1	1	0	0	0	1	0	0	0	0	1	1	5
hsa-miR-3975	MIMAT0019360	AGRN	375790	XM_005244750	1	1	0	0	0	1	0	0	0	0	1	1	5
hsa-miR-3975	MIMAT0019360	C6orf120	387263	NM_001029863	1	1	0	0	0	1	0	0	0	0	1	1	5
hsa-miR-3975	MIMAT0019360	GPR153	387509	XM_005263456	1	1	0	0	0	1	0	0	0	0	1	1	5
hsa-miR-3975	MIMAT0019360	SLC22A25	387601	XM_005273985	1	1	0	0	0	1	0	0	0	0	1	1	5
hsa-miR-3975	MIMAT0019360	TMEM233	387890	XM_005253881	1	1	0	0	0	1	0	0	0	0	1	1	5
hsa-miR-3975	MIMAT0019360	SETD8	387893	NM_020382	1	1	0	0	0	1	0	0	0	0	1	1	5
hsa-miR-3975	MIMAT0019360	C15orf52	388115	XM_005254363	1	1	1	0	0	0	0	0	0	0	1	1	5
hsa-miR-3975	MIMAT0019360	SHISA6	388336	NM_207386	1	1	0	0	0	1	0	0	0	0	1	1	5
hsa-miR-3975	MIMAT0019360	SLC6A17	388662	NM_001010898	1	1	0	0	0	1	0	0	0	0	1	1	5
hsa-miR-3975	MIMAT0019360	NOTCH2NL	388677	NM_203458	1	1	1	0	0	0	0	0	0	0	1	1	5
hsa-miR-3975	MIMAT0019360	C2orf71	388939	NM_001029883	1	1	0	0	0	1	0	0	0	0	1	1	5
hsa-miR-3975	MIMAT0019360	FEZF1	389549	XM_005250337	1	1	0	0	0	1	0	0	0	0	1	1	5
hsa-miR-3975	MIMAT0019360	SLC25A35	399512	NM_201520	1	1	0	0	0	1	0	0	0	0	1	1	5
hsa-miR-3975	MIMAT0019360	SERTM1	400120	NM_203451	1	1	0	0	0	1	0	0	0	0	1	1	5
hsa-miR-3975	MIMAT0019360	C15orf54	400360	NM_207445	1	1	0	0	0	1	0	0	0	0	1	1	5
hsa-miR-3975	MIMAT0019360	C17orf102	400591	NM_207454	1	1	0	0	0	1	0	0	0	0	1	1	5
hsa-miR-3975	MIMAT0019360	TEX19	400629	XM_005256369	1	1	0	0	0	1	0	0	0	0	1	1	5
hsa-miR-3975	MIMAT0019360	NCMAP	400746	NM_001010980	1	1	0	0	0	1	0	0	0	0	1	1	5
hsa-miR-3975	MIMAT0019360	C2orf91	400950	NM_001242815	1	1	0	0	0	1	0	0	0	0	1	1	5
hsa-miR-3975	MIMAT0019360	EML6	400954	NM_001039753	0	1	1	0	0	1	0	0	0	0	1	1	5
hsa-miR-3975	MIMAT0019360	SNX30	401548	NM_001012994	1	1	0	0	0	1	0	0	0	0	1	1	5
hsa-miR-3975	MIMAT0019360	IFITM10	402778	NM_001170820	1	1	0	0	0	1	0	0	0	0	1	1	5
hsa-miR-3975	MIMAT0019360	MINOS1	440574	NM_001204083	0	1	1	0	0	1	0	0	0	0	1	1	5
hsa-miR-3975	MIMAT0019360	TMEM151B	441151	NM_001137560	1	1	0	0	0	1	0	0	0	0	1	1	5
hsa-miR-3975	MIMAT0019360	KPRP	448834	NM_001025231	1	1	0	0	0	1	0	0	0	0	1	1	5
hsa-miR-3975	MIMAT0019360	GPX8	493869	NM_001008397	1	1	1	0	0	0	0	0	0	0	1	1	5
hsa-miR-3975	MIMAT0019360	ZNF704	619279	XM_005251279	1	1	0	0	0	1	0	0	0	0	1	1	5
hsa-miR-3975	MIMAT0019360	ZNF862	643641	XM_005250036	0	1	1	0	0	1	0	0	0	0	1	1	5
hsa-miR-3975	MIMAT0019360	CBLN3	643866	NM_001039771	1	1	0	0	0	1	0	0	0	0	1	1	5
hsa-miR-3975	MIMAT0019360	C1orf233	643988	NM_001242659	1	1	0	0	0	1	0	0	0	0	1	1	5
hsa-miR-3975	MIMAT0019360	PPAN-P2RY11	692312	NM_001198690	1	1	0	0	0	1	0	0	0	0	1	1	5
hsa-miR-3975	MIMAT0019360	IRG1	730249	NM_001258406	1	1	0	0	0	1	0	0	0	0	1	1	5
hsa-miR-3975	MIMAT0019360	PSAPL1	768239	NM_001085382	1	1	0	0	0	1	0	0	0	0	1	1	5
hsa-miR-3975	MIMAT0019360	TVP23A	780776	XM_005255563	1	1	0	0	0	1	0	0	0	0	1	1	5
hsa-miR-3975	MIMAT0019360	POM121C	100101267	XM_005250082	1	1	0	0	0	1	0	0	0	0	1	1	5
hsa-miR-3975	MIMAT0019360	C17orf96	100170841	NM_001130677	1	1	0	0	0	1	0	0	0	0	1	1	5
hsa-miR-3975	MIMAT0019360	OCLN	100506658	NM_002538	0	1	1	0	0	1	0	0	0	0	1	1	5
hsa-miR-3975	MIMAT0019360	POC1B-GALNT4	100528030	NM_001199781	1	1	0	0	0	1	0	0	0	0	1	1	5
hsa-miR-3975	MIMAT0019360	CHURC1-FNTB	100529261	NM_001202559	1	1	1	0	0	0	0	0	0	0	1	1	5
hsa-miR-3975	MIMAT0019360	LOC100996485	100996485	NM_001277348	1	1	0	0	0	1	0	0	0	0	1	1	5
hsa-miR-3975	MIMAT0019360	ABL1	25	XM_005272177	1	0	1	0	0	1	0	0	0	0	1	1	5
hsa-miR-3975	MIMAT0019360	ABL1	25	NM_005157	1	0	1	0	0	1	0	0	0	0	1	1	5
hsa-miR-3975	MIMAT0019360	ABL1	25	NM_007313	1	0	1	0	0	1	0	0	0	0	1	1	5
hsa-miR-3975	MIMAT0019360	ACOX1	51	NM_001185039	1	0	1	0	0	1	0	0	0	0	1	1	5
hsa-miR-3975	MIMAT0019360	ACOX1	51	NM_004035	1	0	1	0	0	1	0	0	0	0	1	1	5
hsa-miR-3975	MIMAT0019360	ACOX1	51	NM_007292	1	0	1	0	0	1	0	0	0	0	1	1	5
hsa-miR-3975	MIMAT0019360	ADCY7	113	XM_005255783	1	0	1	0	0	1	0	0	0	0	1	1	5
hsa-miR-3975	MIMAT0019360	ADCY7	113	XM_005255785	1	0	1	0	0	1	0	0	0	0	1	1	5
hsa-miR-3975	MIMAT0019360	ADCY7	113	NM_001114	1	0	1	0	0	1	0	0	0	0	1	1	5
hsa-miR-3975	MIMAT0019360	ADCY7	113	XM_005255779	1	0	1	0	0	1	0	0	0	0	1	1	5
hsa-miR-3975	MIMAT0019360	ADCY7	113	XM_005255784	1	0	1	0	0	1	0	0	0	0	1	1	5
hsa-miR-3975	MIMAT0019360	ADCY7	113	XM_005255781	1	0	1	0	0	1	0	0	0	0	1	1	5
hsa-miR-3975	MIMAT0019360	ADCY7	113	XM_005255782	1	0	1	0	0	1	0	0	0	0	1	1	5
hsa-miR-3975	MIMAT0019360	ADCY7	113	XM_005255780	1	0	1	0	0	1	0	0	0	0	1	1	5
hsa-miR-3975	MIMAT0019360	AR	367	XM_005262264	1	0	1	0	0	1	0	0	0	0	1	1	5
hsa-miR-3975	MIMAT0019360	ARHGDIA	396	XM_005256365	1	0	1	0	0	1	0	0	0	0	1	1	5
hsa-miR-3975	MIMAT0019360	ARHGDIA	396	XM_005256366	1	0	1	0	0	1	0	0	0	0	1	1	5
hsa-miR-3975	MIMAT0019360	ARHGDIA	396	XM_005256367	1	0	1	0	0	1	0	0	0	0	1	1	5
hsa-miR-3975	MIMAT0019360	ARHGDIA	396	NM_001185078	1	0	1	0	0	1	0	0	0	0	1	1	5
hsa-miR-3975	MIMAT0019360	ARHGDIA	396	NM_004309	1	0	1	0	0	1	0	0	0	0	1	1	5
hsa-miR-3975	MIMAT0019360	ARNT	405	XM_005245160	1	0	1	0	0	1	0	0	0	0	1	1	5
hsa-miR-3975	MIMAT0019360	ARNT	405	XM_005245154	1	0	1	0	0	1	0	0	0	0	1	1	5
hsa-miR-3975	MIMAT0019360	ARNT	405	XM_005245157	1	0	1	0	0	1	0	0	0	0	1	1	5
hsa-miR-3975	MIMAT0019360	ARNT	405	XM_005245158	1	0	1	0	0	1	0	0	0	0	1	1	5
hsa-miR-3975	MIMAT0019360	ARNT	405	XM_005245159	1	0	1	0	0	1	0	0	0	0	1	1	5
hsa-miR-3975	MIMAT0019360	ARNT	405	XM_005245153	1	0	1	0	0	1	0	0	0	0	1	1	5
hsa-miR-3975	MIMAT0019360	ARNT	405	XM_005245152	1	0	1	0	0	1	0	0	0	0	1	1	5
hsa-miR-3975	MIMAT0019360	ARNT	405	XM_005245151	1	0	1	0	0	1	0	0	0	0	1	1	5
hsa-miR-3975	MIMAT0019360	ARNT	405	XM_005245156	1	0	1	0	0	1	0	0	0	0	1	1	5
hsa-miR-3975	MIMAT0019360	ARNT	405	XM_005245155	1	0	1	0	0	1	0	0	0	0	1	1	5
hsa-miR-3975	MIMAT0019360	ARSB	411	NM_000046	1	0	1	0	0	1	0	0	0	0	1	1	5
hsa-miR-3975	MIMAT0019360	ARSB	411	XM_005248505	1	0	1	0	0	1	0	0	0	0	1	1	5
hsa-miR-3975	MIMAT0019360	ATP6V0A1	535	NM_001130020	1	0	1	0	0	1	0	0	0	0	1	1	5
hsa-miR-3975	MIMAT0019360	ATP6V0A1	535	XM_005257462	1	0	1	0	0	1	0	0	0	0	1	1	5
hsa-miR-3975	MIMAT0019360	ATP6V0A1	535	XM_005257460	1	0	1	0	0	1	0	0	0	0	1	1	5
hsa-miR-3975	MIMAT0019360	ATP6V0A1	535	XM_005257463	1	0	1	0	0	1	0	0	0	0	1	1	5
hsa-miR-3975	MIMAT0019360	ATP6V0A1	535	XM_005257461	1	0	1	0	0	1	0	0	0	0	1	1	5
hsa-miR-3975	MIMAT0019360	ATP6V0A1	535	XM_005257459	1	0	1	0	0	1	0	0	0	0	1	1	5
hsa-miR-3975	MIMAT0019360	ATP6V0A1	535	NM_005177	1	0	1	0	0	1	0	0	0	0	1	1	5
hsa-miR-3975	MIMAT0019360	ATP6V0A1	535	NM_001130021	1	0	1	0	0	1	0	0	0	0	1	1	5
hsa-miR-3975	MIMAT0019360	ATP7B	540	NM_000053	1	0	1	0	0	1	0	0	0	0	1	1	5
hsa-miR-3975	MIMAT0019360	ATP7B	540	XM_005266433	1	0	1	0	0	1	0	0	0	0	1	1	5
hsa-miR-3975	MIMAT0019360	ATP7B	540	XM_005266432	1	0	1	0	0	1	0	0	0	0	1	1	5
hsa-miR-3975	MIMAT0019360	ATP7B	540	XM_005266429	1	0	1	0	0	1	0	0	0	0	1	1	5
hsa-miR-3975	MIMAT0019360	ATP7B	540	XM_005266434	1	0	1	0	0	1	0	0	0	0	1	1	5
hsa-miR-3975	MIMAT0019360	ATP7B	540	XM_005266427	1	0	1	0	0	1	0	0	0	0	1	1	5
hsa-miR-3975	MIMAT0019360	ATP7B	540	XM_005266426	1	0	1	0	0	1	0	0	0	0	1	1	5
hsa-miR-3975	MIMAT0019360	ATP7B	540	XM_005266425	1	0	1	0	0	1	0	0	0	0	1	1	5
hsa-miR-3975	MIMAT0019360	ATP7B	540	NM_001005918	1	0	1	0	0	1	0	0	0	0	1	1	5
hsa-miR-3975	MIMAT0019360	ATP7B	540	NM_001243182	1	0	1	0	0	1	0	0	0	0	1	1	5
hsa-miR-3975	MIMAT0019360	ATP7B	540	XM_005266424	1	0	1	0	0	1	0	0	0	0	1	1	5
hsa-miR-3975	MIMAT0019360	ATP7B	540	XM_005266423	1	0	1	0	0	1	0	0	0	0	1	1	5
hsa-miR-3975	MIMAT0019360	ATP7B	540	XM_005266431	1	0	1	0	0	1	0	0	0	0	1	1	5
hsa-miR-3975	MIMAT0019360	ATP7B	540	XM_005266428	1	0	1	0	0	1	0	0	0	0	1	1	5
hsa-miR-3975	MIMAT0019360	ATP7B	540	XM_005266430	1	0	1	0	0	1	0	0	0	0	1	1	5
hsa-miR-3975	MIMAT0019360	BCKDHB	594	NM_183050	1	0	1	0	0	1	0	0	0	0	1	1	5
hsa-miR-3975	MIMAT0019360	BCL2L1	598	NM_001191	1	0	1	0	0	1	0	0	0	0	1	1	5
hsa-miR-3975	MIMAT0019360	BCL2L1	598	XM_005260487	1	0	1	0	0	1	0	0	0	0	1	1	5
hsa-miR-3975	MIMAT0019360	BCL2L1	598	XM_005260486	1	0	1	0	0	1	0	0	0	0	1	1	5
hsa-miR-3975	MIMAT0019360	CEACAM1	634	NM_001184816	1	0	1	0	0	1	0	0	0	0	1	1	5
hsa-miR-3975	MIMAT0019360	CEACAM1	634	NM_001184813	1	0	1	0	0	1	0	0	0	0	1	1	5
hsa-miR-3975	MIMAT0019360	CEACAM1	634	NM_001184815	1	0	1	0	0	1	0	0	0	0	1	1	5
hsa-miR-3975	MIMAT0019360	CEACAM1	634	NM_001205344	1	0	1	0	0	1	0	0	0	0	1	1	5
hsa-miR-3975	MIMAT0019360	CEACAM1	634	NM_001024912	1	0	1	0	0	1	0	0	0	0	1	1	5
hsa-miR-3975	MIMAT0019360	DAGLA	747	NM_006133	1	0	1	0	0	1	0	0	0	0	1	1	5
hsa-miR-3975	MIMAT0019360	DAGLA	747	XM_005274230	1	0	1	0	0	1	0	0	0	0	1	1	5
hsa-miR-3975	MIMAT0019360	LDLRAD4	753	NM_001276249	1	0	1	0	0	1	0	0	0	0	1	1	5
hsa-miR-3975	MIMAT0019360	LDLRAD4	753	NM_181481	1	0	1	0	0	1	0	0	0	0	1	1	5
hsa-miR-3975	MIMAT0019360	LDLRAD4	753	NM_001276251	1	0	1	0	0	1	0	0	0	0	1	1	5
hsa-miR-3975	MIMAT0019360	LDLRAD4	753	NM_181482	1	0	1	0	0	1	0	0	0	0	1	1	5
hsa-miR-3975	MIMAT0019360	LDLRAD4	753	XM_005258140	1	0	1	0	0	1	0	0	0	0	1	1	5
hsa-miR-3975	MIMAT0019360	LDLRAD4	753	NM_001003675	1	0	1	0	0	1	0	0	0	0	1	1	5
hsa-miR-3975	MIMAT0019360	CACNA1E	777	NM_001205294	1	0	1	0	0	1	0	0	0	0	1	1	5
hsa-miR-3975	MIMAT0019360	CACNA1E	777	NM_000721	1	0	1	0	0	1	0	0	0	0	1	1	5
hsa-miR-3975	MIMAT0019360	CACNA1E	777	NM_001205293	1	0	1	0	0	1	0	0	0	0	1	1	5
hsa-miR-3975	MIMAT0019360	CALM1	801	XM_005268091	1	0	1	0	0	1	0	0	0	0	1	1	5
hsa-miR-3975	MIMAT0019360	CALM1	801	NM_006888	1	0	1	0	0	1	0	0	0	0	1	1	5
hsa-miR-3975	MIMAT0019360	CALM1	801	XM_005268090	1	0	1	0	0	1	0	0	0	0	1	1	5
hsa-miR-3975	MIMAT0019360	CASP10	843	NM_032977	1	0	1	0	0	1	0	0	0	0	1	1	5
hsa-miR-3975	MIMAT0019360	CASP10	843	NM_001206524	1	0	1	0	0	1	0	0	0	0	1	1	5
hsa-miR-3975	MIMAT0019360	CASP10	843	NM_001230	1	0	1	0	0	1	0	0	0	0	1	1	5
hsa-miR-3975	MIMAT0019360	CASP10	843	NM_032976	1	0	1	0	0	1	0	0	0	0	1	1	5
hsa-miR-3975	MIMAT0019360	CBL	867	NM_005188	1	0	1	0	0	1	0	0	0	0	1	1	5
hsa-miR-3975	MIMAT0019360	CBL	867	XM_005271718	1	0	1	0	0	1	0	0	0	0	1	1	5
hsa-miR-3975	MIMAT0019360	CD28	940	NM_006139	1	0	1	0	0	1	0	0	0	0	1	1	5
hsa-miR-3975	MIMAT0019360	CD28	940	NM_001243078	1	0	1	0	0	1	0	0	0	0	1	1	5
hsa-miR-3975	MIMAT0019360	CD28	940	NM_001243077	1	0	1	0	0	1	0	0	0	0	1	1	5
hsa-miR-3975	MIMAT0019360	ENTPD1	953	NM_001164181	1	0	1	0	0	1	0	0	0	0	1	1	5
hsa-miR-3975	MIMAT0019360	ENTPD1	953	NM_001164183	1	0	1	0	0	1	0	0	0	0	1	1	5
hsa-miR-3975	MIMAT0019360	ENTPD1	953	NM_001164178	1	0	1	0	0	1	0	0	0	0	1	1	5
hsa-miR-3975	MIMAT0019360	ENTPD1	953	NM_001164182	1	0	1	0	0	1	0	0	0	0	1	1	5
hsa-miR-3975	MIMAT0019360	ENTPD1	953	XM_005270285	1	0	1	0	0	1	0	0	0	0	1	1	5
hsa-miR-3975	MIMAT0019360	ENTPD1	953	NM_001098175	1	0	1	0	0	1	0	0	0	0	1	1	5
hsa-miR-3975	MIMAT0019360	ENTPD1	953	NM_001164179	1	0	1	0	0	1	0	0	0	0	1	1	5
hsa-miR-3975	MIMAT0019360	CDH6	1004	NM_004932	1	0	1	0	0	1	0	0	0	0	1	1	5
hsa-miR-3975	MIMAT0019360	CENPA	1058	NM_001809	1	0	1	0	0	1	0	0	0	0	1	1	5
hsa-miR-3975	MIMAT0019360	CENPA	1058	NM_001042426	1	0	1	0	0	1	0	0	0	0	1	1	5
hsa-miR-3975	MIMAT0019360	CHRM2	1129	XM_005250130	1	0	1	0	0	1	0	0	0	0	1	1	5
hsa-miR-3975	MIMAT0019360	CHRNA3	1136	NM_000743	1	0	1	0	0	1	0	0	0	0	1	1	5
hsa-miR-3975	MIMAT0019360	CLTA	1211	XM_005251361	1	0	1	0	0	1	0	0	0	0	1	1	5
hsa-miR-3975	MIMAT0019360	CLTA	1211	XM_005251360	1	0	1	0	0	1	0	0	0	0	1	1	5
hsa-miR-3975	MIMAT0019360	CPE	1363	NM_001873	0	0	1	0	1	1	0	0	0	0	1	1	5
hsa-miR-3975	MIMAT0019360	CPM	1368	NM_001005502	1	0	1	0	0	1	0	0	0	0	1	1	5
hsa-miR-3975	MIMAT0019360	CPM	1368	NM_198320	1	0	1	0	0	1	0	0	0	0	1	1	5
hsa-miR-3975	MIMAT0019360	CTGF	1490	XM_005266827	1	0	1	0	0	1	0	0	0	0	1	1	5
hsa-miR-3975	MIMAT0019360	CXADR	1525	NM_001207065	1	0	1	0	0	1	0	0	0	0	1	1	5
hsa-miR-3975	MIMAT0019360	CXADR	1525	NM_001207064	1	0	1	0	0	1	0	0	0	0	1	1	5
hsa-miR-3975	MIMAT0019360	CXADR	1525	NM_001207063	1	0	1	0	0	1	0	0	0	0	1	1	5
hsa-miR-3975	MIMAT0019360	CXADR	1525	XM_005260928	1	0	1	0	0	1	0	0	0	0	1	1	5
hsa-miR-3975	MIMAT0019360	DIO1	1733	NM_000792	1	0	1	0	0	1	0	0	0	0	1	1	5
hsa-miR-3975	MIMAT0019360	DIO1	1733	NM_001039716	1	0	1	0	0	1	0	0	0	0	1	1	5
hsa-miR-3975	MIMAT0019360	DIO1	1733	NM_213593	1	0	1	0	0	1	0	0	0	0	1	1	5
hsa-miR-3975	MIMAT0019360	DIO1	1733	XM_005270556	1	0	1	0	0	1	0	0	0	0	1	1	5
hsa-miR-3975	MIMAT0019360	DIO1	1733	NM_001039715	1	0	1	0	0	1	0	0	0	0	1	1	5
hsa-miR-3975	MIMAT0019360	DIO1	1733	XM_005270554	1	0	1	0	0	1	0	0	0	0	1	1	5
hsa-miR-3975	MIMAT0019360	DIO1	1733	XM_005270555	1	0	1	0	0	1	0	0	0	0	1	1	5
hsa-miR-3975	MIMAT0019360	DRP2	1821	NM_001171184	1	0	1	0	0	1	0	0	0	0	1	1	5
hsa-miR-3975	MIMAT0019360	DSG2	1829	NM_001943	1	0	1	0	0	1	0	0	0	0	1	1	5
hsa-miR-3975	MIMAT0019360	SLC26A2	1836	NM_000112	1	0	1	0	0	1	0	0	0	0	1	1	5
hsa-miR-3975	MIMAT0019360	E2F6	1876	NM_212540	1	0	1	0	0	1	0	0	0	0	1	1	5
hsa-miR-3975	MIMAT0019360	E2F6	1876	NM_001278278	1	0	1	0	0	1	0	0	0	0	1	1	5
hsa-miR-3975	MIMAT0019360	E2F6	1876	NM_198256	1	0	1	0	0	1	0	0	0	0	1	1	5
hsa-miR-3975	MIMAT0019360	E2F6	1876	NM_001278275	1	0	1	0	0	1	0	0	0	0	1	1	5
hsa-miR-3975	MIMAT0019360	E2F6	1876	XM_005246154	1	0	1	0	0	1	0	0	0	0	1	1	5
hsa-miR-3975	MIMAT0019360	E2F6	1876	NM_001278276	1	0	1	0	0	1	0	0	0	0	1	1	5
hsa-miR-3975	MIMAT0019360	E2F6	1876	XM_005246155	1	0	1	0	0	1	0	0	0	0	1	1	5
hsa-miR-3975	MIMAT0019360	EGFR	1956	XM_005271746	1	0	1	0	0	1	0	0	0	0	1	1	5
hsa-miR-3975	MIMAT0019360	EGFR	1956	XM_005271747	1	0	1	0	0	1	0	0	0	0	1	1	5
hsa-miR-3975	MIMAT0019360	EIF4B	1975	XM_005268709	1	0	1	0	0	1	0	0	0	0	1	1	5
hsa-miR-3975	MIMAT0019360	EIF4B	1975	XM_005268710	1	0	1	0	0	1	0	0	0	0	1	1	5
hsa-miR-3975	MIMAT0019360	ELK4	2005	NM_001973	1	0	1	0	0	1	0	0	0	0	1	1	5
hsa-miR-3975	MIMAT0019360	EPS8	2059	NM_004447	1	0	1	0	0	1	0	0	0	0	1	1	5
hsa-miR-3975	MIMAT0019360	EPS8	2059	XM_005253341	1	0	1	0	0	1	0	0	0	0	1	1	5
hsa-miR-3975	MIMAT0019360	EPS8	2059	XM_005253339	1	0	1	0	0	1	0	0	0	0	1	1	5
hsa-miR-3975	MIMAT0019360	EPS8	2059	XM_005253340	1	0	1	0	0	1	0	0	0	0	1	1	5
hsa-miR-3975	MIMAT0019360	EPS15	2060	XM_005270620	1	0	1	0	0	1	0	0	0	0	1	1	5
hsa-miR-3975	MIMAT0019360	EPS15	2060	XM_005270619	1	0	1	0	0	1	0	0	0	0	1	1	5
hsa-miR-3975	MIMAT0019360	EPS15	2060	XM_005270618	1	0	1	0	0	1	0	0	0	0	1	1	5
hsa-miR-3975	MIMAT0019360	ERCC6	2074	NM_000124	1	0	1	0	0	1	0	0	0	0	1	1	5
hsa-miR-3975	MIMAT0019360	ERCC6	2074	XM_005269596	1	0	1	0	0	1	0	0	0	0	1	1	5
hsa-miR-3975	MIMAT0019360	ERCC6	2074	XM_005269595	1	0	1	0	0	1	0	0	0	0	1	1	5
hsa-miR-3975	MIMAT0019360	ETF1	2107	NM_004730	0	0	1	0	0	1	0	1	0	0	1	1	5
hsa-miR-3975	MIMAT0019360	FKTN	2218	XM_005251805	1	0	1	0	0	1	0	0	0	0	1	1	5
hsa-miR-3975	MIMAT0019360	FKTN	2218	XM_005251804	1	0	1	0	0	1	0	0	0	0	1	1	5
hsa-miR-3975	MIMAT0019360	FKTN	2218	NM_006731	1	0	1	0	0	1	0	0	0	0	1	1	5
hsa-miR-3975	MIMAT0019360	FKTN	2218	XM_005251803	1	0	1	0	0	1	0	0	0	0	1	1	5
hsa-miR-3975	MIMAT0019360	FKTN	2218	XM_005251806	1	0	1	0	0	1	0	0	0	0	1	1	5
hsa-miR-3975	MIMAT0019360	FGF11	2256	NM_004112	1	0	1	0	0	1	0	0	0	0	1	1	5
hsa-miR-3975	MIMAT0019360	FGF11	2256	XM_005256528	1	0	1	0	0	1	0	0	0	0	1	1	5
hsa-miR-3975	MIMAT0019360	FGF11	2256	XM_005256527	1	0	1	0	0	1	0	0	0	0	1	1	5
hsa-miR-3975	MIMAT0019360	FKBP5	2289	NM_001145777	1	0	1	0	0	1	0	0	0	0	1	1	5
hsa-miR-3975	MIMAT0019360	FOXO3	2309	XM_005266867	1	0	1	0	0	1	0	0	0	0	1	1	5
hsa-miR-3975	MIMAT0019360	FOXO3	2309	XM_005266868	1	0	1	0	0	1	0	0	0	0	1	1	5
hsa-miR-3975	MIMAT0019360	FOXO3	2309	NM_201559	1	0	1	0	0	1	0	0	0	0	1	1	5
hsa-miR-3975	MIMAT0019360	FLII	2314	XM_005256559	1	0	1	0	0	1	0	0	0	0	1	1	5
hsa-miR-3975	MIMAT0019360	FLII	2314	XM_005256558	1	0	1	0	0	1	0	0	0	0	1	1	5
hsa-miR-3975	MIMAT0019360	FLII	2314	NM_001256264	1	0	1	0	0	1	0	0	0	0	1	1	5
hsa-miR-3975	MIMAT0019360	FLII	2314	XM_005256556	1	0	1	0	0	1	0	0	0	0	1	1	5
hsa-miR-3975	MIMAT0019360	FLII	2314	XM_005256555	1	0	1	0	0	1	0	0	0	0	1	1	5
hsa-miR-3975	MIMAT0019360	FLII	2314	NM_001256265	1	0	1	0	0	1	0	0	0	0	1	1	5
hsa-miR-3975	MIMAT0019360	FLII	2314	XM_005256557	1	0	1	0	0	1	0	0	0	0	1	1	5
hsa-miR-3975	MIMAT0019360	FLT1	2321	NM_002019	1	0	1	0	0	1	0	0	0	0	1	1	5
hsa-miR-3975	MIMAT0019360	FMO2	2327	NM_001460	1	0	1	0	0	1	0	0	0	0	1	1	5
hsa-miR-3975	MIMAT0019360	FNTB	2342	NM_002028	1	0	1	0	0	1	0	0	0	0	1	1	5
hsa-miR-3975	MIMAT0019360	FUT2	2524	NM_000511	1	0	1	0	0	1	0	0	0	0	1	1	5
hsa-miR-3975	MIMAT0019360	FUT2	2524	NM_001097638	1	0	1	0	0	1	0	0	0	0	1	1	5
hsa-miR-3975	MIMAT0019360	IFI6	2537	NM_022873	1	0	1	0	0	1	0	0	0	0	1	1	5
hsa-miR-3975	MIMAT0019360	IFI6	2537	NM_002038	1	0	1	0	0	1	0	0	0	0	1	1	5
hsa-miR-3975	MIMAT0019360	IFI6	2537	NM_022872	1	0	1	0	0	1	0	0	0	0	1	1	5
hsa-miR-3975	MIMAT0019360	GABRA4	2557	NM_001204267	1	0	1	0	0	1	0	0	0	0	1	1	5
hsa-miR-3975	MIMAT0019360	GABRA4	2557	NM_001204266	1	0	1	0	0	1	0	0	0	0	1	1	5
hsa-miR-3975	MIMAT0019360	GABRE	2564	XM_005274662	1	0	1	0	0	1	0	0	0	0	1	1	5
hsa-miR-3975	MIMAT0019360	GJB2	2706	NM_004004	1	0	1	0	0	1	0	0	0	0	1	1	5
hsa-miR-3975	MIMAT0019360	GJB2	2706	XM_005266355	1	0	1	0	0	1	0	0	0	0	1	1	5
hsa-miR-3975	MIMAT0019360	GJB2	2706	XM_005266356	1	0	1	0	0	1	0	0	0	0	1	1	5
hsa-miR-3975	MIMAT0019360	GJB2	2706	XM_005266354	1	0	1	0	0	1	0	0	0	0	1	1	5
hsa-miR-3975	MIMAT0019360	GJB3	2707	NM_024009	1	0	1	0	0	1	0	0	0	0	1	1	5
hsa-miR-3975	MIMAT0019360	GJB3	2707	NM_001005752	1	0	1	0	0	1	0	0	0	0	1	1	5
hsa-miR-3975	MIMAT0019360	GRIK3	2899	NM_000831	1	0	1	0	0	1	0	0	0	0	1	1	5
hsa-miR-3975	MIMAT0019360	GRIN2C	2905	NM_000835	1	0	1	0	0	1	0	0	0	0	1	1	5
hsa-miR-3975	MIMAT0019360	GRM6	2916	NM_000843	1	0	1	0	0	1	0	0	0	0	1	1	5
hsa-miR-3975	MIMAT0019360	GUCY1A3	2982	NM_001130687	1	0	1	0	0	1	0	0	0	0	1	1	5
hsa-miR-3975	MIMAT0019360	HMGN1	3150	NM_004965	0	0	1	0	1	1	0	0	0	0	1	1	5
hsa-miR-3975	MIMAT0019360	HOXD8	3234	NM_019558	1	0	1	0	0	1	0	0	0	0	1	1	5
hsa-miR-3975	MIMAT0019360	HOXD8	3234	NM_001199747	1	0	1	0	0	1	0	0	0	0	1	1	5
hsa-miR-3975	MIMAT0019360	HOXD8	3234	NM_001199746	1	0	1	0	0	1	0	0	0	0	1	1	5
hsa-miR-3975	MIMAT0019360	INSR	3643	XM_005259554	1	0	1	0	0	1	0	0	0	0	1	1	5
hsa-miR-3975	MIMAT0019360	INSR	3643	XM_005259553	1	0	1	0	0	1	0	0	0	0	1	1	5
hsa-miR-3975	MIMAT0019360	INSR	3643	XM_005259552	1	0	1	0	0	1	0	0	0	0	1	1	5
hsa-miR-3975	MIMAT0019360	ITPA	3704	NM_033453	1	0	1	0	0	1	0	0	0	0	1	1	5
hsa-miR-3975	MIMAT0019360	ITPA	3704	NM_181493	1	0	1	0	0	1	0	0	0	0	1	1	5
hsa-miR-3975	MIMAT0019360	ITPA	3704	NM_001267623	1	0	1	0	0	1	0	0	0	0	1	1	5
hsa-miR-3975	MIMAT0019360	KCNA7	3743	NM_031886	1	0	1	0	0	1	0	0	0	0	1	1	5
hsa-miR-3975	MIMAT0019360	KCNJ2	3759	NM_000891	0	0	1	0	0	1	0	1	0	0	1	1	5
hsa-miR-3975	MIMAT0019360	KCNJ11	3767	NM_001166290	1	0	1	0	0	1	0	0	0	0	1	1	5
hsa-miR-3975	MIMAT0019360	KCNJ11	3767	NM_000525	1	0	1	0	0	1	0	0	0	0	1	1	5
hsa-miR-3975	MIMAT0019360	KCNMA1	3778	XM_005269773	1	0	1	0	0	1	0	0	0	0	1	1	5
hsa-miR-3975	MIMAT0019360	KCNMA1	3778	NM_001271518	1	0	1	0	0	1	0	0	0	0	1	1	5
hsa-miR-3975	MIMAT0019360	KCNMA1	3778	XM_005269798	1	0	1	0	0	1	0	0	0	0	1	1	5
hsa-miR-3975	MIMAT0019360	KCNMA1	3778	XM_005269797	1	0	1	0	0	1	0	0	0	0	1	1	5
hsa-miR-3975	MIMAT0019360	KCNMA1	3778	XM_005269790	1	0	1	0	0	1	0	0	0	0	1	1	5
hsa-miR-3975	MIMAT0019360	KCNMA1	3778	XM_005269796	1	0	1	0	0	1	0	0	0	0	1	1	5
hsa-miR-3975	MIMAT0019360	KCNMA1	3778	XM_005269795	1	0	1	0	0	1	0	0	0	0	1	1	5
hsa-miR-3975	MIMAT0019360	KCNMA1	3778	NM_001014797	1	0	1	0	0	1	0	0	0	0	1	1	5
hsa-miR-3975	MIMAT0019360	KCNMA1	3778	XM_005269787	1	0	1	0	0	1	0	0	0	0	1	1	5
hsa-miR-3975	MIMAT0019360	KCNMA1	3778	XM_005269786	1	0	1	0	0	1	0	0	0	0	1	1	5
hsa-miR-3975	MIMAT0019360	KCNMA1	3778	XM_005269784	1	0	1	0	0	1	0	0	0	0	1	1	5
hsa-miR-3975	MIMAT0019360	KCNMA1	3778	XM_005269785	1	0	1	0	0	1	0	0	0	0	1	1	5
hsa-miR-3975	MIMAT0019360	KCNMA1	3778	XM_005269791	1	0	1	0	0	1	0	0	0	0	1	1	5
hsa-miR-3975	MIMAT0019360	KCNMA1	3778	XM_005269783	1	0	1	0	0	1	0	0	0	0	1	1	5
hsa-miR-3975	MIMAT0019360	KCNMA1	3778	XM_005269792	1	0	1	0	0	1	0	0	0	0	1	1	5
hsa-miR-3975	MIMAT0019360	KCNMA1	3778	XM_005269793	1	0	1	0	0	1	0	0	0	0	1	1	5
hsa-miR-3975	MIMAT0019360	KCNMA1	3778	XM_005269789	1	0	1	0	0	1	0	0	0	0	1	1	5
hsa-miR-3975	MIMAT0019360	KCNMA1	3778	XM_005269776	1	0	1	0	0	1	0	0	0	0	1	1	5
hsa-miR-3975	MIMAT0019360	KCNMA1	3778	XM_005269775	1	0	1	0	0	1	0	0	0	0	1	1	5
hsa-miR-3975	MIMAT0019360	KCNMA1	3778	XM_005269774	1	0	1	0	0	1	0	0	0	0	1	1	5
hsa-miR-3975	MIMAT0019360	KCNMA1	3778	XM_005269782	1	0	1	0	0	1	0	0	0	0	1	1	5
hsa-miR-3975	MIMAT0019360	KCNMA1	3778	XM_005269781	1	0	1	0	0	1	0	0	0	0	1	1	5
hsa-miR-3975	MIMAT0019360	KCNMA1	3778	XM_005269778	1	0	1	0	0	1	0	0	0	0	1	1	5
hsa-miR-3975	MIMAT0019360	KCNMA1	3778	XM_005269777	1	0	1	0	0	1	0	0	0	0	1	1	5
hsa-miR-3975	MIMAT0019360	KCNMA1	3778	XM_005269780	1	0	1	0	0	1	0	0	0	0	1	1	5
hsa-miR-3975	MIMAT0019360	KIF3C	3797	XM_005264300	1	0	1	0	0	1	0	0	0	0	1	1	5
hsa-miR-3975	MIMAT0019360	KIF3C	3797	XM_005264299	1	0	1	0	0	1	0	0	0	0	1	1	5
hsa-miR-3975	MIMAT0019360	LCP1	3936	XM_005266374	1	0	1	0	0	1	0	0	0	0	1	1	5
hsa-miR-3975	MIMAT0019360	LCP1	3936	XM_005266373	1	0	1	0	0	1	0	0	0	0	1	1	5
hsa-miR-3975	MIMAT0019360	ABLIM1	3983	XM_005269830	1	0	1	0	0	1	0	0	0	0	1	1	5
hsa-miR-3975	MIMAT0019360	ABLIM1	3983	XM_005269829	1	0	1	0	0	1	0	0	0	0	1	1	5
hsa-miR-3975	MIMAT0019360	ABLIM1	3983	XM_005269828	1	0	1	0	0	1	0	0	0	0	1	1	5
hsa-miR-3975	MIMAT0019360	ABLIM1	3983	NM_006720	1	0	1	0	0	1	0	0	0	0	1	1	5
hsa-miR-3975	MIMAT0019360	ABLIM1	3983	XM_005269827	1	0	1	0	0	1	0	0	0	0	1	1	5
hsa-miR-3975	MIMAT0019360	ABLIM1	3983	XM_005269826	1	0	1	0	0	1	0	0	0	0	1	1	5
hsa-miR-3975	MIMAT0019360	ABLIM1	3983	XM_005269825	1	0	1	0	0	1	0	0	0	0	1	1	5
hsa-miR-3975	MIMAT0019360	ABLIM1	3983	XM_005269823	1	0	1	0	0	1	0	0	0	0	1	1	5
hsa-miR-3975	MIMAT0019360	ABLIM1	3983	XM_005269822	1	0	1	0	0	1	0	0	0	0	1	1	5
hsa-miR-3975	MIMAT0019360	ABLIM1	3983	XM_005269821	1	0	1	0	0	1	0	0	0	0	1	1	5
hsa-miR-3975	MIMAT0019360	ABLIM1	3983	XM_005269820	1	0	1	0	0	1	0	0	0	0	1	1	5
hsa-miR-3975	MIMAT0019360	ABLIM1	3983	XM_005269819	1	0	1	0	0	1	0	0	0	0	1	1	5
hsa-miR-3975	MIMAT0019360	ABLIM1	3983	NM_002313	1	0	1	0	0	1	0	0	0	0	1	1	5
hsa-miR-3975	MIMAT0019360	ABLIM1	3983	NM_001003407	1	0	1	0	0	1	0	0	0	0	1	1	5
hsa-miR-3975	MIMAT0019360	ABLIM1	3983	NM_001003408	1	0	1	0	0	1	0	0	0	0	1	1	5
hsa-miR-3975	MIMAT0019360	ABLIM1	3983	XM_005269824	1	0	1	0	0	1	0	0	0	0	1	1	5
hsa-miR-3975	MIMAT0019360	LSS	4047	NM_001145437	1	0	1	0	0	1	0	0	0	0	1	1	5
hsa-miR-3975	MIMAT0019360	LSS	4047	NM_001145436	1	0	1	0	0	1	0	0	0	0	1	1	5
hsa-miR-3975	MIMAT0019360	LSS	4047	NM_002340	1	0	1	0	0	1	0	0	0	0	1	1	5
hsa-miR-3975	MIMAT0019360	SMAD3	4088	XM_005254383	1	0	1	0	0	1	0	0	0	0	1	1	5
hsa-miR-3975	MIMAT0019360	SMAD3	4088	NM_001145104	1	0	1	0	0	1	0	0	0	0	1	1	5
hsa-miR-3975	MIMAT0019360	SMAD3	4088	NM_001145103	1	0	1	0	0	1	0	0	0	0	1	1	5
hsa-miR-3975	MIMAT0019360	SMAD3	4088	NM_001145102	1	0	1	0	0	1	0	0	0	0	1	1	5
hsa-miR-3975	MIMAT0019360	SMAD3	4088	NM_005902	1	0	1	0	0	1	0	0	0	0	1	1	5
hsa-miR-3975	MIMAT0019360	MAOB	4129	NM_000898	1	0	1	0	0	1	0	0	0	0	1	1	5
hsa-miR-3975	MIMAT0019360	MAOB	4129	XM_005272609	1	0	1	0	0	1	0	0	0	0	1	1	5
hsa-miR-3975	MIMAT0019360	MAOB	4129	XM_005272606	1	0	1	0	0	1	0	0	0	0	1	1	5
hsa-miR-3975	MIMAT0019360	MAOB	4129	XM_005272608	1	0	1	0	0	1	0	0	0	0	1	1	5
hsa-miR-3975	MIMAT0019360	MAOB	4129	XM_005272607	1	0	1	0	0	1	0	0	0	0	1	1	5
hsa-miR-3975	MIMAT0019360	MBD1	4152	NM_001204143	1	0	1	0	0	1	0	0	0	0	1	1	5
hsa-miR-3975	MIMAT0019360	MBD1	4152	XM_005258269	1	0	1	0	0	1	0	0	0	0	1	1	5
hsa-miR-3975	MIMAT0019360	MBD1	4152	XM_005258262	1	0	1	0	0	1	0	0	0	0	1	1	5
hsa-miR-3975	MIMAT0019360	MBD1	4152	NM_002384	1	0	1	0	0	1	0	0	0	0	1	1	5
hsa-miR-3975	MIMAT0019360	MBD1	4152	XM_005258261	1	0	1	0	0	1	0	0	0	0	1	1	5
hsa-miR-3975	MIMAT0019360	MBD1	4152	XM_005258263	1	0	1	0	0	1	0	0	0	0	1	1	5
hsa-miR-3975	MIMAT0019360	MBD1	4152	NM_015845	1	0	1	0	0	1	0	0	0	0	1	1	5
hsa-miR-3975	MIMAT0019360	MBD1	4152	NM_015844	1	0	1	0	0	1	0	0	0	0	1	1	5
hsa-miR-3975	MIMAT0019360	MBD1	4152	NM_015847	1	0	1	0	0	1	0	0	0	0	1	1	5
hsa-miR-3975	MIMAT0019360	MBD1	4152	NM_001204136	1	0	1	0	0	1	0	0	0	0	1	1	5
hsa-miR-3975	MIMAT0019360	MBD1	4152	NM_001204142	1	0	1	0	0	1	0	0	0	0	1	1	5
hsa-miR-3975	MIMAT0019360	MBNL1	4154	XM_005247470	1	0	1	0	0	1	0	0	0	0	1	1	5
hsa-miR-3975	MIMAT0019360	MBNL1	4154	XM_005247475	1	0	1	0	0	1	0	0	0	0	1	1	5
hsa-miR-3975	MIMAT0019360	MBNL1	4154	XM_005247476	1	0	1	0	0	1	0	0	0	0	1	1	5
hsa-miR-3975	MIMAT0019360	MBNL1	4154	XM_005247477	1	0	1	0	0	1	0	0	0	0	1	1	5
hsa-miR-3975	MIMAT0019360	MBNL1	4154	XM_005247474	1	0	1	0	0	1	0	0	0	0	1	1	5
hsa-miR-3975	MIMAT0019360	MBNL1	4154	XM_005247469	1	0	1	0	0	1	0	0	0	0	1	1	5
hsa-miR-3975	MIMAT0019360	MBNL1	4154	XM_005247473	1	0	1	0	0	1	0	0	0	0	1	1	5
hsa-miR-3975	MIMAT0019360	MBNL1	4154	NM_207294	1	0	1	0	0	1	0	0	0	0	1	1	5
hsa-miR-3975	MIMAT0019360	MBNL1	4154	NM_207295	1	0	1	0	0	1	0	0	0	0	1	1	5
hsa-miR-3975	MIMAT0019360	MBNL1	4154	XM_005247472	1	0	1	0	0	1	0	0	0	0	1	1	5
hsa-miR-3975	MIMAT0019360	MBNL1	4154	NM_207296	1	0	1	0	0	1	0	0	0	0	1	1	5
hsa-miR-3975	MIMAT0019360	MBNL1	4154	NM_207297	1	0	1	0	0	1	0	0	0	0	1	1	5
hsa-miR-3975	MIMAT0019360	MBNL1	4154	NM_207293	1	0	1	0	0	1	0	0	0	0	1	1	5
hsa-miR-3975	MIMAT0019360	MBNL1	4154	XM_005247471	1	0	1	0	0	1	0	0	0	0	1	1	5
hsa-miR-3975	MIMAT0019360	MBNL1	4154	XM_005247468	1	0	1	0	0	1	0	0	0	0	1	1	5
hsa-miR-3975	MIMAT0019360	MBNL1	4154	XM_005247460	1	0	1	0	0	1	0	0	0	0	1	1	5
hsa-miR-3975	MIMAT0019360	MBNL1	4154	XM_005247467	1	0	1	0	0	1	0	0	0	0	1	1	5
hsa-miR-3975	MIMAT0019360	MBNL1	4154	XM_005247466	1	0	1	0	0	1	0	0	0	0	1	1	5
hsa-miR-3975	MIMAT0019360	MBNL1	4154	XM_005247459	1	0	1	0	0	1	0	0	0	0	1	1	5
hsa-miR-3975	MIMAT0019360	MBNL1	4154	XM_005247465	1	0	1	0	0	1	0	0	0	0	1	1	5
hsa-miR-3975	MIMAT0019360	MBNL1	4154	XM_005247464	1	0	1	0	0	1	0	0	0	0	1	1	5
hsa-miR-3975	MIMAT0019360	MBNL1	4154	XM_005247463	1	0	1	0	0	1	0	0	0	0	1	1	5
hsa-miR-3975	MIMAT0019360	MBNL1	4154	XM_005247462	1	0	1	0	0	1	0	0	0	0	1	1	5
hsa-miR-3975	MIMAT0019360	MBNL1	4154	XM_005247461	1	0	1	0	0	1	0	0	0	0	1	1	5
hsa-miR-3975	MIMAT0019360	MBNL1	4154	XM_005247457	1	0	1	0	0	1	0	0	0	0	1	1	5
hsa-miR-3975	MIMAT0019360	MBNL1	4154	XM_005247458	1	0	1	0	0	1	0	0	0	0	1	1	5
hsa-miR-3975	MIMAT0019360	MBNL1	4154	NM_207292	1	0	1	0	0	1	0	0	0	0	1	1	5
hsa-miR-3975	MIMAT0019360	MBP	4155	NM_001025092	0	0	1	0	1	1	0	0	0	0	1	1	5
hsa-miR-3975	MIMAT0019360	MBP	4155	NM_001025090	0	0	1	0	1	1	0	0	0	0	1	1	5
hsa-miR-3975	MIMAT0019360	MBP	4155	NM_002385	0	0	1	0	1	1	0	0	0	0	1	1	5
hsa-miR-3975	MIMAT0019360	MBP	4155	NM_001025081	0	0	1	0	1	1	0	0	0	0	1	1	5
hsa-miR-3975	MIMAT0019360	MBP	4155	NM_001025101	0	0	1	0	1	1	0	0	0	0	1	1	5
hsa-miR-3975	MIMAT0019360	MCAM	4162	XM_005271551	1	0	1	0	0	1	0	0	0	0	1	1	5
hsa-miR-3975	MIMAT0019360	MCAM	4162	NM_006500	1	0	1	0	0	1	0	0	0	0	1	1	5
hsa-miR-3975	MIMAT0019360	MDM4	4194	NM_001204172	1	0	1	0	0	1	0	0	0	0	1	1	5
hsa-miR-3975	MIMAT0019360	MDM4	4194	NM_001278519	1	0	1	0	0	1	0	0	0	0	1	1	5
hsa-miR-3975	MIMAT0019360	MDM4	4194	NM_001278518	1	0	1	0	0	1	0	0	0	0	1	1	5
hsa-miR-3975	MIMAT0019360	MDM4	4194	NM_001278517	1	0	1	0	0	1	0	0	0	0	1	1	5
hsa-miR-3975	MIMAT0019360	MDM4	4194	NM_001204171	1	0	1	0	0	1	0	0	0	0	1	1	5
hsa-miR-3975	MIMAT0019360	MDM4	4194	NM_001278516	1	0	1	0	0	1	0	0	0	0	1	1	5
hsa-miR-3975	MIMAT0019360	MECP2	4204	XM_005274681	1	0	1	0	0	1	0	0	0	0	1	1	5
hsa-miR-3975	MIMAT0019360	MECP2	4204	XM_005277851	1	0	1	0	0	1	0	0	0	0	1	1	5
hsa-miR-3975	MIMAT0019360	MECP2	4204	NM_004992	1	0	1	0	0	1	0	0	0	0	1	1	5
hsa-miR-3975	MIMAT0019360	MECP2	4204	XM_005274682	1	0	1	0	0	1	0	0	0	0	1	1	5
hsa-miR-3975	MIMAT0019360	MECP2	4204	XM_005277852	1	0	1	0	0	1	0	0	0	0	1	1	5
hsa-miR-3975	MIMAT0019360	MET	4233	XM_005250354	1	0	1	0	0	1	0	0	0	0	1	1	5
hsa-miR-3975	MIMAT0019360	MET	4233	NM_000245	1	0	1	0	0	1	0	0	0	0	1	1	5
hsa-miR-3975	MIMAT0019360	MET	4233	NM_001127500	1	0	1	0	0	1	0	0	0	0	1	1	5
hsa-miR-3975	MIMAT0019360	MGAT5	4249	XM_005263670	1	0	1	0	0	1	0	0	0	0	1	1	5
hsa-miR-3975	MIMAT0019360	MGAT5	4249	XM_005263668	1	0	1	0	0	1	0	0	0	0	1	1	5
hsa-miR-3975	MIMAT0019360	MGAT5	4249	XM_005263665	1	0	1	0	0	1	0	0	0	0	1	1	5
hsa-miR-3975	MIMAT0019360	MGAT5	4249	XM_005263667	1	0	1	0	0	1	0	0	0	0	1	1	5
hsa-miR-3975	MIMAT0019360	MGAT5	4249	XM_005263664	1	0	1	0	0	1	0	0	0	0	1	1	5
hsa-miR-3975	MIMAT0019360	MGAT5	4249	XM_005263669	1	0	1	0	0	1	0	0	0	0	1	1	5
hsa-miR-3975	MIMAT0019360	MITF	4286	XM_005264756	1	0	1	0	0	1	0	0	0	0	1	1	5
hsa-miR-3975	MIMAT0019360	MITF	4286	XM_005264755	1	0	1	0	0	1	0	0	0	0	1	1	5
hsa-miR-3975	MIMAT0019360	MITF	4286	XM_005264754	1	0	1	0	0	1	0	0	0	0	1	1	5
hsa-miR-3975	MIMAT0019360	MKLN1	4289	XM_005250356	1	0	1	0	0	1	0	0	0	0	1	1	5
hsa-miR-3975	MIMAT0019360	MKLN1	4289	XM_005250355	1	0	1	0	0	1	0	0	0	0	1	1	5
hsa-miR-3975	MIMAT0019360	MKLN1	4289	NM_013255	1	0	1	0	0	1	0	0	0	0	1	1	5
hsa-miR-3975	MIMAT0019360	MMP15	4324	NM_002428	1	0	1	0	0	1	0	0	0	0	1	1	5
hsa-miR-3975	MIMAT0019360	MOCS1	4337	NM_005943	1	0	1	0	0	1	0	0	0	0	1	1	5
hsa-miR-3975	MIMAT0019360	MOCS1	4337	NM_001075098	1	0	1	0	0	1	0	0	0	0	1	1	5
hsa-miR-3975	MIMAT0019360	MSRA	4482	NM_001135670	1	0	1	0	0	1	0	0	0	0	1	1	5
hsa-miR-3975	MIMAT0019360	MSRA	4482	NM_012331	1	0	1	0	0	1	0	0	0	0	1	1	5
hsa-miR-3975	MIMAT0019360	MSRA	4482	NM_001135671	1	0	1	0	0	1	0	0	0	0	1	1	5
hsa-miR-3975	MIMAT0019360	MTHFR	4524	XM_005263459	1	0	1	0	0	1	0	0	0	0	1	1	5
hsa-miR-3975	MIMAT0019360	MTHFR	4524	XM_005263462	1	0	1	0	0	1	0	0	0	0	1	1	5
hsa-miR-3975	MIMAT0019360	MTHFR	4524	XM_005263463	1	0	1	0	0	1	0	0	0	0	1	1	5
hsa-miR-3975	MIMAT0019360	MTHFR	4524	XM_005263461	1	0	1	0	0	1	0	0	0	0	1	1	5
hsa-miR-3975	MIMAT0019360	MTHFR	4524	XM_005263460	1	0	1	0	0	1	0	0	0	0	1	1	5
hsa-miR-3975	MIMAT0019360	MTHFR	4524	XM_005263458	1	0	1	0	0	1	0	0	0	0	1	1	5
hsa-miR-3975	MIMAT0019360	MTHFR	4524	NM_005957	1	0	1	0	0	1	0	0	0	0	1	1	5
hsa-miR-3975	MIMAT0019360	MUC7	4589	XM_005265693	1	0	1	0	0	1	0	0	0	0	1	1	5
hsa-miR-3975	MIMAT0019360	MUC7	4589	XM_005265695	1	0	1	0	0	1	0	0	0	0	1	1	5
hsa-miR-3975	MIMAT0019360	MUC7	4589	XM_005265694	1	0	1	0	0	1	0	0	0	0	1	1	5
hsa-miR-3975	MIMAT0019360	MYCL	4610	NM_001033081	1	0	1	0	0	1	0	0	0	0	1	1	5
hsa-miR-3975	MIMAT0019360	MYCL	4610	XM_005270887	1	0	1	0	0	1	0	0	0	0	1	1	5
hsa-miR-3975	MIMAT0019360	MYCL	4610	NM_001033082	1	0	1	0	0	1	0	0	0	0	1	1	5
hsa-miR-3975	MIMAT0019360	MYF6	4618	NM_002469	1	0	1	0	0	1	0	0	0	0	1	1	5
hsa-miR-3975	MIMAT0019360	MYO1E	4643	NM_004998	1	0	1	0	0	1	0	0	0	0	1	1	5
hsa-miR-3975	MIMAT0019360	PPP1R12B	4660	NM_001197131	1	0	1	0	0	1	0	0	0	0	1	1	5
hsa-miR-3975	MIMAT0019360	PPP1R12B	4660	NM_032103	1	0	1	0	0	1	0	0	0	0	1	1	5
hsa-miR-3975	MIMAT0019360	PPP1R12B	4660	NM_032104	1	0	1	0	0	1	0	0	0	0	1	1	5
hsa-miR-3975	MIMAT0019360	PPP1R12B	4660	NM_002481	1	0	1	0	0	1	0	0	0	0	1	1	5
hsa-miR-3975	MIMAT0019360	NAGA	4668	XM_005261617	1	0	1	0	0	1	0	0	0	0	1	1	5
hsa-miR-3975	MIMAT0019360	NAGA	4668	XM_005261616	1	0	1	0	0	1	0	0	0	0	1	1	5
hsa-miR-3975	MIMAT0019360	NAGA	4668	XM_005261615	1	0	1	0	0	1	0	0	0	0	1	1	5
hsa-miR-3975	MIMAT0019360	NFIA	4774	NM_001134673	1	0	1	0	0	1	0	0	0	0	1	1	5
hsa-miR-3975	MIMAT0019360	NFIA	4774	NM_001145512	1	0	1	0	0	1	0	0	0	0	1	1	5
hsa-miR-3975	MIMAT0019360	NFIA	4774	NM_001145511	1	0	1	0	0	1	0	0	0	0	1	1	5
hsa-miR-3975	MIMAT0019360	NFIA	4774	NM_005595	1	0	1	0	0	1	0	0	0	0	1	1	5
hsa-miR-3975	MIMAT0019360	NFATC4	4776	NM_001198966	1	0	1	0	0	1	0	0	0	0	1	1	5
hsa-miR-3975	MIMAT0019360	NFATC4	4776	NM_001198967	1	0	1	0	0	1	0	0	0	0	1	1	5
hsa-miR-3975	MIMAT0019360	NFATC4	4776	NM_001198965	1	0	1	0	0	1	0	0	0	0	1	1	5
hsa-miR-3975	MIMAT0019360	NFATC4	4776	NM_004554	1	0	1	0	0	1	0	0	0	0	1	1	5
hsa-miR-3975	MIMAT0019360	NFE2	4778	NM_001261461	1	0	1	0	0	1	0	0	0	0	1	1	5
hsa-miR-3975	MIMAT0019360	NFE2	4778	XM_005268907	1	0	1	0	0	1	0	0	0	0	1	1	5
hsa-miR-3975	MIMAT0019360	NFE2	4778	XM_005268906	1	0	1	0	0	1	0	0	0	0	1	1	5
hsa-miR-3975	MIMAT0019360	NFE2	4778	NM_006163	1	0	1	0	0	1	0	0	0	0	1	1	5
hsa-miR-3975	MIMAT0019360	NFE2	4778	NM_001136023	1	0	1	0	0	1	0	0	0	0	1	1	5
hsa-miR-3975	MIMAT0019360	NFIC	4782	NM_005597	1	0	1	0	0	1	0	0	0	0	1	1	5
hsa-miR-3975	MIMAT0019360	NFIC	4782	NM_001245004	1	0	1	0	0	1	0	0	0	0	1	1	5
hsa-miR-3975	MIMAT0019360	NFIC	4782	NM_001245005	1	0	1	0	0	1	0	0	0	0	1	1	5
hsa-miR-3975	MIMAT0019360	NFIC	4782	NM_001245002	1	0	1	0	0	1	0	0	0	0	1	1	5
hsa-miR-3975	MIMAT0019360	NFX1	4799	NM_002504	1	0	1	0	0	1	0	0	0	0	1	1	5
hsa-miR-3975	MIMAT0019360	NFX1	4799	XM_005251473	1	0	1	0	0	1	0	0	0	0	1	1	5
hsa-miR-3975	MIMAT0019360	NTRK2	4915	NM_001018066	1	0	1	0	0	1	0	0	0	0	1	1	5
hsa-miR-3975	MIMAT0019360	NTRK2	4915	NM_001018065	1	0	1	0	0	1	0	0	0	0	1	1	5
hsa-miR-3975	MIMAT0019360	NTRK2	4915	XM_005252006	1	0	1	0	0	1	0	0	0	0	1	1	5
hsa-miR-3975	MIMAT0019360	NUMA1	4926	NM_006185	1	0	1	0	0	1	0	0	0	0	1	1	5
hsa-miR-3975	MIMAT0019360	P2RX1	5023	NM_002558	1	0	1	0	0	1	0	0	0	0	1	1	5
hsa-miR-3975	MIMAT0019360	P2RY1	5028	NM_002563	1	0	1	0	0	1	0	0	0	0	1	1	5
hsa-miR-3975	MIMAT0019360	PCBP2	5094	NM_005016	1	0	1	0	0	1	0	0	0	0	1	1	5
hsa-miR-3975	MIMAT0019360	PCBP2	5094	NM_001128914	1	0	1	0	0	1	0	0	0	0	1	1	5
hsa-miR-3975	MIMAT0019360	PCBP2	5094	NM_001098620	1	0	1	0	0	1	0	0	0	0	1	1	5
hsa-miR-3975	MIMAT0019360	PCBP2	5094	NM_001128913	1	0	1	0	0	1	0	0	0	0	1	1	5
hsa-miR-3975	MIMAT0019360	PCBP2	5094	NM_001128912	1	0	1	0	0	1	0	0	0	0	1	1	5
hsa-miR-3975	MIMAT0019360	PCBP2	5094	NM_031989	1	0	1	0	0	1	0	0	0	0	1	1	5
hsa-miR-3975	MIMAT0019360	PCBP2	5094	NM_001128911	1	0	1	0	0	1	0	0	0	0	1	1	5
hsa-miR-3975	MIMAT0019360	CDK18	5129	XM_005245240	1	0	1	0	0	1	0	0	0	0	1	1	5
hsa-miR-3975	MIMAT0019360	CDK18	5129	XM_005245243	1	0	1	0	0	1	0	0	0	0	1	1	5
hsa-miR-3975	MIMAT0019360	CDK18	5129	XM_005245241	1	0	1	0	0	1	0	0	0	0	1	1	5
hsa-miR-3975	MIMAT0019360	CDK18	5129	XM_005245242	1	0	1	0	0	1	0	0	0	0	1	1	5
hsa-miR-3975	MIMAT0019360	CDK18	5129	XM_005245239	1	0	1	0	0	1	0	0	0	0	1	1	5
hsa-miR-3975	MIMAT0019360	CDK18	5129	XM_005245238	1	0	1	0	0	1	0	0	0	0	1	1	5
hsa-miR-3975	MIMAT0019360	PDE4B	5142	XM_005270925	1	0	1	0	0	1	0	0	0	0	1	1	5
hsa-miR-3975	MIMAT0019360	PDE4B	5142	XM_005270923	1	0	1	0	0	1	0	0	0	0	1	1	5
hsa-miR-3975	MIMAT0019360	PDE4B	5142	XM_005270926	1	0	1	0	0	1	0	0	0	0	1	1	5
hsa-miR-3975	MIMAT0019360	PDE4B	5142	NM_001037339	1	0	1	0	0	1	0	0	0	0	1	1	5
hsa-miR-3975	MIMAT0019360	PDE4B	5142	XM_005270924	1	0	1	0	0	1	0	0	0	0	1	1	5
hsa-miR-3975	MIMAT0019360	PDE4B	5142	NM_002600	1	0	1	0	0	1	0	0	0	0	1	1	5
hsa-miR-3975	MIMAT0019360	PDE4B	5142	NM_001037340	1	0	1	0	0	1	0	0	0	0	1	1	5
hsa-miR-3975	MIMAT0019360	PDE4C	5143	NM_001098818	1	0	1	0	0	1	0	0	0	0	1	1	5
hsa-miR-3975	MIMAT0019360	PDE4C	5143	NM_001098819	1	0	1	0	0	1	0	0	0	0	1	1	5
hsa-miR-3975	MIMAT0019360	PDE4D	5144	XM_005248541	1	0	1	0	0	1	0	0	0	0	1	1	5
hsa-miR-3975	MIMAT0019360	PDE4D	5144	XM_005248540	1	0	1	0	0	1	0	0	0	0	1	1	5
hsa-miR-3975	MIMAT0019360	PDE4D	5144	XM_005248537	1	0	1	0	0	1	0	0	0	0	1	1	5
hsa-miR-3975	MIMAT0019360	PDE4D	5144	XM_005248539	1	0	1	0	0	1	0	0	0	0	1	1	5
hsa-miR-3975	MIMAT0019360	PDGFRB	5159	NM_002609	1	0	1	0	0	1	0	0	0	0	1	1	5
hsa-miR-3975	MIMAT0019360	PDGFRB	5159	XM_005268464	1	0	1	0	0	1	0	0	0	0	1	1	5
hsa-miR-3975	MIMAT0019360	CFP	5199	NM_002621	1	0	1	0	0	1	0	0	0	0	1	1	5
hsa-miR-3975	MIMAT0019360	CFP	5199	NM_001145252	1	0	1	0	0	1	0	0	0	0	1	1	5
hsa-miR-3975	MIMAT0019360	SERPINE2	5270	XM_005246642	1	0	1	0	0	1	0	0	0	0	1	1	5
hsa-miR-3975	MIMAT0019360	SERPINE2	5270	XM_005246641	1	0	1	0	0	1	0	0	0	0	1	1	5
hsa-miR-3975	MIMAT0019360	PIGC	5279	NM_002642	1	0	1	0	0	1	0	0	0	0	1	1	5
hsa-miR-3975	MIMAT0019360	PIGC	5279	NM_153747	1	0	1	0	0	1	0	0	0	0	1	1	5
hsa-miR-3975	MIMAT0019360	PIK3C2B	5287	XM_005245260	1	0	1	0	0	1	0	0	0	0	1	1	5
hsa-miR-3975	MIMAT0019360	PIK3C2B	5287	XM_005245259	1	0	1	0	0	1	0	0	0	0	1	1	5
hsa-miR-3975	MIMAT0019360	PIK3C2B	5287	XM_005245258	1	0	1	0	0	1	0	0	0	0	1	1	5
hsa-miR-3975	MIMAT0019360	PIK3C2B	5287	NM_002646	1	0	1	0	0	1	0	0	0	0	1	1	5
hsa-miR-3975	MIMAT0019360	PIK3C2B	5287	XM_005245257	1	0	1	0	0	1	0	0	0	0	1	1	5
hsa-miR-3975	MIMAT0019360	PKD1	5310	XM_005255370	1	0	1	0	0	1	0	0	0	0	1	1	5
hsa-miR-3975	MIMAT0019360	PKD1	5310	XM_005255368	1	0	1	0	0	1	0	0	0	0	1	1	5
hsa-miR-3975	MIMAT0019360	PKD1	5310	XM_005255367	1	0	1	0	0	1	0	0	0	0	1	1	5
hsa-miR-3975	MIMAT0019360	PKD1	5310	XM_005255366	1	0	1	0	0	1	0	0	0	0	1	1	5
hsa-miR-3975	MIMAT0019360	PKD1	5310	NM_000296	1	0	1	0	0	1	0	0	0	0	1	1	5
hsa-miR-3975	MIMAT0019360	PKNOX1	5316	NM_004571	1	0	1	0	0	1	0	0	0	0	1	1	5
hsa-miR-3975	MIMAT0019360	PKNOX1	5316	XM_005261138	1	0	1	0	0	1	0	0	0	0	1	1	5
hsa-miR-3975	MIMAT0019360	PLAT	5327	NM_000930	1	0	1	0	0	1	0	0	0	0	1	1	5
hsa-miR-3975	MIMAT0019360	PLAT	5327	XM_005273531	1	0	1	0	0	1	0	0	0	0	1	1	5
hsa-miR-3975	MIMAT0019360	PLAT	5327	XM_005273530	1	0	1	0	0	1	0	0	0	0	1	1	5
hsa-miR-3975	MIMAT0019360	PLAT	5327	NM_033011	1	0	1	0	0	1	0	0	0	0	1	1	5
hsa-miR-3975	MIMAT0019360	PML	5371	NM_033238	1	0	1	0	0	1	0	0	0	0	1	1	5
hsa-miR-3975	MIMAT0019360	PML	5371	XM_005254451	1	0	1	0	0	1	0	0	0	0	1	1	5
hsa-miR-3975	MIMAT0019360	PMP2	5375	NM_002677	1	0	1	0	0	1	0	0	0	0	1	1	5
hsa-miR-3975	MIMAT0019360	POLR2F	5435	NM_021974	1	0	1	0	0	1	0	0	0	0	1	1	5
hsa-miR-3975	MIMAT0019360	POU2F2	5452	XM_005259009	1	0	1	0	0	1	0	0	0	0	1	1	5
hsa-miR-3975	MIMAT0019360	POU2F2	5452	NM_001247994	1	0	1	0	0	1	0	0	0	0	1	1	5
hsa-miR-3975	MIMAT0019360	POU2F2	5452	NM_002698	1	0	1	0	0	1	0	0	0	0	1	1	5
hsa-miR-3975	MIMAT0019360	POU2F2	5452	NM_001207025	1	0	1	0	0	1	0	0	0	0	1	1	5
hsa-miR-3975	MIMAT0019360	POU2F2	5452	XM_005259010	1	0	1	0	0	1	0	0	0	0	1	1	5
hsa-miR-3975	MIMAT0019360	PPP3R2	5535	NM_147180	1	0	1	0	0	1	0	0	0	0	1	1	5
hsa-miR-3975	MIMAT0019360	PRELP	5549	NM_201348	1	0	1	0	0	1	0	0	0	0	1	1	5
hsa-miR-3975	MIMAT0019360	PRKCG	5582	NM_002739	1	0	1	0	0	1	0	0	0	0	1	1	5
hsa-miR-3975	MIMAT0019360	PRKCG	5582	XM_005259054	1	0	1	0	0	1	0	0	0	0	1	1	5
hsa-miR-3975	MIMAT0019360	MAPK4	5596	XM_005258298	1	0	1	0	0	1	0	0	0	0	1	1	5
hsa-miR-3975	MIMAT0019360	MAPK4	5596	NM_002747	1	0	1	0	0	1	0	0	0	0	1	1	5
hsa-miR-3975	MIMAT0019360	MAPK9	5601	NM_001135044	1	0	1	0	0	1	0	0	0	0	1	1	5
hsa-miR-3975	MIMAT0019360	PRODH	5625	NM_016335	1	0	1	0	0	1	0	0	0	0	1	1	5
hsa-miR-3975	MIMAT0019360	PRODH	5625	NM_001195226	1	0	1	0	0	1	0	0	0	0	1	1	5
hsa-miR-3975	MIMAT0019360	PRODH	5625	XM_005261256	1	0	1	0	0	1	0	0	0	0	1	1	5
hsa-miR-3975	MIMAT0019360	PRODH	5625	XM_005261255	1	0	1	0	0	1	0	0	0	0	1	1	5
hsa-miR-3975	MIMAT0019360	PRPS2	5634	NM_001039091	1	0	1	0	0	1	0	0	0	0	1	1	5
hsa-miR-3975	MIMAT0019360	PRPS2	5634	NM_002765	1	0	1	0	0	1	0	0	0	0	1	1	5
hsa-miR-3975	MIMAT0019360	PTGDR	5729	NM_001281469	1	0	1	0	0	1	0	0	0	0	1	1	5
hsa-miR-3975	MIMAT0019360	PTGDR	5729	NM_000953	1	0	1	0	0	1	0	0	0	0	1	1	5
hsa-miR-3975	MIMAT0019360	PTGS1	5742	NM_001271164	1	0	1	0	0	1	0	0	0	0	1	1	5
hsa-miR-3975	MIMAT0019360	PTGS1	5742	NM_001271367	1	0	1	0	0	1	0	0	0	0	1	1	5
hsa-miR-3975	MIMAT0019360	PTGS1	5742	NM_080591	1	0	1	0	0	1	0	0	0	0	1	1	5
hsa-miR-3975	MIMAT0019360	PTGS1	5742	NM_001271165	1	0	1	0	0	1	0	0	0	0	1	1	5
hsa-miR-3975	MIMAT0019360	PTGS1	5742	NM_000962	1	0	1	0	0	1	0	0	0	0	1	1	5
hsa-miR-3975	MIMAT0019360	PTGS1	5742	NM_001271166	1	0	1	0	0	1	0	0	0	0	1	1	5
hsa-miR-3975	MIMAT0019360	PTGS1	5742	XM_005252105	1	0	1	0	0	1	0	0	0	0	1	1	5
hsa-miR-3975	MIMAT0019360	PTGS1	5742	XM_005252106	1	0	1	0	0	1	0	0	0	0	1	1	5
hsa-miR-3975	MIMAT0019360	PTGS1	5742	NM_001271368	1	0	1	0	0	1	0	0	0	0	1	1	5
hsa-miR-3975	MIMAT0019360	PTHLH	5744	NM_198964	1	0	1	0	0	1	0	0	0	0	1	1	5
hsa-miR-3975	MIMAT0019360	PTHLH	5744	NM_002820	1	0	1	0	0	1	0	0	0	0	1	1	5
hsa-miR-3975	MIMAT0019360	PTMS	5763	NM_002824	1	0	1	0	0	1	0	0	0	0	1	1	5
hsa-miR-3975	MIMAT0019360	PTPRB	5787	NM_001109754	1	0	1	0	0	1	0	0	0	0	1	1	5
hsa-miR-3975	MIMAT0019360	PTPRB	5787	NM_001206971	1	0	1	0	0	1	0	0	0	0	1	1	5
hsa-miR-3975	MIMAT0019360	PTPRB	5787	NM_001206972	1	0	1	0	0	1	0	0	0	0	1	1	5
hsa-miR-3975	MIMAT0019360	PTPRB	5787	NM_002837	1	0	1	0	0	1	0	0	0	0	1	1	5
hsa-miR-3975	MIMAT0019360	PTPRF	5792	XM_005271079	1	0	1	0	0	1	0	0	0	0	1	1	5
hsa-miR-3975	MIMAT0019360	PTPRF	5792	XM_005271083	1	0	1	0	0	1	0	0	0	0	1	1	5
hsa-miR-3975	MIMAT0019360	PTPRF	5792	XM_005271082	1	0	1	0	0	1	0	0	0	0	1	1	5
hsa-miR-3975	MIMAT0019360	PTPRF	5792	XM_005271081	1	0	1	0	0	1	0	0	0	0	1	1	5
hsa-miR-3975	MIMAT0019360	PTPRF	5792	XM_005271080	1	0	1	0	0	1	0	0	0	0	1	1	5
hsa-miR-3975	MIMAT0019360	PTPRF	5792	XM_005271078	1	0	1	0	0	1	0	0	0	0	1	1	5
hsa-miR-3975	MIMAT0019360	RAB6A	5870	NM_002869	1	0	1	0	0	1	0	0	0	0	1	1	5
hsa-miR-3975	MIMAT0019360	RAB6A	5870	NM_198896	1	0	1	0	0	1	0	0	0	0	1	1	5
hsa-miR-3975	MIMAT0019360	RAB6A	5870	NM_001243719	1	0	1	0	0	1	0	0	0	0	1	1	5
hsa-miR-3975	MIMAT0019360	RAB6A	5870	NM_001243718	1	0	1	0	0	1	0	0	0	0	1	1	5
hsa-miR-3975	MIMAT0019360	RARB	5915	XM_005265362	1	0	1	0	0	1	0	0	0	0	1	1	5
hsa-miR-3975	MIMAT0019360	RARB	5915	XM_005265361	1	0	1	0	0	1	0	0	0	0	1	1	5
hsa-miR-3975	MIMAT0019360	RARG	5916	NM_001243731	1	0	1	0	0	1	0	0	0	0	1	1	5
hsa-miR-3975	MIMAT0019360	RARG	5916	NM_001243732	1	0	1	0	0	1	0	0	0	0	1	1	5
hsa-miR-3975	MIMAT0019360	RARG	5916	NM_001243730	1	0	1	0	0	1	0	0	0	0	1	1	5
hsa-miR-3975	MIMAT0019360	RARG	5916	NM_001042728	1	0	1	0	0	1	0	0	0	0	1	1	5
hsa-miR-3975	MIMAT0019360	RARG	5916	XM_005269057	1	0	1	0	0	1	0	0	0	0	1	1	5
hsa-miR-3975	MIMAT0019360	RARG	5916	XM_005269056	1	0	1	0	0	1	0	0	0	0	1	1	5
hsa-miR-3975	MIMAT0019360	RARG	5916	NM_000966	1	0	1	0	0	1	0	0	0	0	1	1	5
hsa-miR-3975	MIMAT0019360	RARG	5916	XM_005269055	1	0	1	0	0	1	0	0	0	0	1	1	5
hsa-miR-3975	MIMAT0019360	RDX	5962	NM_002906	1	0	1	0	0	1	0	0	0	0	1	1	5
hsa-miR-3975	MIMAT0019360	RDX	5962	NM_001260494	1	0	1	0	0	1	0	0	0	0	1	1	5
hsa-miR-3975	MIMAT0019360	DPF2	5977	XM_005274150	1	0	1	0	0	1	0	0	0	0	1	1	5
hsa-miR-3975	MIMAT0019360	DPF2	5977	XM_005274149	1	0	1	0	0	1	0	0	0	0	1	1	5
hsa-miR-3975	MIMAT0019360	REST	5978	XM_005265758	1	0	1	0	0	1	0	0	0	0	1	1	5
hsa-miR-3975	MIMAT0019360	REST	5978	XM_005265759	1	0	1	0	0	1	0	0	0	0	1	1	5
hsa-miR-3975	MIMAT0019360	REST	5978	XM_005265762	1	0	1	0	0	1	0	0	0	0	1	1	5
hsa-miR-3975	MIMAT0019360	REST	5978	XM_005265760	1	0	1	0	0	1	0	0	0	0	1	1	5
hsa-miR-3975	MIMAT0019360	REST	5978	XM_005265761	1	0	1	0	0	1	0	0	0	0	1	1	5
hsa-miR-3975	MIMAT0019360	REST	5978	XM_005265757	1	0	1	0	0	1	0	0	0	0	1	1	5
hsa-miR-3975	MIMAT0019360	REST	5978	NM_001193508	1	0	1	0	0	1	0	0	0	0	1	1	5
hsa-miR-3975	MIMAT0019360	RFX5	5993	XM_005245409	1	0	1	0	0	1	0	0	0	0	1	1	5
hsa-miR-3975	MIMAT0019360	RFX5	5993	XM_005245406	1	0	1	0	0	1	0	0	0	0	1	1	5
hsa-miR-3975	MIMAT0019360	RFX5	5993	NM_001025603	1	0	1	0	0	1	0	0	0	0	1	1	5
hsa-miR-3975	MIMAT0019360	RFX5	5993	NM_000449	1	0	1	0	0	1	0	0	0	0	1	1	5
hsa-miR-3975	MIMAT0019360	RFX5	5993	XM_005245405	1	0	1	0	0	1	0	0	0	0	1	1	5
hsa-miR-3975	MIMAT0019360	RFX5	5993	XM_005245407	1	0	1	0	0	1	0	0	0	0	1	1	5
hsa-miR-3975	MIMAT0019360	RPL15	6138	NM_001253384	1	0	1	0	0	1	0	0	0	0	1	1	5
hsa-miR-3975	MIMAT0019360	SC5D	6309	NM_006918	1	0	1	0	1	0	0	0	0	0	1	1	5
hsa-miR-3975	MIMAT0019360	SCNN1A	6337	XM_005253728	1	0	1	0	0	1	0	0	0	0	1	1	5
hsa-miR-3975	MIMAT0019360	SCNN1A	6337	XM_005253732	1	0	1	0	0	1	0	0	0	0	1	1	5
hsa-miR-3975	MIMAT0019360	SCNN1A	6337	XM_005253730	1	0	1	0	0	1	0	0	0	0	1	1	5
hsa-miR-3975	MIMAT0019360	SCNN1A	6337	XM_005253729	1	0	1	0	0	1	0	0	0	0	1	1	5
hsa-miR-3975	MIMAT0019360	SCNN1A	6337	NM_001159575	1	0	1	0	0	1	0	0	0	0	1	1	5
hsa-miR-3975	MIMAT0019360	SCNN1A	6337	NM_001038	1	0	1	0	0	1	0	0	0	0	1	1	5
hsa-miR-3975	MIMAT0019360	SCNN1A	6337	NM_001159576	1	0	1	0	0	1	0	0	0	0	1	1	5
hsa-miR-3975	MIMAT0019360	SCNN1A	6337	XM_005253731	1	0	1	0	0	1	0	0	0	0	1	1	5
hsa-miR-3975	MIMAT0019360	SGCB	6443	XM_005265763	1	0	1	0	0	1	0	0	0	0	1	1	5
hsa-miR-3975	MIMAT0019360	SGCD	6444	XM_005265966	1	0	1	0	0	1	0	0	0	0	1	1	5
hsa-miR-3975	MIMAT0019360	SGCD	6444	XM_005265965	1	0	1	0	0	1	0	0	0	0	1	1	5
hsa-miR-3975	MIMAT0019360	SGCD	6444	NM_001128209	1	0	1	0	0	1	0	0	0	0	1	1	5
hsa-miR-3975	MIMAT0019360	FBXW4	6468	XM_005270053	1	0	1	0	0	1	0	0	0	0	1	1	5
hsa-miR-3975	MIMAT0019360	FBXW4	6468	NM_022039	1	0	1	0	0	1	0	0	0	0	1	1	5
hsa-miR-3975	MIMAT0019360	SHOX	6473	NM_006883	1	0	1	0	0	1	0	0	0	0	1	1	5
hsa-miR-3975	MIMAT0019360	ST8SIA1	6489	NM_003034	1	0	1	0	0	1	0	0	0	0	1	1	5
hsa-miR-3975	MIMAT0019360	SLC11A1	6556	XM_005246794	1	0	1	0	0	1	0	0	0	0	1	1	5
hsa-miR-3975	MIMAT0019360	SLC11A1	6556	XM_005246793	1	0	1	0	0	1	0	0	0	0	1	1	5
hsa-miR-3975	MIMAT0019360	SLC11A1	6556	XM_005246792	1	0	1	0	0	1	0	0	0	0	1	1	5
hsa-miR-3975	MIMAT0019360	SLC15A2	6565	XM_005247723	1	0	1	0	0	1	0	0	0	0	1	1	5
hsa-miR-3975	MIMAT0019360	SLC15A2	6565	XM_005247722	1	0	1	0	0	1	0	0	0	0	1	1	5
hsa-miR-3975	MIMAT0019360	SLC22A5	6584	XM_005272055	1	0	1	0	0	1	0	0	0	0	1	1	5
hsa-miR-3975	MIMAT0019360	SLC22A5	6584	XM_005272056	1	0	1	0	0	1	0	0	0	0	1	1	5
hsa-miR-3975	MIMAT0019360	SLC22A5	6584	NM_003060	1	0	1	0	0	1	0	0	0	0	1	1	5
hsa-miR-3975	MIMAT0019360	SLIT3	6586	NM_003062	1	0	1	0	0	1	0	0	0	0	1	1	5
hsa-miR-3975	MIMAT0019360	SP1	6667	NM_138473	1	0	1	0	0	1	0	0	0	0	1	1	5
hsa-miR-3975	MIMAT0019360	SP1	6667	NM_001251825	1	0	1	0	0	1	0	0	0	0	1	1	5
hsa-miR-3975	MIMAT0019360	SP1	6667	NM_003109	1	0	1	0	0	1	0	0	0	0	1	1	5
hsa-miR-3975	MIMAT0019360	SP4	6671	XM_005249828	1	0	1	0	0	1	0	0	0	0	1	1	5
hsa-miR-3975	MIMAT0019360	SP4	6671	NM_003112	1	0	1	0	0	1	0	0	0	0	1	1	5
hsa-miR-3975	MIMAT0019360	SPTB	6710	NM_000347	1	0	1	0	0	1	0	0	0	0	1	1	5
hsa-miR-3975	MIMAT0019360	SREBF1	6720	NM_001005291	1	0	1	0	0	1	0	0	0	0	1	1	5
hsa-miR-3975	MIMAT0019360	SREBF1	6720	XM_005256774	1	0	1	0	0	1	0	0	0	0	1	1	5
hsa-miR-3975	MIMAT0019360	SREBF1	6720	XM_005256773	1	0	1	0	0	1	0	0	0	0	1	1	5
hsa-miR-3975	MIMAT0019360	SREBF1	6720	XM_005256772	1	0	1	0	0	1	0	0	0	0	1	1	5
hsa-miR-3975	MIMAT0019360	SREBF1	6720	NM_004176	1	0	1	0	0	1	0	0	0	0	1	1	5
hsa-miR-3975	MIMAT0019360	SRPK2	6733	NM_001278273	1	0	1	0	0	1	0	0	0	0	1	1	5
hsa-miR-3975	MIMAT0019360	SRPK2	6733	XM_005250550	1	0	1	0	0	1	0	0	0	0	1	1	5
hsa-miR-3975	MIMAT0019360	SRPK2	6733	XM_005250551	1	0	1	0	0	1	0	0	0	0	1	1	5
hsa-miR-3975	MIMAT0019360	STC1	6781	XM_005273621	1	0	1	0	0	1	0	0	0	0	1	1	5
hsa-miR-3975	MIMAT0019360	SUOX	6821	NM_000456	1	0	1	0	0	1	0	0	0	0	1	1	5
hsa-miR-3975	MIMAT0019360	SUOX	6821	XM_005269112	1	0	1	0	0	1	0	0	0	0	1	1	5
hsa-miR-3975	MIMAT0019360	SUOX	6821	NM_001032387	1	0	1	0	0	1	0	0	0	0	1	1	5
[truncated: 216,329+ more rows]

## Sheet: Selected pairs
Gene	miRNA
PTGFRN	hsa-miR-371a-3p
CDC42BPB	hsa-miR-371a-3p
SHE	hsa-miR-1269a
DPYSL2	hsa-miR-224-5p
RBFOX1	hsa-miR-224-5p
RNF38	hsa-miR-224-5p
TMEM110	hsa-miR-224-5p
LRP6	hsa-miR-224-5p
FZD4	hsa-miR-224-5p
PRPF4B	hsa-miR-224-5p
ITM2B	hsa-miR-224-5p
EPC2	hsa-miR-224-5p
TMOD2	hsa-miR-224-5p
HSDL1	hsa-miR-224-5p
ACSS1	hsa-miR-224-5p
CREBRF	hsa-miR-224-5p
FZD3	hsa-miR-31-5p
SLC1A2	hsa-miR-31-5p
GATAD2B	hsa-miR-31-5p
HLF	hsa-miR-31-5p
NR3C2	hsa-miR-31-5p
PPP6C	hsa-miR-31-5p
TBX19	hsa-miR-31-5p
ATP8A1	hsa-miR-31-5p
CLASP2	hsa-miR-31-5p
TMOD2	hsa-miR-31-5p
ATL2	hsa-miR-31-5p
LBH	hsa-miR-31-5p
CTNND2	hsa-miR-31-5p
IGF2BP1	hsa-miR-371a-3p
LRRC59	hsa-miR-1269a
BRCA1	hsa-miR-224-5p
HTR1D	hsa-miR-224-5p
KPNA4	hsa-miR-224-5p
PPP2R1B	hsa-miR-224-5p
RALA	hsa-miR-224-5p
SMARCC1	hsa-miR-224-5p
MAP3K7	hsa-miR-224-5p
MBD2	hsa-miR-224-5p
STRIP2	hsa-miR-224-5p
SH3KBP1	hsa-miR-224-5p
CAMK2N2	hsa-miR-147b
YWHAE	hsa-miR-31-5p
UBE2K	hsa-miR-31-5p
TM9SF3	hsa-miR-31-5p
NAA15	hsa-miR-31-5p
AK4	hsa-miR-31-5p
ELAVL1	hsa-miR-31-5p
IGFBP7	hsa-miR-31-5p
LASP1	hsa-miR-31-5p
MTFR1	hsa-miR-31-5p
SATB2	hsa-miR-31-5p
TTBK1	hsa-miR-31-5p
KIAA2018	hsa-miR-31-5p
CTDSPL2	hsa-miR-371a-3p
MAN2A2	hsa-miR-371a-3p
PHF2	hsa-miR-371a-3p
DAZAP1	hsa-miR-371a-3p
UBE2O	hsa-miR-371a-3p
ELFN2	hsa-miR-371a-3p
ARX	hsa-miR-371a-3p
LDLRAD4	hsa-miR-31-3p
GRIN2A	hsa-miR-31-3p
TCEB1	hsa-miR-31-3p
CCND1	hsa-miR-1269a
KLF9	hsa-miR-1269a
DYRK1A	hsa-miR-1269a
FOXO1	hsa-miR-1269a
KCNA1	hsa-miR-1269a
MEF2D	hsa-miR-1269a
PPP1R2	hsa-miR-1269a
PTGER4	hsa-miR-1269a
RIT1	hsa-miR-1269a
SLC16A2	hsa-miR-1269a
CYP7B1	hsa-miR-1269a
ZFPM2	hsa-miR-1269a
CDC40	hsa-miR-1269a
MEGF11	hsa-miR-1269a
BMPER	hsa-miR-1269a
KRT24	hsa-miR-1269a
CERS3	hsa-miR-1269a
HOXA5	hsa-miR-224-5p
MAP1B	hsa-miR-224-5p
PDGFRA	hsa-miR-224-5p
SOD1	hsa-miR-224-5p
KAT6A	hsa-miR-224-5p
PIP4K2B	hsa-miR-224-5p
PHOX2B	hsa-miR-224-5p
PJA2	hsa-miR-224-5p
CASC3	hsa-miR-224-5p
NUP133	hsa-miR-224-5p
KIAA1239	hsa-miR-224-5p
KIAA0319L	hsa-miR-224-5p
LCOR	hsa-miR-224-5p
CACNB2	hsa-miR-224-5p
CAMK2D	hsa-miR-224-5p
CDK9	hsa-miR-224-5p
DTNA	hsa-miR-224-5p
ACSL4	hsa-miR-224-5p
GLS	hsa-miR-224-5p
GSK3B	hsa-miR-224-5p
H3F3B	hsa-miR-224-5p
HSBP1	hsa-miR-224-5p
TRIM37	hsa-miR-224-5p
PAX9	hsa-miR-224-5p
POU2F1	hsa-miR-224-5p
PRLR	hsa-miR-224-5p
RELN	hsa-miR-224-5p
PURB	hsa-miR-224-5p
SDC4	hsa-miR-224-5p
SOX11	hsa-miR-224-5p
ELOVL4	hsa-miR-224-5p
TMF1	hsa-miR-224-5p
TSN	hsa-miR-224-5p
NR4A3	hsa-miR-224-5p
PRSS12	hsa-miR-224-5p
API5	hsa-miR-224-5p
CDS2	hsa-miR-224-5p
RIOK3	hsa-miR-224-5p
GABBR2	hsa-miR-224-5p
TRIB1	hsa-miR-224-5p
IPO7	hsa-miR-224-5p
NFAT5	hsa-miR-224-5p
IRAK3	hsa-miR-224-5p
NCOA6	hsa-miR-224-5p
COLGALT2	hsa-miR-224-5p
UBXN4	hsa-miR-224-5p
TBC1D12	hsa-miR-224-5p
PARS2	hsa-miR-224-5p
AFF4	hsa-miR-224-5p
SLMO2	hsa-miR-224-5p
FAM8A1	hsa-miR-224-5p
ANKRD49	hsa-miR-224-5p
CWC25	hsa-miR-224-5p
UHRF1BP1	hsa-miR-224-5p
FAM120C	hsa-miR-224-5p
DDX28	hsa-miR-224-5p
NRIP3	hsa-miR-224-5p
PELI1	hsa-miR-224-5p
SLC39A10	hsa-miR-224-5p
TAOK1	hsa-miR-224-5p
ANAPC1	hsa-miR-224-5p
RAPH1	hsa-miR-224-5p
GGNBP2	hsa-miR-224-5p
JHDM1D	hsa-miR-224-5p
TMEM164	hsa-miR-224-5p
PHF6	hsa-miR-224-5p
ANKRD40	hsa-miR-224-5p
TRIM9	hsa-miR-224-5p
NEK7	hsa-miR-224-5p
SPTY2D1	hsa-miR-224-5p
TMEM161B	hsa-miR-224-5p
NKAIN2	hsa-miR-224-5p
GPR180	hsa-miR-224-5p
DCP2	hsa-miR-224-5p
KIF6	hsa-miR-224-5p
ZNF81	hsa-miR-224-5p
QKI	hsa-miR-224-5p
NDUFA4	hsa-miR-147b
HDAC4	hsa-miR-147b
HIPK2	hsa-miR-147b
C11orf87	hsa-miR-147b
WDR82	hsa-miR-147b
RSBN1	hsa-miR-31-5p
APBB2	hsa-miR-31-5p
CACNB2	hsa-miR-31-5p
SH2D1A	hsa-miR-31-5p
MAP1B	hsa-miR-31-5p
PPP2R2A	hsa-miR-31-5p
PEX5	hsa-miR-31-5p
SLC2A4	hsa-miR-31-5p
SLC6A6	hsa-miR-31-5p
RIMS3	hsa-miR-31-5p
HERPUD2	hsa-miR-31-5p
VPS26B	hsa-miR-31-5p
DUSP19	hsa-miR-31-5p
SPRED1	hsa-miR-31-5p
RHBDL3	hsa-miR-31-5p
ANKRD52	hsa-miR-31-5p
CAMK2D	hsa-miR-31-5p
CLCN3	hsa-miR-31-5p
HBEGF	hsa-miR-31-5p
EIF4EBP2	hsa-miR-31-5p
EIF5	hsa-miR-31-5p
ACSL4	hsa-miR-31-5p
GLRA2	hsa-miR-31-5p
GRM4	hsa-miR-31-5p
IDE	hsa-miR-31-5p
JARID2	hsa-miR-31-5p
MAP3K1	hsa-miR-31-5p
MYO5A	hsa-miR-31-5p
NAGA	hsa-miR-31-5p
PAPPA	hsa-miR-31-5p
PKHD1	hsa-miR-31-5p
PLXNA2	hsa-miR-31-5p
POU2F1	hsa-miR-31-5p
PPP3CA	hsa-miR-31-5p
HTRA1	hsa-miR-31-5p
PTPN1	hsa-miR-31-5p
RASA1	hsa-miR-31-5p
SLC5A3	hsa-miR-31-5p
SP1	hsa-miR-31-5p
TAL1	hsa-miR-31-5p
TFRC	hsa-miR-31-5p
NUMB	hsa-miR-31-5p
CREG1	hsa-miR-31-5p
SYNJ2	hsa-miR-31-5p
MAP3K13	hsa-miR-31-5p
VAPB	hsa-miR-31-5p
AKAP7	hsa-miR-31-5p
LITAF	hsa-miR-31-5p
TRAM2	hsa-miR-31-5p
MLEC	hsa-miR-31-5p
RNF144A	hsa-miR-31-5p
RHOBTB1	hsa-miR-31-5p
SEC24A	hsa-miR-31-5p
TMED10	hsa-miR-31-5p
KDELR2	hsa-miR-31-5p
MAP4K5	hsa-miR-31-5p
MLXIP	hsa-miR-31-5p
ATF6	hsa-miR-31-5p
SEPHS1	hsa-miR-31-5p
VWA8	hsa-miR-31-5p
JMJD6	hsa-miR-31-5p
STX12	hsa-miR-31-5p
CACNG4	hsa-miR-31-5p
SLMO2	hsa-miR-31-5p
RAB14	hsa-miR-31-5p
KLF13	hsa-miR-31-5p
FAM134B	hsa-miR-31-5p
PPP6R3	hsa-miR-31-5p
ELMOD1	hsa-miR-31-5p
PPP1R9A	hsa-miR-31-5p
YLPM1	hsa-miR-31-5p
NRIP3	hsa-miR-31-5p
SLC24A3	hsa-miR-31-5p
NUFIP2	hsa-miR-31-5p
ZSWIM6	hsa-miR-31-5p
CCAR2	hsa-miR-31-5p
GIGYF1	hsa-miR-31-5p
CEP85	hsa-miR-31-5p
CCNJL	hsa-miR-31-5p
ASB13	hsa-miR-31-5p
TRMT1L	hsa-miR-31-5p
STK40	hsa-miR-31-5p
ZIC4	hsa-miR-31-5p
PLXNA4	hsa-miR-31-5p
TEX261	hsa-miR-31-5p
FAM122A	hsa-miR-31-5p
BTBD11	hsa-miR-31-5p
AMER1	hsa-miR-31-5p
SOGA1	hsa-miR-31-5p
VTI1A	hsa-miR-31-5p
JAZF1	hsa-miR-31-5p
GXYLT1	hsa-miR-31-5p
INSC	hsa-miR-31-5p
VGLL3	hsa-miR-31-5p
KHDRBS3	hsa-miR-31-5p
HIAT1	hsa-miR-31-5p
