# Supplementary material for: miR-224, miR-147b and miR-31 associated with lymph node metastasis and prognosis for lung adenocarcinoma by regulating PRPF4B, WDR82 or NR3C2
Source: PeerJ. 2020 Nov 24;8:e9704. doi: 10.7717/peerj.9704 (PMC7694553; doi:10.7717/peerj.9704)
Supplement: Table S2 [file peerj-08-9704-s002.xlsx]

## Sheet: Sheet1
Category	Term	Count	%	PValue	Genes	List Total	Pop Hits	Pop Total	Fold Enrichment	Bonferroni	Benjamini	FDR
GOTERM_BP_DIRECT	GO:0006468~protein phosphorylation	17	0.0397921	0.000469181	PRPF4B, TAOK1, CDK9, TRIB1, IRAK3, MAP4K5, CCND1, STK40, RIOK3, GSK3B, MAP3K1, DYRK1A, HIPK2, CAMK2D, MAP3K13, NEK7, CDC42BPB	227	456	16792	2.75779	0.501872	0.501872	0.775772
REACTOME_PATHWAY	R-HSA-399956:R-HSA-399956	4	0.00936286	0.00119606	PLXNA4, PLXNA2, GSK3B, DPYSL2	124	16	9075	18.2964	0.314072	0.314072	1.59823
GOTERM_BP_DIRECT	GO:0006351~transcription, DNA-templated	43	0.100651	0.00142253	CREBRF, LITAF, ZNF81, YLPM1, NR3C2, CTNND2, NAA15, FOXO1, MAP3K7, ARX, TAL1, EPC2, LBH, PAX9, POU2F1, GATAD2B, MLXIP, CCAR2, SATB2, KHDRBS3, KLF9, JARID2, SPTY2D1, NR4A3, MBD2, PURB, BRCA1, TRIM37, ATF6, HDAC4, MEF2D, CCND1, PHF2, JMJD6, SMARCC1, HIPK2, JAZF1, ZFPM2, VGLL3, LCOR, TBX19, KAT6A, PHF6	227	1955	16792	1.62704	0.879241	0.652495	2.3347
KEGG_PATHWAY	hsa04152:AMPK signaling pathway	8	0.0187257	0.00157382	MAP3K7, PPP2R1B, CCND1, SLC2A4, RAB14, ELAVL1, FOXO1, PPP2R2A	97	123	6879	4.61252	0.230073	0.230073	1.89562
GOTERM_BP_DIRECT	GO:0007268~chemical synaptic transmission	11	0.0257479	0.00157589	MYO5A, GRM4, SLC1A2, GLS, KCNA1, LRP6, GRIN2A, CACNB2, GABBR2, HTR1D, DTNA	227	240	16792	3.39046	0.903869	0.541905	2.58332
KEGG_PATHWAY	hsa04120:Ubiquitin mediated proteolysis	8	0.0187257	0.0029102	ANAPC1, TRIM37, UBE2O, UBE2K, MAP3K1, RHOBTB1, TCEB1, BRCA1	97	137	6879	4.14117	0.383562	0.214864	3.4793
GOTERM_BP_DIRECT	GO:0001764~neuron migration	7	0.016385	0.00295905	PHOX2B, SATB2, PEX5, RELN, FZD3, APBB2, YWHAE	227	105	16792	4.93157	0.987731	0.667187	4.7989
KEGG_PATHWAY	hsa04310:Wnt signaling pathway	8	0.0187257	0.00303135	MAP3K7, CCND1, GSK3B, LRP6, CAMK2D, FZD3, PPP3CA, FZD4	97	138	6879	4.11116	0.395871	0.154637	3.62171
GOTERM_BP_DIRECT	GO:1900034~regulation of cellular response to heat	6	0.0140443	0.00339558	NUP133, GSK3B, CAMK2D, HSBP1, YWHAE, CCAR2	227	75	16792	5.91789	0.993597	0.635855	5.48826
GOTERM_BP_DIRECT	GO:0045944~positive regulation of transcription from RNA polymerase II promoter	25	0.0585179	0.00340467	HLF, FOXO1, TAL1, PAX9, HOXA5, NFAT5, PPP3CA, PHOX2B, SATB2, KLF13, SOX11, CDK9, NR4A3, BRCA1, ATF6, MEF2D, HDAC4, SP1, GSK3B, SMARCC1, NCOA6, HIPK2, LRP6, ZFPM2, TBX19	227	981	16792	1.88516	0.993683	0.570053	5.50256
GOTERM_BP_DIRECT	GO:0008286~insulin receptor signaling pathway	6	0.0140443	0.00402096	EIF4EBP2, SOGA1, SMARCC1, IDE, FOXO1, PTPN1	227	78	16792	5.69027	0.997479	0.574605	6.46766
GOTERM_BP_DIRECT	GO:0021766~hippocampus development	5	0.0117036	0.00679162	GSK3B, KCNA1, RELN, NR4A3, YWHAE	227	56	16792	6.60478	0.99996	0.717759	10.6932
GOTERM_BP_DIRECT	GO:0001975~response to amphetamine	4	0.00936286	0.00819117	GRIN2A, DPYSL2, PPP3CA, SOD1	227	31	16792	9.54498	0.999995	0.742596	12.7588
REACTOME_PATHWAY	R-HSA-4641262:R-HSA-4641262	4	0.00936286	0.00828177	PPP2R1B, AMER1, GSK3B, LRP6	124	31	9075	9.44329	0.92717	0.730129	10.5917
GOTERM_BP_DIRECT	GO:0045893~positive regulation of transcription, DNA-templated	15	0.0351107	0.0101307	SOX11, NAA15, FOXO1, FZD4, BRCA1, HDAC4, TAL1, LBH, SP1, ANKRD49, SMARCC1, NCOA6, HIPK2, LRP6, KAT6A	227	515	16792	2.15457	1	0.77955	15.5473
GOTERM_BP_DIRECT	GO:0051091~positive regulation of sequence-specific DNA binding transcription factor activity	6	0.0140443	0.0137606	TRIM37, HDAC4, HIPK2, LRP6, PPP3CA, FZD4	227	105	16792	4.22706	1	0.845965	20.5422
GOTERM_BP_DIRECT	GO:0048704~embryonic skeletal system morphogenesis	4	0.00936286	0.0153973	SATB2, HOXA5, SOX11, PDGFRA	227	39	16792	7.58703	1	0.830097	22.7025
REACTOME_PATHWAY	R-HSA-5467340:R-HSA-5467340	3	0.00702214	0.0149069	PPP2R1B, AMER1, GSK3B	124	14	9075	15.6826	0.991183	0.793408	18.3063
REACTOME_PATHWAY	R-HSA-5467348:R-HSA-5467348	3	0.00702214	0.0149069	PPP2R1B, AMER1, GSK3B	124	14	9075	15.6826	0.991183	0.793408	18.3063
REACTOME_PATHWAY	R-HSA-5467337:R-HSA-5467337	3	0.00702214	0.0149069	PPP2R1B, AMER1, GSK3B	124	14	9075	15.6826	0.991183	0.793408	18.3063
GOTERM_BP_DIRECT	GO:0007223~Wnt signaling pathway, calcium modulating pathway	4	0.00936286	0.0153973	MAP3K7, FZD3, PPP3CA, FZD4	227	39	16792	7.58703	1	0.830097	22.7025
GOTERM_BP_DIRECT	GO:0007399~nervous system development	10	0.0234071	0.0158976	RBFOX1, MEF2D, HDAC4, SMARCC1, DYRK1A, MAP1B, TMOD2, DPYSL2, INSC, ITM2B	227	287	16792	2.57748	1	0.817285	23.3517
GOTERM_BP_DIRECT	GO:0006357~regulation of transcription from RNA polymerase II promoter	13	0.0304293	0.01649	SATB2, KLF9, LITAF, BRCA1, ATF6, TAL1, EPC2, SMARCC1, CREG1, CAMK2D, VGLL3, TCEB1, TBX19	227	441	16792	2.18063	1	0.807204	24.1138
GOTERM_BP_DIRECT	GO:0000122~negative regulation of transcription from RNA polymerase II promoter	18	0.0421329	0.0177025	CREBRF, SATB2, JARID2, SOX11, FOXO1, NR4A3, HSBP1, MBD2, PURB, TRIM37, ARX, TAL1, HDAC4, CCND1, HIPK2, JAZF1, GATAD2B, ZFPM2	227	720	16792	1.84934	1	0.78991	25.6516
GOTERM_BP_DIRECT	GO:0007566~embryo implantation	4	0.00936286	0.0187828	PRLR, IGFBP7, H3F3B, SOD1	227	42	16792	7.0451	1	0.790769	26.9969
REACTOME_PATHWAY	R-HSA-5358751:R-HSA-5358751	3	0.00702214	0.0170493	PPP2R1B, AMER1, GSK3B	124	15	9075	14.6371	0.995559	0.741849	20.666
REACTOME_PATHWAY	R-HSA-5339716:R-HSA-5339716	3	0.00702214	0.0170493	PPP2R1B, AMER1, GSK3B	124	15	9075	14.6371	0.995559	0.741849	20.666
REACTOME_PATHWAY	R-HSA-5358747:R-HSA-5358747	3	0.00702214	0.0170493	PPP2R1B, AMER1, GSK3B	124	15	9075	14.6371	0.995559	0.741849	20.666
REACTOME_PATHWAY	R-HSA-5358749:R-HSA-5358749	3	0.00702214	0.0170493	PPP2R1B, AMER1, GSK3B	124	15	9075	14.6371	0.995559	0.741849	20.666
REACTOME_PATHWAY	R-HSA-5358752:R-HSA-5358752	3	0.00702214	0.0170493	PPP2R1B, AMER1, GSK3B	124	15	9075	14.6371	0.995559	0.741849	20.666
GOTERM_BP_DIRECT	GO:0042493~response to drug	10	0.0234071	0.0221878	HDAC4, SLC1A2, CCND1, GRIN2A, CDK9, FZD3, DPYSL2, AK4, SOD1, HTR1D	227	304	16792	2.43334	1	0.795393	31.0892
KEGG_PATHWAY	hsa04390:Hippo signaling pathway	7	0.016385	0.0186036	PPP2R1B, CCND1, GSK3B, FZD3, FZD4, YWHAE, PPP2R2A	97	151	6879	3.28757	0.955723	0.541283	20.4017
GOTERM_BP_DIRECT	GO:0060070~canonical Wnt signaling pathway	5	0.0117036	0.0257066	CCND1, GSK3B, LRP6, FZD3, FZD4	227	83	16792	4.45624	1	0.800392	35.091
GOTERM_BP_DIRECT	GO:0035914~skeletal muscle cell differentiation	4	0.00936286	0.0281585	PHOX2B, MEF2D, HLF, SOX11	227	49	16792	6.03866	1	0.816698	37.7493
GOTERM_BP_DIRECT	GO:0007254~JNK cascade	4	0.00936286	0.0281585	MAP3K7, PTGER4, MAP3K13, TRIB1	227	49	16792	6.03866	1	0.816698	37.7493
GOTERM_BP_DIRECT	GO:1904886~beta-catenin destruction complex disassembly	3	0.00702214	0.0349086	AMER1, GSK3B, LRP6	227	22	16792	10.0873	1	0.858334	44.5488
REACTOME_PATHWAY	R-HSA-196299:R-HSA-196299	3	0.00702214	0.0216975	PPP2R1B, AMER1, GSK3B	124	17	9075	12.9151	0.999002	0.748922	25.5704
GOTERM_BP_DIRECT	GO:0043044~ATP-dependent chromatin remodeling	3	0.00702214	0.0379006	SMARCC1, GATAD2B, MBD2	227	23	16792	9.64873	1	0.871158	47.3338
GOTERM_BP_DIRECT	GO:0001570~vasculogenesis	4	0.00936286	0.0395892	QKI, ZFPM2, FZD4, RASA1	227	56	16792	5.28383	1	0.87362	48.8469
GOTERM_BP_DIRECT	GO:0006469~negative regulation of protein kinase activity	5	0.0117036	0.0447144	CEP85, DUSP19, LRP6, CAMK2N2, TRIB1	227	99	16792	3.73604	1	0.88031	53.1934
KEGG_PATHWAY	hsa04010:MAPK signaling pathway	9	0.0210664	0.0244916	MAP3K7, TAOK1, MAP3K1, PDGFRA, CACNG4, CACNB2, PPP3CA, MAP3K13, RASA1	97	253	6879	2.52276	0.983694	0.560995	26.0142
GOTERM_BP_DIRECT	GO:0048208~COPII vesicle coating	4	0.00936286	0.048981	PPP6C, SEC24A, TMED10, PPP6R3	227	61	16792	4.85073	1	0.888473	56.5443
GOTERM_BP_DIRECT	GO:0018107~peptidyl-threonine phosphorylation	4	0.00936286	0.0143526	GSK3B, DYRK1A, HIPK2, CAMK2D	227	38	16792	7.78669	1	0.832874	21.3301
REACTOME_PATHWAY	R-HSA-1445148:R-HSA-1445148	5	0.0117036	0.0259914	MYO5A, SLC2A4, RAB14, RALA, YWHAE	124	83	9075	4.40876	0.99975	0.749074	29.85
GOTERM_BP_DIRECT	GO:0048485~sympathetic nervous system development	3	0.00702214	0.016873	PHOX2B, PLXNA4, SOX11	227	15	16792	14.7947	1	0.793898	24.6027
GOTERM_BP_DIRECT	GO:0010613~positive regulation of cardiac muscle hypertrophy	3	0.00702214	0.0191143	CAMK2D, CDK9, NR4A3	227	16	16792	13.87	1	0.778736	27.4051
GOTERM_BP_DIRECT	GO:0050804~modulation of synaptic transmission	3	0.00702214	0.0214732	EIF4EBP2, RELN, PPP3CA	227	17	16792	13.0542	1	0.800462	30.2486
KEGG_PATHWAY	hsa05014:Amyotrophic lateral sclerosis (ALS)	4	0.00936286	0.0321919	SLC1A2, GRIN2A, PPP3CA, SOD1	97	50	6879	5.6734	0.995625	0.595576	32.8063
KEGG_PATHWAY	hsa04728:Dopaminergic synapse	6	0.0140443	0.0328712	PPP2R1B, GSK3B, CAMK2D, GRIN2A, PPP3CA, PPP2R2A	97	128	6879	3.32426	0.996106	0.547341	33.3771
GOTERM_BP_DIRECT	GO:0060749~mammary gland alveolus development	3	0.00702214	0.0214732	CCND1, PRLR, HOXA5	227	17	16792	13.0542	1	0.800462	30.2486
KEGG_PATHWAY	hsa03015:mRNA surveillance pathway	5	0.0117036	0.0378992	PPP2R1B, CASC3, WDR82, PPP2R2A, DAZAP1	97	91	6879	3.89657	0.998361	0.551433	37.4659
GOTERM_BP_DIRECT	GO:0030968~endoplasmic reticulum unfolded protein response	4	0.00936286	0.0225476	ATF6, CCND1, VAPB, PTPN1	227	45	16792	6.57543	1	0.785487	31.5087
GOTERM_BP_DIRECT	GO:0030514~negative regulation of BMP signaling pathway	4	0.00936286	0.0225476	BMPER, HTRA1, HIPK2, CTDSPL2	227	45	16792	6.57543	1	0.785487	31.5087
GOTERM_BP_DIRECT	GO:0045860~positive regulation of protein kinase activity	4	0.00936286	0.0252687	PPP1R9A, DUSP19, RELN, SDC4	227	47	16792	6.29562	1	0.808419	34.6052
GOTERM_BP_DIRECT	GO:0071157~negative regulation of cell cycle arrest	3	0.00702214	0.0292197	PHOX2B, CCND1, CDK9	227	20	16792	11.096	1	0.816173	38.8678
GOTERM_BP_DIRECT	GO:0090311~regulation of protein deacetylation	2	0.00468143	0.0398377	SPRED1, CCAR2	227	3	16792	49.3157	1	0.866322	49.0662
GOTERM_BP_DIRECT	GO:0001819~positive regulation of cytokine production	3	0.00702214	0.0409869	PELI1, SOD1, TMF1	227	24	16792	9.2467	1	0.865309	50.0684
GOTERM_BP_DIRECT	GO:0048661~positive regulation of smooth muscle cell proliferation	4	0.00936286	0.0470226	HDAC4, CAMK2D, HBEGF, NR4A3	227	60	16792	4.93157	1	0.885523	55.0352
REACTOME_PATHWAY	R-HSA-4086398:R-HSA-4086398	4	0.00936286	0.0495572	MAP3K7, FZD3, PPP3CA, FZD4	124	61	9075	4.79905	1	0.898453	49.5536
