# Supplementary material for: miR-224, miR-147b and miR-31 associated with lymph node metastasis and prognosis for lung adenocarcinoma by regulating PRPF4B, WDR82 or NR3C2
Source: PeerJ. 2020 Nov 24;8:e9704. doi: 10.7717/peerj.9704 (PMC7694553; doi:10.7717/peerj.9704)
Supplement: Table S3 [file peerj-08-9704-s003.xlsx]

## Sheet: interaction pairs
#node1	node2	node1_string_internal_id	node2_string_internal_id	node1_external_id	node2_external_id	neighborhood_on_chromosome	gene_fusion	phylogenetic_cooccurrence	homology	coexpression	experimentally_determined_interaction	database_annotated	automated_textmining	combined_score
CDK9	AFF4	4444147	4435588	9606.ENSP00000362361	9606.ENSP00000265343	0	0	0	0	0	0.98	0.9	0.773	0.999
PPP2R2A	PPP2R1B	4439736	4438679	9606.ENSP00000325074	9606.ENSP00000311344	0	0	0	0	0.141	0.966	0.9	0.688	0.998
GATAD2B	MBD2	4443143	4434481	9606.ENSP00000357644	9606.ENSP00000256429	0	0	0	0	0.062	0.975	0.9	0.153	0.997
PPP6C	PPP6R3	4447729	4446190	9606.ENSP00000392147	9606.ENSP00000377390	0	0	0	0	0.062	0.829	0.9	0.883	0.997
CWC25	CDC40	4451270	4443232	9606.ENSP00000478070	9606.ENSP00000357928	0	0	0	0	0.062	0.8	0.9	0.785	0.995
GSK3B	LRP6	4439717	4434860	9606.ENSP00000324806	9606.ENSP00000261349	0	0	0	0	0.058	0.472	0.9	0.899	0.994
GSK3B	CCND1	4439717	4433391	9606.ENSP00000324806	9606.ENSP00000227507	0	0	0	0	0	0.526	0.9	0.822	0.99
GSK3B	DPYSL2	4439717	4438513	9606.ENSP00000324806	9606.ENSP00000309539	0	0	0	0	0.064	0.454	0.9	0.686	0.981
CDC40	CASC3	4443232	4435465	9606.ENSP00000357928	9606.ENSP00000264645	0	0	0	0	0.055	0.8	0.9	0	0.979
NUMB	DPYSL2	4450355	4438513	9606.ENSP00000451300	9606.ENSP00000309539	0	0	0	0	0	0.465	0.9	0.624	0.978
VTI1A	STX12	4446102	4444293	9606.ENSP00000376792	9606.ENSP00000363054	0	0	0	0	0.144	0.759	0.54	0.799	0.978
MEF2D	HDAC4	4435982	4435457	9606.ENSP00000271555	9606.ENSP00000264606	0	0	0	0	0.063	0.473	0.9	0.565	0.975
FZD4	LRP6	4449697	4434860	9606.ENSP00000434034	9606.ENSP00000261349	0	0	0	0	0.065	0.187	0.9	0.687	0.973
KAT6A	H3F3B	4446616	4434387	9606.ENSP00000380136	9606.ENSP00000254810	0	0	0	0	0	0.956	0	0.195	0.963
RAB14	SLC2A4	4444272	4439402	9606.ENSP00000362946	9606.ENSP00000320935	0	0	0	0	0.055	0.051	0.9	0.626	0.961
TMED10	KDELR2	4437932	4434650	9606.ENSP00000303145	9606.ENSP00000258739	0	0	0	0	0.408	0.262	0.9	0.203	0.96
SH3KBP1	SYNJ2	4446733	4441760	9606.ENSP00000380921	9606.ENSP00000347792	0	0	0	0	0.062	0.364	0.9	0.421	0.96
HDAC4	YWHAE	4435457	4435415	9606.ENSP00000264606	9606.ENSP00000264335	0	0	0	0	0.057	0.597	0.9	0	0.958
SPRED1	RASA1	4437534	4436131	9606.ENSP00000299084	9606.ENSP00000274376	0	0	0	0	0.061	0	0.9	0.592	0.958
RELN	GRIN2A	4447749	4446563	9606.ENSP00000392423	9606.ENSP00000379818	0	0	0	0	0.116	0	0.9	0.526	0.954
POU2F1	SP1	4442973	4440095	9606.ENSP00000356840	9606.ENSP00000329357	0	0	0	0	0.063	0.403	0.9	0.27	0.953
GRIN2A	CAMK2D	4446563	4440982	9606.ENSP00000379818	9606.ENSP00000339740	0	0	0	0	0.054	0.266	0.9	0.413	0.953
PPP3CA	PPP2R2A	4446333	4439736	9606.ENSP00000378323	9606.ENSP00000325074	0	0	0	0	0.133	0.291	0.9	0.307	0.951
BRCA1	POU2F1	4448999	4442973	9606.ENSP00000418960	9606.ENSP00000356840	0	0	0	0	0	0.442	0.9	0.197	0.951
RASA1	PDGFRA	4436131	4434540	9606.ENSP00000274376	9606.ENSP00000257290	0	0	0	0	0	0.448	0.9	0.137	0.948
PPP3CA	MEF2D	4446333	4435982	9606.ENSP00000378323	9606.ENSP00000271555	0	0	0	0	0.062	0.143	0.9	0.427	0.947
MAP3K7	PELI1	4443300	4442187	9606.ENSP00000358335	9606.ENSP00000351789	0	0	0	0	0.061	0.261	0.9	0.324	0.946
HIPK2	MAP3K7	4447246	4443300	9606.ENSP00000385571	9606.ENSP00000358335	0	0	0	0.556	0.062	0.472	0.9	0.067	0.946
RELN	MAP1B	4447749	4437332	9606.ENSP00000392423	9606.ENSP00000296755	0	0	0	0	0.12	0	0.9	0.406	0.943
PJA2	UBE2O	4442539	4439626	9606.ENSP00000354775	9606.ENSP00000323687	0	0	0	0	0.064	0.193	0.9	0.323	0.942
SLC2A4	RALA	4439402	4432558	9606.ENSP00000320935	9606.ENSP00000005257	0	0	0	0	0.055	0	0.9	0.44	0.942
HDAC4	CCND1	4435457	4433391	9606.ENSP00000264606	9606.ENSP00000227507	0	0	0	0	0.061	0.071	0.9	0.402	0.94
PLXNA4	DPYSL2	4442296	4438513	9606.ENSP00000352882	9606.ENSP00000309539	0	0	0	0	0.09	0	0.9	0.393	0.939
ANAPC1	TRIM37	4440924	4435049	9606.ENSP00000339109	9606.ENSP00000262294	0	0	0	0	0.096	0	0.9	0.378	0.938
MYO5A	RALA	4446900	4432558	9606.ENSP00000382177	9606.ENSP00000005257	0	0	0	0	0.051	0.169	0.9	0.317	0.938
TFRC	SYNJ2	4442333	4441760	9606.ENSP00000353224	9606.ENSP00000347792	0	0	0	0	0	0	0.9	0.4	0.937
MYO5A	RAB14	4446900	4444272	9606.ENSP00000382177	9606.ENSP00000362946	0	0	0	0	0.051	0.169	0.9	0.296	0.937
CDK9	SP1	4444147	4440095	9606.ENSP00000362361	9606.ENSP00000329357	0	0	0	0	0.059	0.05	0.9	0.376	0.936
TCEB1	UBE2K	4451272	4434874	9606.ENSP00000478121	9606.ENSP00000261427	0	0	0	0	0.132	0	0.9	0.316	0.935
SEC24A	TMED10	4446864	4437932	9606.ENSP00000381823	9606.ENSP00000303145	0	0	0	0	0.13	0.124	0.9	0.227	0.933
PLXNA2	DPYSL2	4442793	4438513	9606.ENSP00000356000	9606.ENSP00000309539	0	0	0	0	0.056	0	0.9	0.345	0.932
PPP3CA	WDR82	4446333	4437290	9606.ENSP00000378323	9606.ENSP00000296490	0	0	0	0	0.062	0.303	0.9	0.09	0.932
PJA2	UBE2K	4442539	4434874	9606.ENSP00000354775	9606.ENSP00000261427	0	0	0	0	0.157	0.193	0.9	0.118	0.932
GRM4	GABBR2	4449953	4434703	9606.ENSP00000440556	9606.ENSP00000259455	0	0	0	0.553	0.159	0.155	0.9	0.252	0.93
MYO5A	SLC2A4	4446900	4439402	9606.ENSP00000382177	9606.ENSP00000320935	0	0	0	0	0.062	0.05	0.9	0.29	0.928
HTR1D	GABBR2	4444424	4434703	9606.ENSP00000363748	9606.ENSP00000259455	0	0	0	0	0.053	0	0.9	0.304	0.928
AMER1	LRP6	4440074	4434860	9606.ENSP00000329117	9606.ENSP00000261349	0	0	0	0	0.061	0	0.9	0.298	0.928
GRM4	HTR1D	4449953	4444424	9606.ENSP00000440556	9606.ENSP00000363748	0	0	0	0	0	0.057	0.9	0.297	0.927
MAP3K1	MAP3K7	4446923	4443300	9606.ENSP00000382423	9606.ENSP00000358335	0	0	0	0.591	0.064	0.085	0.9	0.506	0.925
SH3KBP1	TFRC	4446733	4442333	9606.ENSP00000380921	9606.ENSP00000353224	0	0	0	0	0	0	0.9	0.284	0.925
PPP3CA	SYNJ2	4446333	4441760	9606.ENSP00000378323	9606.ENSP00000347792	0	0	0	0	0.062	0.264	0.9	0	0.924
MAP3K7	MAP4K5	4443300	4432593	9606.ENSP00000358335	9606.ENSP00000013125	0	0	0	0.585	0.107	0.064	0.9	0.419	0.923
PPP6C	SEC24A	4447729	4446864	9606.ENSP00000392147	9606.ENSP00000381823	0	0	0	0	0	0.262	0.9	0	0.923
BRCA1	CDK9	4448999	4444147	9606.ENSP00000418960	9606.ENSP00000362361	0	0	0	0	0.055	0	0.9	0.257	0.923
RAB14	RALA	4444272	4432558	9606.ENSP00000362946	9606.ENSP00000005257	0	0	0.434	0.786	0.148	0	0.9	0.191	0.921
UBE2O	UBE2K	4439626	4434874	9606.ENSP00000323687	9606.ENSP00000261427	0	0	0	0.646	0	0	0.9	0.621	0.921
RAB14	YWHAE	4444272	4435415	9606.ENSP00000362946	9606.ENSP00000264335	0	0	0	0	0.049	0.166	0.9	0.123	0.921
MAP3K1	MAP4K5	4446923	4432593	9606.ENSP00000382423	9606.ENSP00000013125	0	0	0	0.568	0.054	0	0.9	0.467	0.92
PLXNA2	GSK3B	4442793	4439717	9606.ENSP00000356000	9606.ENSP00000324806	0	0	0	0	0.061	0.085	0.9	0.185	0.92
CACNB2	CACNG4	4439325	4435015	9606.ENSP00000320025	9606.ENSP00000262138	0	0	0	0	0.063	0	0.9	0.198	0.918
ANAPC1	UBE2K	4440924	4434874	9606.ENSP00000339109	9606.ENSP00000261427	0	0	0	0	0.077	0	0.9	0.163	0.916
CDC40	NUP133	4443232	4434869	9606.ENSP00000357928	9606.ENSP00000261396	0	0	0	0	0.094	0	0.9	0.153	0.916
SLC2A4	YWHAE	4439402	4435415	9606.ENSP00000320935	9606.ENSP00000264335	0	0	0	0	0	0	0.9	0.187	0.915
TCEB1	ASB13	4451272	4442033	9606.ENSP00000478121	9606.ENSP00000350331	0	0	0	0	0	0.174	0.9	0.056	0.915
SMARCC1	CCND1	4434360	4433391	9606.ENSP00000254480	9606.ENSP00000227507	0	0	0	0	0	0	0.9	0.186	0.915
MAP3K1	SP1	4446923	4440095	9606.ENSP00000382423	9606.ENSP00000329357	0	0	0	0	0.091	0.07	0.9	0.108	0.914
TMF1	VTI1A	4446829	4446102	9606.ENSP00000381567	9606.ENSP00000376792	0	0	0	0	0.055	0	0.9	0.164	0.914
GSK3B	PPP2R1B	4439717	4438679	9606.ENSP00000324806	9606.ENSP00000311344	0	0	0	0	0.064	0	0.9	0.15	0.913
CAMK2D	MEF2D	4440982	4435982	9606.ENSP00000339740	9606.ENSP00000271555	0	0	0	0	0.055	0	0.9	0.156	0.913
PLXNA4	GSK3B	4442296	4439717	9606.ENSP00000352882	9606.ENSP00000324806	0	0	0	0	0.061	0.085	0.9	0.099	0.912
ELAVL1	CASC3	4447216	4435465	9606.ENSP00000385269	9606.ENSP00000264645	0	0	0	0	0.061	0	0.9	0.13	0.911
POU2F1	CCND1	4442973	4433391	9606.ENSP00000356840	9606.ENSP00000227507	0	0	0	0	0.062	0	0.9	0.135	0.911
ELAVL1	CDC40	4447216	4443232	9606.ENSP00000385269	9606.ENSP00000357928	0	0	0	0	0.155	0	0.9	0	0.911
FZD3	FZD4	4449820	4449697	9606.ENSP00000437489	9606.ENSP00000434034	0	0	0	0.85	0	0	0.9	0.757	0.911
FZD3	LRP6	4449820	4434860	9606.ENSP00000437489	9606.ENSP00000261349	0	0	0	0	0	0.13	0.8	0.527	0.91
RELN	SH3KBP1	4447749	4446733	9606.ENSP00000392423	9606.ENSP00000380921	0	0	0	0	0	0	0.9	0.146	0.91
TRIM37	UBE2K	4435049	4434874	9606.ENSP00000262294	9606.ENSP00000261427	0	0	0	0	0.063	0.084	0.9	0.068	0.909
BRCA1	ANAPC1	4448999	4440924	9606.ENSP00000418960	9606.ENSP00000339109	0	0	0	0	0.097	0	0.9	0.082	0.909
PPP2R1B	NUP133	4438679	4434869	9606.ENSP00000311344	9606.ENSP00000261396	0	0	0	0	0.129	0	0.9	0	0.909
TRIM9	TRIM37	4437487	4435049	9606.ENSP00000298355	9606.ENSP00000262294	0	0	0	0.547	0.082	0	0.9	0.126	0.908
PRLR	HBEGF	4451730	4433516	9606.ENSP00000482954	9606.ENSP00000230990	0	0	0	0	0	0	0.9	0.121	0.908
PPP3CA	SOD1	4446333	4435927	9606.ENSP00000378323	9606.ENSP00000270142	0	0	0	0	0	0.379	0.8	0.319	0.908
TCEB1	BRCA1	4451272	4448999	9606.ENSP00000478121	9606.ENSP00000418960	0	0	0	0	0	0	0.9	0.122	0.908
FOXO1	YWHAE	4445233	4435415	9606.ENSP00000368880	9606.ENSP00000264335	0	0	0	0	0	0.078	0.9	0.091	0.908
AMER1	GSK3B	4440074	4439717	9606.ENSP00000329117	9606.ENSP00000324806	0	0	0	0	0.061	0	0.9	0.104	0.908
PPP2R2A	WDR82	4439736	4437290	9606.ENSP00000325074	9606.ENSP00000296490	0	0	0	0	0.066	0	0.9	0.092	0.907
FZD4	TFRC	4449697	4442333	9606.ENSP00000434034	9606.ENSP00000353224	0	0	0	0	0	0	0.9	0.11	0.907
PPP2R2A	YWHAE	4439736	4435415	9606.ENSP00000325074	9606.ENSP00000264335	0	0	0	0	0.065	0.05	0.9	0.083	0.907
TCEB1	TRIM37	4451272	4435049	9606.ENSP00000478121	9606.ENSP00000262294	0	0	0	0	0	0	0.9	0.108	0.907
ASB13	UBE2K	4442033	4434874	9606.ENSP00000350331	9606.ENSP00000261427	0	0	0	0	0.063	0.088	0.9	0.044	0.907
PJA2	TRIM9	4442539	4437487	9606.ENSP00000354775	9606.ENSP00000298355	0	0	0	0	0.089	0	0.9	0.056	0.906
PLXNA2	PLXNA4	4442793	4442296	9606.ENSP00000356000	9606.ENSP00000352882	0	0	0	0.972	0.085	0	0.9	0.73	0.906
UBE2O	TRIM37	4439626	4435049	9606.ENSP00000323687	9606.ENSP00000262294	0	0	0	0	0.061	0.084	0.9	0	0.906
HDAC4	NUP133	4435457	4434869	9606.ENSP00000264606	9606.ENSP00000261396	0	0	0	0	0	0	0.9	0.095	0.905
ASB13	UBE2O	4442033	4439626	9606.ENSP00000350331	9606.ENSP00000323687	0	0	0	0	0	0.088	0.9	0.044	0.905
ASB13	TRIM37	4442033	4435049	9606.ENSP00000350331	9606.ENSP00000262294	0	0	0	0	0.057	0.079	0.9	0	0.905
CLASP2	TAOK1	4448905	4434933	9606.ENSP00000417518	9606.ENSP00000261716	0	0	0	0	0.095	0	0.9	0	0.905
TRIM9	UBE2K	4437487	4434874	9606.ENSP00000298355	9606.ENSP00000261427	0	0	0	0	0.061	0	0.9	0.062	0.904
PPP2R1B	LRP6	4438679	4434860	9606.ENSP00000311344	9606.ENSP00000261349	0	0	0	0	0	0	0.9	0.082	0.904
ANAPC1	UBE2O	4440924	4439626	9606.ENSP00000339109	9606.ENSP00000323687	0	0	0	0	0.057	0	0.9	0.055	0.903
TCEB1	UBE2O	4451272	4439626	9606.ENSP00000478121	9606.ENSP00000323687	0	0	0	0	0	0	0.9	0.073	0.903
TCEB1	CDK9	4451272	4444147	9606.ENSP00000478121	9606.ENSP00000362361	0	0	0	0	0.061	0	0.9	0.05	0.903
UBE2O	TRIM9	4439626	4437487	9606.ENSP00000323687	9606.ENSP00000298355	0	0	0	0	0	0	0.9	0.074	0.903
PPP2R1B	TAOK1	4438679	4434933	9606.ENSP00000311344	9606.ENSP00000261716	0	0	0	0	0.078	0	0.9	0	0.903
KAT6A	GATAD2B	4446616	4443143	9606.ENSP00000380136	9606.ENSP00000357644	0	0	0	0	0.061	0	0.9	0	0.902
TCEB1	AFF4	4451272	4435588	9606.ENSP00000478121	9606.ENSP00000265343	0	0	0	0	0	0	0.9	0.067	0.902
PJA2	TRIM37	4442539	4435049	9606.ENSP00000354775	9606.ENSP00000262294	0	0	0	0	0.062	0	0.9	0	0.902
AMER1	PPP2R1B	4440074	4438679	9606.ENSP00000329117	9606.ENSP00000311344	0	0	0	0	0.061	0	0.9	0	0.902
NEK7	NUP133	4442868	4434869	9606.ENSP00000356355	9606.ENSP00000261396	0	0	0	0	0.063	0	0.9	0.043	0.902
CLASP2	PPP2R1B	4448905	4438679	9606.ENSP00000417518	9606.ENSP00000311344	0	0	0	0	0.066	0	0.9	0	0.902
SEC24A	PPP6R3	4446864	4446190	9606.ENSP00000381823	9606.ENSP00000377390	0	0	0	0	0.064	0	0.9	0	0.902
CDK9	POU2F1	4444147	4442973	9606.ENSP00000362361	9606.ENSP00000356840	0	0	0	0	0.045	0	0.9	0.057	0.902
CLASP2	NUP133	4448905	4434869	9606.ENSP00000417518	9606.ENSP00000261396	0	0	0	0	0.066	0	0.9	0.043	0.902
KDM7A	QKI	4446699	4442608	9606.ENSP00000380692	9606.ENSP00000355094	0	0	0	0	0.061	0	0.9	0	0.902
TCEB1	PJA2	4451272	4442539	9606.ENSP00000478121	9606.ENSP00000354775	0	0	0	0	0.062	0	0.9	0.042	0.902
ASB13	TRIM9	4442033	4437487	9606.ENSP00000350331	9606.ENSP00000298355	0	0	0	0	0.062	0	0.9	0	0.902
CAMK2D	CACNG4	4440982	4435015	9606.ENSP00000339740	9606.ENSP00000262138	0	0	0	0	0.057	0	0.9	0.044	0.901
PJA2	ANAPC1	4442539	4440924	9606.ENSP00000354775	9606.ENSP00000339109	0	0	0	0	0	0	0.9	0	0.9
TMED10	KIF6	4437932	4436711	9606.ENSP00000303145	9606.ENSP00000287152	0	0	0	0	0	0	0.9	0	0.9
TCEB1	ANAPC1	4451272	4440924	9606.ENSP00000478121	9606.ENSP00000339109	0	0	0	0	0	0	0.9	0	0.9
FZD4	SYNJ2	4449697	4441760	9606.ENSP00000434034	9606.ENSP00000347792	0	0	0	0	0	0	0.9	0	0.9
ANAPC1	TRIM9	4440924	4437487	9606.ENSP00000339109	9606.ENSP00000298355	0	0	0	0	0	0	0.9	0	0.9
TAOK1	NUP133	4434933	4434869	9606.ENSP00000261716	9606.ENSP00000261396	0	0	0	0	0	0	0.9	0	0.9
KIF6	KDELR2	4436711	4434650	9606.ENSP00000287152	9606.ENSP00000258739	0	0	0	0	0	0	0.9	0.05	0.9
TCEB1	TRIM9	4451272	4437487	9606.ENSP00000478121	9606.ENSP00000298355	0	0	0	0	0	0	0.9	0	0.9
CWC25	CASC3	4451270	4435465	9606.ENSP00000478070	9606.ENSP00000264645	0	0	0	0	0	0	0.9	0	0.9
PPP2R2A	CASC3	4439736	4435465	9606.ENSP00000325074	9606.ENSP00000264645	0	0	0	0	0	0	0.9	0	0.9
CASC3	NUP133	4435465	4434869	9606.ENSP00000264645	9606.ENSP00000261396	0	0	0	0	0	0	0.9	0	0.9
ASB13	ANAPC1	4442033	4440924	9606.ENSP00000350331	9606.ENSP00000339109	0	0	0	0	0	0	0.9	0	0.9
FZD4	SH3KBP1	4449697	4446733	9606.ENSP00000434034	9606.ENSP00000380921	0	0	0	0	0	0	0.9	0	0.9
ATP8A1	MLEC	4445582	4433416	9606.ENSP00000371084	9606.ENSP00000228506	0	0	0	0	0	0	0.9	0	0.9
PJA2	ASB13	4442539	4442033	9606.ENSP00000354775	9606.ENSP00000350331	0	0	0	0	0	0	0.9	0.048	0.9
CWC25	ELAVL1	4451270	4447216	9606.ENSP00000478070	9606.ENSP00000385269	0	0	0	0	0	0	0.9	0	0.9
ELAVL1	CCND1	4447216	4433391	9606.ENSP00000385269	9606.ENSP00000227507	0	0	0	0	0.061	0	0.8	0.466	0.891
NUMB	INSC	4450355	4445231	9606.ENSP00000451300	9606.ENSP00000368872	0	0	0	0	0	0.715	0	0.624	0.888
STK40	TRIB1	4444116	4438757	9606.ENSP00000362222	9606.ENSP00000312150	0	0	0	0.695	0.06	0.864	0	0.5	0.886
PPP6C	PPP2R1B	4447729	4438679	9606.ENSP00000392147	9606.ENSP00000311344	0	0	0	0	0.083	0.306	0	0.802	0.863
CDK9	CCND1	4444147	4433391	9606.ENSP00000362361	9606.ENSP00000227507	0	0	0	0	0	0	0.72	0.447	0.838
FOXO1	GSK3B	4445233	4439717	9606.ENSP00000368880	9606.ENSP00000324806	0	0	0	0	0	0.542	0	0.659	0.837
PPP2R1B	RALA	4438679	4432558	9606.ENSP00000311344	9606.ENSP00000005257	0	0	0	0	0.062	0.253	0	0.756	0.814
SP1	CCND1	4440095	4433391	9606.ENSP00000329357	9606.ENSP00000227507	0	0	0	0	0	0.384	0	0.707	0.812
SLC6A6	NFAT5	4451536	4450573	9606.ENSP00000480890	9606.ENSP00000457593	0	0	0	0	0	0	0	0.802	0.802
GSK3B	MAP1B	4439717	4437332	9606.ENSP00000324806	9606.ENSP00000296755	0	0	0	0	0.062	0.472	0	0.631	0.801
MAP3K7	GSK3B	4443300	4439717	9606.ENSP00000358335	9606.ENSP00000324806	0	0	0	0.592	0.058	0.765	0	0.204	0.785
CLASP2	GSK3B	4448905	4439717	9606.ENSP00000417518	9606.ENSP00000324806	0	0	0	0	0.062	0.579	0	0.491	0.781
DYRK1A	FOXO1	4446873	4445233	9606.ENSP00000381932	9606.ENSP00000368880	0	0	0	0	0.063	0.393	0	0.635	0.774
FOXO1	CCND1	4445233	4433391	9606.ENSP00000368880	9606.ENSP00000227507	0	0	0	0	0	0	0	0.773	0.774
GRIN2A	CACNG4	4446563	4435015	9606.ENSP00000379818	9606.ENSP00000262138	0	0	0	0	0.086	0.162	0.72	0.06	0.771
KDM7A	H3F3B	4446699	4434387	9606.ENSP00000380692	9606.ENSP00000254810	0	0	0	0	0.052	0.726	0	0.174	0.766
BRCA1	CCND1	4448999	4433391	9606.ENSP00000418960	9606.ENSP00000227507	0	0	0	0	0.062	0.336	0	0.643	0.758
YLPM1	SMARCC1	4439688	4434360	9606.ENSP00000324463	9606.ENSP00000254480	0	0	0	0	0.063	0.752	0	0	0.758
PEX5	TRIM37	4447704	4435049	9606.ENSP00000391601	9606.ENSP00000262294	0	0	0	0	0	0	0	0.755	0.755
PPP3CA	FAM122A	4446333	4446255	9606.ENSP00000378323	9606.ENSP00000377807	0	0	0	0	0.045	0.738	0	0	0.739
PIP4K2B	SYNJ2	4451689	4441760	9606.ENSP00000482548	9606.ENSP00000347792	0	0	0	0	0.064	0.05	0.65	0.26	0.739
FOXO1	SLC2A4	4445233	4439402	9606.ENSP00000368880	9606.ENSP00000320935	0	0	0	0	0	0	0	0.736	0.736
QKI	RBFOX1	4442608	4438474	9606.ENSP00000355094	9606.ENSP00000309117	0	0	0	0	0.089	0.307	0	0.612	0.734
VAPB	SOD1	4448871	4435927	9606.ENSP00000417175	9606.ENSP00000270142	0	0	0	0	0	0.173	0	0.688	0.731
NCOA6	WDR82	4444453	4437290	9606.ENSP00000363929	9606.ENSP00000296490	0	0	0	0	0	0	0	0.728	0.728
ELAVL1	QKI	4447216	4442608	9606.ENSP00000385269	9606.ENSP00000355094	0	0	0	0	0.061	0.264	0	0.635	0.726
KAT6A	EPC2	4446616	4434638	9606.ENSP00000380136	9606.ENSP00000258484	0	0	0	0	0.112	0.56	0	0.353	0.725
PPP3CA	ANAPC1	4446333	4440924	9606.ENSP00000378323	9606.ENSP00000339109	0	0	0	0	0.059	0.186	0.6	0.195	0.72
CTNND2	FAM134B	4438289	4438064	9606.ENSP00000307134	9606.ENSP00000304642	0	0	0	0	0.069	0	0	0.71	0.718
CAMK2D	CACNB2	4440982	4439325	9606.ENSP00000339740	9606.ENSP00000320025	0	0	0	0	0.063	0	0.6	0.286	0.709
PURB	NUFIP2	4446441	4433312	9606.ENSP00000379051	9606.ENSP00000225388	0	0	0	0	0.077	0	0	0.692	0.704
GRIN2A	SLC1A2	4446563	4436284	9606.ENSP00000379818	9606.ENSP00000278379	0	0	0	0	0.215	0.109	0	0.61	0.703
PTPN1	GSK3B	4443784	4439717	9606.ENSP00000360683	9606.ENSP00000324806	0	0	0	0	0.062	0.456	0	0.454	0.697
ELAVL1	IGF2BP1	4447216	4436856	9606.ENSP00000385269	9606.ENSP00000290341	0	0	0	0	0.05	0.31	0	0.57	0.694
PPP1R2	PPP3CA	4451862	4446333	9606.ENSP00000484580	9606.ENSP00000378323	0	0	0	0	0.055	0.304	0.54	0.083	0.685
PPP6C	PPP2R2A	4447729	4439736	9606.ENSP00000392147	9606.ENSP00000325074	0	0	0	0	0.133	0.19	0	0.578	0.678
SLC1A2	SOD1	4436284	4435927	9606.ENSP00000278379	9606.ENSP00000270142	0	0	0	0	0	0	0	0.677	0.677
SEC24A	ANKRD40	4446864	4436624	9606.ENSP00000381823	9606.ENSP00000285243	0	0	0	0	0.46	0.157	0	0.342	0.674
PPP6C	ANKRD52	4447729	4435745	9606.ENSP00000392147	9606.ENSP00000267116	0	0	0	0	0.062	0.419	0	0.446	0.671
RIMS3	ANKRD40	4443998	4436624	9606.ENSP00000361769	9606.ENSP00000285243	0	0	0	0	0	0	0	0.666	0.666
ELOVL4	CERS3	4443401	4436583	9606.ENSP00000358831	9606.ENSP00000284382	0	0	0	0	0.064	0.057	0	0.652	0.666
DPYSL2	MAP1B	4438513	4437332	9606.ENSP00000309539	9606.ENSP00000296755	0	0	0	0	0.229	0	0	0.581	0.664
PPP1R2	PPP2R2A	4451862	4439736	9606.ENSP00000484580	9606.ENSP00000325074	0	0	0	0	0	0	0.54	0.299	0.663
DTNA	STX12	4450946	4444293	9606.ENSP00000470152	9606.ENSP00000363054	0	0	0	0	0	0	0	0.661	0.661
KDM7A	WDR82	4446699	4437290	9606.ENSP00000380692	9606.ENSP00000296490	0	0	0	0	0.064	0.378	0	0.452	0.653
SP1	PTGER4	4440095	4437902	9606.ENSP00000329357	9606.ENSP00000302846	0	0	0	0	0	0.384	0	0.454	0.65
NFAT5	SLC5A3	4450573	4445507	9606.ENSP00000457593	9606.ENSP00000370543	0	0	0	0	0	0	0	0.648	0.648
DYRK1A	GRIN2A	4446873	4446563	9606.ENSP00000381932	9606.ENSP00000379818	0	0	0	0	0	0	0	0.648	0.648
INSC	FAM8A1	4445231	4434740	9606.ENSP00000368872	9606.ENSP00000259963	0	0	0	0	0	0	0	0.644	0.644
PKHD1	PLXNA4	4443672	4442296	9606.ENSP00000360158	9606.ENSP00000352882	0	0	0	0	0	0	0	0.643	0.643
DYRK1A	CCND1	4446873	4433391	9606.ENSP00000381932	9606.ENSP00000227507	0	0	0	0	0	0	0	0.641	0.642
BMPER	RALA	4437374	4432558	9606.ENSP00000297161	9606.ENSP00000005257	0	0	0	0	0	0	0	0.64	0.64
PKHD1	PLXNA2	4443672	4442793	9606.ENSP00000360158	9606.ENSP00000356000	0	0	0	0	0	0	0	0.64	0.64
SATB2	GLS	4448158	4439125	9606.ENSP00000401112	9606.ENSP00000317379	0	0	0	0	0	0	0	0.64	0.64
KDM7A	JARID2	4446699	4441136	9606.ENSP00000380692	9606.ENSP00000341280	0	0	0	0	0.086	0.262	0	0.508	0.639
JARID2	CCND1	4441136	4433391	9606.ENSP00000341280	9606.ENSP00000227507	0	0	0	0	0	0	0	0.637	0.637
PPP1R2	GSK3B	4451862	4439717	9606.ENSP00000484580	9606.ENSP00000324806	0	0	0	0	0.063	0.574	0	0.159	0.635
GRM4	GRIN2A	4449953	4446563	9606.ENSP00000440556	9606.ENSP00000379818	0	0	0	0	0.16	0.081	0	0.563	0.634
BRCA1	CCAR2	4448999	4438620	9606.ENSP00000418960	9606.ENSP00000310670	0	0	0	0	0.063	0.379	0	0.419	0.632
SH3KBP1	PDGFRA	4446733	4434540	9606.ENSP00000380921	9606.ENSP00000257290	0	0	0	0	0.061	0.082	0.6	0.047	0.627
PPP6C	STK40	4447729	4444116	9606.ENSP00000392147	9606.ENSP00000362222	0	0	0	0	0.062	0.374	0	0.412	0.625
JAZF1	YWHAE	4436559	4435415	9606.ENSP00000283928	9606.ENSP00000264335	0	0	0	0	0.061	0.102	0	0.59	0.624
NFAT5	DYRK1A	4450573	4446873	9606.ENSP00000457593	9606.ENSP00000381932	0	0	0	0	0.062	0	0	0.611	0.619
ZNF81	PHF6	4444800	4440072	9606.ENSP00000366153	9606.ENSP00000329097	0	0	0	0	0.062	0.144	0	0.563	0.619
LRP6	CCND1	4434860	4433391	9606.ENSP00000261349	9606.ENSP00000227507	0	0	0	0	0.088	0	0	0.598	0.617
PPP2R2A	CACNB2	4439736	4439325	9606.ENSP00000325074	9606.ENSP00000320025	0	0	0	0	0.061	0	0.6	0.048	0.611
PPP2R2A	CACNG4	4439736	4435015	9606.ENSP00000325074	9606.ENSP00000262138	0	0	0	0	0.062	0	0.6	0	0.608
CACNB2	PPP2R1B	4439325	4438679	9606.ENSP00000320025	9606.ENSP00000311344	0	0	0	0	0.062	0	0.6	0	0.608
BRCA1	UBE2K	4448999	4434874	9606.ENSP00000418960	9606.ENSP00000261427	0	0	0	0	0.049	0.421	0	0.342	0.606
PPP2R1B	CACNG4	4438679	4435015	9606.ENSP00000311344	9606.ENSP00000262138	0	0	0	0	0.055	0	0.6	0	0.605
SLC6A6	SLC39A10	4451536	4447420	9606.ENSP00000480890	9606.ENSP00000386766	0.043	0	0	0	0	0	0	0.603	0.604
SATB2	RELN	4448158	4447749	9606.ENSP00000401112	9606.ENSP00000392423	0	0	0	0	0	0	0	0.599	0.599
DYRK1A	MEF2D	4446873	4435982	9606.ENSP00000381932	9606.ENSP00000271555	0	0	0	0	0.061	0.185	0	0.514	0.596
ATL2	RBFOX1	4445137	4438474	9606.ENSP00000368237	9606.ENSP00000309117	0	0	0	0	0.055	0	0	0.589	0.595
PTPN1	SLC2A4	4443784	4439402	9606.ENSP00000360683	9606.ENSP00000320935	0	0	0	0	0	0.051	0	0.585	0.59
PLXNA2	CTNND2	4442793	4438289	9606.ENSP00000356000	9606.ENSP00000307134	0	0	0	0	0.127	0	0	0.542	0.583
SP1	HDAC4	4440095	4435457	9606.ENSP00000329357	9606.ENSP00000264606	0	0	0	0	0	0.449	0	0.27	0.581
SDC4	KDELR2	4444011	4434650	9606.ENSP00000361818	9606.ENSP00000258739	0	0	0	0	0.07	0	0	0.567	0.58
IPO7	KPNA4	4445263	4440555	9606.ENSP00000369042	9606.ENSP00000334373	0	0	0	0	0.165	0	0	0.516	0.579
GRIN2A	GLRA2	4446563	4433041	9606.ENSP00000379818	9606.ENSP00000218075	0	0	0	0	0.124	0	0	0.538	0.578
NUMB	YWHAE	4450355	4435415	9606.ENSP00000451300	9606.ENSP00000264335	0	0	0	0	0	0.567	0	0.064	0.577
SLMO2	TRAM2	4441809	4432738	9606.ENSP00000348206	9606.ENSP00000182527	0	0	0	0	0	0	0	0.576	0.576
BRCA1	SP1	4448999	4440095	9606.ENSP00000418960	9606.ENSP00000329357	0	0	0	0	0.061	0.379	0	0.328	0.573
ELAVL1	FOXO1	4447216	4445233	9606.ENSP00000385269	9606.ENSP00000368880	0	0	0	0	0	0	0	0.571	0.571
SOX11	CCND1	4439535	4433391	9606.ENSP00000322568	9606.ENSP00000227507	0	0	0	0	0.109	0	0	0.537	0.569
PDGFRA	H3F3B	4434540	4434387	9606.ENSP00000257290	9606.ENSP00000254810	0	0	0	0	0	0.114	0	0.531	0.567
FOXO1	HDAC4	4445233	4435457	9606.ENSP00000368880	9606.ENSP00000264606	0	0	0	0	0	0.299	0	0.405	0.565
MAP3K7	TAOK1	4443300	4434933	9606.ENSP00000358335	9606.ENSP00000261716	0	0	0	0.582	0	0.31	0	0.889	0.565
QKI	IGF2BP1	4442608	4436856	9606.ENSP00000355094	9606.ENSP00000290341	0	0	0	0	0.062	0.25	0	0.43	0.564
PIP4K2B	LASP1	4451689	4439747	9606.ENSP00000482548	9606.ENSP00000325240	0	0	0	0	0	0	0	0.562	0.562
CCND1	RALA	4433391	4432558	9606.ENSP00000227507	9606.ENSP00000005257	0	0	0	0	0	0.456	0	0.223	0.559
TRIM37	H3F3B	4435049	4434387	9606.ENSP00000262294	9606.ENSP00000254810	0	0	0	0	0	0.187	0	0.478	0.558
QKI	NWD2	4442608	4438507	9606.ENSP00000355094	9606.ENSP00000309501	0	0	0	0	0.061	0	0	0.545	0.555
RBFOX1	CTNND2	4438474	4438289	9606.ENSP00000309117	9606.ENSP00000307134	0	0	0	0	0.349	0	0	0.338	0.551
KAT6A	HDAC4	4446616	4435457	9606.ENSP00000380136	9606.ENSP00000264606	0	0	0	0	0.063	0.186	0	0.455	0.548
PURB	MBD2	4446441	4434481	9606.ENSP00000379051	9606.ENSP00000256429	0	0	0	0	0	0.548	0	0	0.548
JAZF1	UHRF1BP1	4436559	4432751	9606.ENSP00000283928	9606.ENSP00000192788	0	0	0	0	0	0	0	0.546	0.546
MAP3K7	EPC2	4443300	4434638	9606.ENSP00000358335	9606.ENSP00000258484	0	0	0	0	0.053	0	0.54	0	0.545
PPP1R2	WDR82	4451862	4437290	9606.ENSP00000484580	9606.ENSP00000296490	0	0	0	0	0.053	0	0.54	0	0.545
NR4A3	TMF1	4451630	4446829	9606.ENSP00000482027	9606.ENSP00000381567	0	0	0	0	0	0	0	0.544	0.544
GGNBP2	CCND1	4451276	4433391	9606.ENSP00000478220	9606.ENSP00000227507	0	0	0	0	0	0	0	0.542	0.542
TFRC	SLC2A4	4442333	4439402	9606.ENSP00000353224	9606.ENSP00000320935	0	0	0	0	0.064	0	0	0.531	0.542
SLC6A6	SLC5A3	4451536	4445507	9606.ENSP00000480890	9606.ENSP00000370543	0	0	0	0	0	0	0	0.54	0.54
C11orf87	CACNB2	4440274	4439325	9606.ENSP00000331581	9606.ENSP00000320025	0	0	0	0	0	0	0	0.539	0.539
CCNJL	HLF	4446211	4433352	9606.ENSP00000377547	9606.ENSP00000226067	0	0	0	0	0	0	0	0.537	0.537
PPP2R2A	CCAR2	4439736	4438620	9606.ENSP00000325074	9606.ENSP00000310670	0	0	0	0	0	0.522	0	0.073	0.537
IPO7	NUP133	4445263	4434869	9606.ENSP00000369042	9606.ENSP00000261396	0	0	0	0	0.077	0.05	0	0.514	0.537
GRM4	MAP1B	4449953	4437332	9606.ENSP00000440556	9606.ENSP00000296755	0	0	0	0	0.122	0	0	0.493	0.536
HDAC4	MBD2	4435457	4434481	9606.ENSP00000264606	9606.ENSP00000256429	0	0	0	0	0	0.128	0.36	0.235	0.535
VTI1A	VPS26B	4446102	4436420	9606.ENSP00000376792	9606.ENSP00000281187	0	0	0	0	0.111	0.064	0	0.485	0.534
CTNND2	TMOD2	4438289	4434104	9606.ENSP00000307134	9606.ENSP00000249700	0	0	0	0	0.119	0	0	0.492	0.533
FAM122A	PPP2R2A	4446255	4439736	9606.ENSP00000377807	9606.ENSP00000325074	0	0	0	0	0	0.532	0	0	0.532
MAP3K1	DYRK1A	4446923	4446873	9606.ENSP00000382423	9606.ENSP00000381932	0	0	0	0.545	0.116	0.441	0	0.232	0.532
SATB2	HDAC4	4448158	4435457	9606.ENSP00000401112	9606.ENSP00000264606	0	0	0	0	0	0.07	0.36	0.275	0.53
GSK3B	SOD1	4439717	4435927	9606.ENSP00000324806	9606.ENSP00000270142	0	0	0	0	0	0.085	0	0.508	0.53
MAP3K1	GSK3B	4446923	4439717	9606.ENSP00000382423	9606.ENSP00000324806	0	0	0	0.626	0.087	0.432	0	0.371	0.529
PPP6C	ASB13	4447729	4442033	9606.ENSP00000392147	9606.ENSP00000350331	0	0	0	0	0.062	0.171	0	0.44	0.526
PRPF4B	AFF4	4440770	4435588	9606.ENSP00000337194	9606.ENSP00000265343	0	0	0	0	0.063	0	0	0.515	0.526
ZFPM2	SHE	4447082	4438319	9606.ENSP00000384179	9606.ENSP00000307369	0	0	0	0	0	0	0	0.525	0.525
TMF1	UHRF1BP1	4446829	4432751	9606.ENSP00000381567	9606.ENSP00000192788	0	0	0	0	0	0	0	0.52	0.52
ATF6	SP1	4442990	4440095	9606.ENSP00000356919	9606.ENSP00000329357	0	0	0	0	0	0.379	0	0.258	0.519
HIPK2	MAP3K1	4447246	4446923	9606.ENSP00000385571	9606.ENSP00000382423	0	0	0	0.54	0.116	0.441	0	0.169	0.517
API5	RHBDL3	4449587	4435859	9606.ENSP00000431391	9606.ENSP00000269051	0	0	0	0	0	0	0	0.517	0.517
PPP6C	MAP3K7	4447729	4443300	9606.ENSP00000392147	9606.ENSP00000358335	0	0	0	0	0	0.454	0	0.144	0.512
KHDRBS3	RBFOX1	4441800	4438474	9606.ENSP00000348108	9606.ENSP00000309117	0	0	0	0	0.107	0.18	0	0.386	0.512
GRIN2A	KCNA1	4446563	4445701	9606.ENSP00000379818	9606.ENSP00000371985	0	0	0	0	0.31	0	0	0.322	0.512
JMJD6	KDM7A	4447835	4446699	9606.ENSP00000394085	9606.ENSP00000380692	0	0	0	0	0	0	0	0.512	0.512
KIAA0319L	JAZF1	4439202	4436559	9606.ENSP00000318406	9606.ENSP00000283928	0	0	0	0	0	0	0	0.511	0.511
STX12	VPS26B	4444293	4436420	9606.ENSP00000363054	9606.ENSP00000281187	0	0	0	0	0.111	0.063	0	0.457	0.509
GRM4	SLC1A2	4449953	4436284	9606.ENSP00000440556	9606.ENSP00000278379	0	0	0	0	0.169	0	0	0.433	0.509
ELAVL1	RBFOX1	4447216	4438474	9606.ENSP00000385269	9606.ENSP00000309117	0	0	0	0	0.061	0	0	0.496	0.507
CLCN3	CCND1	4434892	4433391	9606.ENSP00000261514	9606.ENSP00000227507	0	0	0	0	0	0	0	0.507	0.507
SLC1A2	GABBR2	4436284	4434703	9606.ENSP00000278379	9606.ENSP00000259455	0	0	0	0	0.23	0	0	0.387	0.507
GRIN2A	RBFOX1	4446563	4438474	9606.ENSP00000379818	9606.ENSP00000309117	0	0	0	0	0.339	0	0	0.284	0.506
NR4A3	CCND1	4451630	4433391	9606.ENSP00000482027	9606.ENSP00000227507	0	0	0	0	0	0	0	0.505	0.505
FOXO1	CYP7B1	4445233	4438625	9606.ENSP00000368880	9606.ENSP00000310721	0	0	0	0	0	0.263	0	0.355	0.504
WDR82	DAZAP1	4437290	4433576	9606.ENSP00000296490	9606.ENSP00000233078	0	0	0	0	0.103	0.446	0	0.082	0.504
PPP6R3	ANKRD52	4446190	4435745	9606.ENSP00000377390	9606.ENSP00000267116	0	0	0	0	0.061	0.166	0	0.415	0.502
MAP3K1	YWHAE	4446923	4435415	9606.ENSP00000382423	9606.ENSP00000264335	0	0	0	0	0	0.403	0	0.2	0.502
LASP1	RASA1	4439747	4436131	9606.ENSP00000325240	9606.ENSP00000274376	0	0	0	0	0	0	0	0.5	0.5
PHF2	JARID2	4442224	4441136	9606.ENSP00000352185	9606.ENSP00000341280	0	0	0	0	0.063	0.132	0	0.434	0.5
BRCA1	MAP3K1	4448999	4446923	9606.ENSP00000418960	9606.ENSP00000382423	0	0	0	0	0.061	0	0	0.49	0.5
JMJD6	CDK9	4447835	4444147	9606.ENSP00000394085	9606.ENSP00000362361	0	0	0	0	0.063	0.373	0	0.215	0.498
FOXO1	PTPN1	4445233	4443784	9606.ENSP00000368880	9606.ENSP00000360683	0	0	0	0	0	0.079	0	0.477	0.498
PURB	EIF4EBP2	4446441	4444135	9606.ENSP00000379051	9606.ENSP00000362314	0	0	0	0	0.062	0	0	0.487	0.498
KDM7A	ZNF81	4446699	4444800	9606.ENSP00000380692	9606.ENSP00000366153	0	0	0	0	0	0.136	0	0.441	0.496
SP1	SMARCC1	4440095	4434360	9606.ENSP00000329357	9606.ENSP00000254480	0	0	0	0	0.082	0.422	0	0.125	0.495
PPP3CA	GSK3B	4446333	4439717	9606.ENSP00000378323	9606.ENSP00000324806	0	0	0	0	0.081	0.28	0	0.291	0.491
FOXO1	HOXA5	4445233	4433249	9606.ENSP00000368880	9606.ENSP00000222726	0	0	0	0	0	0.424	0	0.152	0.491
BRCA1	SMARCC1	4448999	4434360	9606.ENSP00000418960	9606.ENSP00000254480	0	0	0	0	0.096	0.305	0	0.254	0.49
GSK3B	SLC2A4	4439717	4439402	9606.ENSP00000324806	9606.ENSP00000320935	0	0	0	0	0	0.127	0	0.437	0.488
GSK3B	HDAC4	4439717	4435457	9606.ENSP00000324806	9606.ENSP00000264606	0	0	0	0	0.063	0.407	0	0.153	0.488
DYRK1A	YWHAE	4446873	4435415	9606.ENSP00000381932	9606.ENSP00000264335	0	0	0	0	0	0.452	0	0.104	0.488
MEF2D	DAZAP1	4435982	4433576	9606.ENSP00000271555	9606.ENSP00000233078	0	0	0	0	0.059	0.05	0	0.473	0.487
PPP3CA	PPP2R1B	4446333	4438679	9606.ENSP00000378323	9606.ENSP00000311344	0	0	0	0	0.083	0.296	0	0.266	0.485
ELAVL1	MAP1B	4447216	4437332	9606.ENSP00000385269	9606.ENSP00000296755	0	0	0	0	0.064	0	0	0.471	0.484
JMJD6	JARID2	4447835	4441136	9606.ENSP00000394085	9606.ENSP00000341280	0	0	0	0	0	0	0	0.483	0.483
RELN	SP1	4447749	4440095	9606.ENSP00000392423	9606.ENSP00000329357	0	0	0	0	0	0	0	0.483	0.483
ELAVL1	DCP2	4447216	4445826	9606.ENSP00000385269	9606.ENSP00000373715	0	0	0	0	0	0	0	0.481	0.481
TMF1	WDR82	4446829	4437290	9606.ENSP00000381567	9606.ENSP00000296490	0	0	0	0	0.052	0	0	0.472	0.478
PHF6	IDE	4440072	4435672	9606.ENSP00000329097	9606.ENSP00000265986	0	0	0	0	0.106	0	0	0.438	0.476
RAB14	TMED10	4444272	4437932	9606.ENSP00000362946	9606.ENSP00000303145	0	0	0	0	0.195	0.1	0	0.33	0.473
SH2D1A	GSK3B	4443678	4439717	9606.ENSP00000360181	9606.ENSP00000324806	0	0	0	0	0.061	0.185	0	0.364	0.47
KLF13	CCND1	4437855	4433391	9606.ENSP00000302456	9606.ENSP00000227507	0	0	0	0	0	0.05	0	0.464	0.469
RNF144A	TRIM9	4439431	4437487	9606.ENSP00000321330	9606.ENSP00000298355	0	0	0	0	0.097	0	0	0.435	0.468
NCOA6	POU2F1	4444453	4442973	9606.ENSP00000363929	9606.ENSP00000356840	0	0	0	0	0	0	0	0.468	0.468
HIPK2	DYRK1A	4447246	4446873	9606.ENSP00000385571	9606.ENSP00000381932	0	0	0	0.683	0.077	0.336	0	0.538	0.465
ITM2B	KLF9	4445077	4444833	9606.ENSP00000367828	9606.ENSP00000366330	0	0	0	0	0.069	0	0	0.449	0.465
SLC24A3	KIF6	4440460	4436711	9606.ENSP00000333519	9606.ENSP00000287152	0	0	0	0	0.062	0	0	0.453	0.465
CAMK2D	HDAC4	4440982	4435457	9606.ENSP00000339740	9606.ENSP00000264606	0	0	0	0	0.057	0.379	0	0.161	0.465
PPP1R2	PPP6C	4451862	4447729	9606.ENSP00000484580	9606.ENSP00000392147	0	0	0	0	0.053	0.304	0	0.248	0.461
KCNA1	TFRC	4445701	4442333	9606.ENSP00000371985	9606.ENSP00000353224	0	0	0	0	0	0.086	0	0.433	0.459
PARS2	TRMT1L	4443717	4442901	9606.ENSP00000360327	9606.ENSP00000356476	0	0	0	0	0.064	0	0	0.446	0.459
VWA8	DDX28	4445190	4440349	9606.ENSP00000368612	9606.ENSP00000332340	0	0	0	0	0.146	0.052	0	0.384	0.458
VGLL3	LBH	4446809	4446395	9606.ENSP00000381436	9606.ENSP00000378733	0	0	0	0	0	0	0	0.458	0.458
TMF1	TM9SF3	4446829	4443680	9606.ENSP00000381567	9606.ENSP00000360184	0	0	0	0	0	0	0	0.458	0.458
ATF6	CTNND2	4442990	4438289	9606.ENSP00000356919	9606.ENSP00000307134	0	0	0	0	0.453	0	0	0.049	0.457
TMED10	LRRC59	4437932	4433348	9606.ENSP00000303145	9606.ENSP00000225972	0	0	0	0	0.061	0	0	0.445	0.456
PPP1R2	PPP1R9A	4451862	4448365	9606.ENSP00000484580	9606.ENSP00000405514	0	0	0	0	0.108	0.379	0	0.095	0.454
NR3C2	RHBDL3	4442077	4435859	9606.ENSP00000350815	9606.ENSP00000269051	0	0	0	0	0	0.054	0	0.445	0.453
SLC16A2	ARX	4450784	4445153	9606.ENSP00000465734	9606.ENSP00000368332	0	0	0	0	0.078	0	0	0.431	0.452
JARID2	H3F3B	4441136	4434387	9606.ENSP00000341280	9606.ENSP00000254810	0	0	0	0	0	0.302	0	0.246	0.451
TCEB1	ZSWIM6	4451272	4434251	9606.ENSP00000478121	9606.ENSP00000252744	0	0	0	0	0	0.371	0	0.162	0.45
PPP2R2A	DPYSL2	4439736	4438513	9606.ENSP00000325074	9606.ENSP00000309539	0	0	0	0	0	0	0	0.449	0.449
KCNA1	RBFOX1	4445701	4438474	9606.ENSP00000371985	9606.ENSP00000309117	0	0	0	0	0.399	0	0	0.12	0.448
FOXO1	QKI	4445233	4442608	9606.ENSP00000368880	9606.ENSP00000355094	0	0	0	0	0	0	0	0.447	0.447
PDGFRA	CCND1	4434540	4433391	9606.ENSP00000257290	9606.ENSP00000227507	0	0	0	0	0.051	0	0	0.44	0.445
HTRA1	SOD1	4443236	4435927	9606.ENSP00000357980	9606.ENSP00000270142	0	0	0	0	0	0	0	0.445	0.445
SATB2	PAX9	4448158	4442637	9606.ENSP00000401112	9606.ENSP00000355245	0	0	0	0	0	0	0	0.444	0.444
DPYSL2	YWHAE	4438513	4435415	9606.ENSP00000309539	9606.ENSP00000264335	0	0	0	0	0.089	0.055	0	0.405	0.443
PPP2R1B	STRIP2	4438679	4434092	9606.ENSP00000311344	9606.ENSP00000249344	0	0	0	0	0	0.262	0	0.275	0.442
PRPF4B	KLF13	4440770	4437855	9606.ENSP00000337194	9606.ENSP00000302456	0	0	0	0	0.061	0.397	0	0.093	0.441
MAP3K7	YWHAE	4443300	4435415	9606.ENSP00000358335	9606.ENSP00000264335	0	0	0	0	0.062	0.26	0	0.26	0.441
LASP1	PPP2R2A	4439747	4439736	9606.ENSP00000325240	9606.ENSP00000325074	0	0	0	0	0	0	0	0.44	0.44
TRMT1L	DDX28	4442901	4440349	9606.ENSP00000356476	9606.ENSP00000332340	0.053	0	0	0	0.376	0.129	0	0	0.44
ACSL4	ACSS1	4440986	4439093	9606.ENSP00000339787	9606.ENSP00000316924	0	0	0	0	0.085	0	0	0.411	0.438
KDM7A	PHF6	4446699	4440072	9606.ENSP00000380692	9606.ENSP00000329097	0	0	0	0	0.063	0.356	0	0.141	0.436
PPP1R2	KDM7A	4451862	4446699	9606.ENSP00000484580	9606.ENSP00000380692	0	0	0	0	0	0	0	0.435	0.435
GSK3B	CTNND2	4439717	4438289	9606.ENSP00000324806	9606.ENSP00000307134	0	0	0	0	0.062	0.344	0	0.156	0.435
PPP1R2	TSN	4451862	4445875	9606.ENSP00000484580	9606.ENSP00000374332	0	0	0	0	0.047	0	0	0.431	0.435
SLC6A6	GLRA2	4451536	4433041	9606.ENSP00000480890	9606.ENSP00000218075	0	0	0	0	0.064	0	0	0.42	0.433
PPP3CA	CAMK2D	4446333	4440982	9606.ENSP00000378323	9606.ENSP00000339740	0	0	0	0	0.108	0	0	0.389	0.432
CDC40	QKI	4443232	4442608	9606.ENSP00000357928	9606.ENSP00000355094	0	0	0	0	0.08	0.371	0	0.092	0.429
TM9SF3	PJA2	4443680	4442539	9606.ENSP00000360184	9606.ENSP00000354775	0	0	0	0	0.427	0	0	0	0.427
FAM134B	NAA15	4438064	4437304	9606.ENSP00000304642	9606.ENSP00000296543	0	0	0	0	0	0	0	0.426	0.426
PRPF4B	KIAA0319L	4440770	4439202	9606.ENSP00000337194	9606.ENSP00000318406	0	0	0	0	0	0	0	0.426	0.426
NUMB	ATP8A1	4450355	4445582	9606.ENSP00000451300	9606.ENSP00000371084	0	0	0	0	0	0.377	0	0.115	0.425
KLF9	PAX9	4444833	4442637	9606.ENSP00000366330	9606.ENSP00000355245	0	0	0	0	0	0	0	0.423	0.423
KAT6A	HOXA5	4446616	4433249	9606.ENSP00000380136	9606.ENSP00000222726	0	0	0	0	0	0.354	0	0.143	0.422
API5	VAPB	4449587	4448871	9606.ENSP00000431391	9606.ENSP00000417175	0	0	0	0	0	0	0	0.422	0.422
BRCA1	PDGFRA	4448999	4434540	9606.ENSP00000418960	9606.ENSP00000257290	0	0	0	0	0	0.177	0	0.327	0.422
SP1	MEF2D	4440095	4435982	9606.ENSP00000329357	9606.ENSP00000271555	0	0	0	0	0.065	0.406	0	0.041	0.422
PHF6	TAL1	4440072	4437068	9606.ENSP00000329097	9606.ENSP00000294339	0	0	0	0	0	0	0	0.421	0.42
RAPH1	TRIM9	4439065	4437487	9606.ENSP00000316543	9606.ENSP00000298355	0	0	0	0	0.061	0.185	0	0.301	0.418
CDC40	KHDRBS3	4443232	4441800	9606.ENSP00000357928	9606.ENSP00000348108	0	0	0	0	0.064	0.371	0	0.092	0.418
SLC16A2	SLC1A2	4450784	4436284	9606.ENSP00000465734	9606.ENSP00000278379	0	0	0	0	0.071	0	0	0.399	0.418
PHF6	WDR82	4440072	4437290	9606.ENSP00000329097	9606.ENSP00000296490	0	0	0	0	0.201	0.26	0	0.096	0.418
KAT6A	SMARCC1	4446616	4434360	9606.ENSP00000380136	9606.ENSP00000254480	0	0	0	0	0.099	0.188	0	0.268	0.418
JMJD6	PHF2	4447835	4442224	9606.ENSP00000394085	9606.ENSP00000352185	0	0	0	0	0.053	0	0	0.408	0.416
GRIN2A	GABBR2	4446563	4434703	9606.ENSP00000379818	9606.ENSP00000259455	0	0	0	0	0.197	0	0	0.302	0.416
KLF9	SP1	4444833	4440095	9606.ENSP00000366330	9606.ENSP00000329357	0	0	0	0.831	0	0.379	0	0.381	0.416
PPP3CA	RHBDL3	4446333	4435859	9606.ENSP00000378323	9606.ENSP00000269051	0.052	0	0	0	0.064	0.333	0	0.129	0.415
NUP133	STRIP2	4434869	4434092	9606.ENSP00000261396	9606.ENSP00000249344	0	0	0	0	0	0	0	0.414	0.414
SLC2A4	MEF2D	4439402	4435982	9606.ENSP00000320935	9606.ENSP00000271555	0	0	0	0	0	0	0	0.414	0.414
GRIN2A	CACNB2	4446563	4439325	9606.ENSP00000379818	9606.ENSP00000320025	0	0	0	0	0.076	0	0	0.391	0.413
PPP6C	ANAPC1	4447729	4440924	9606.ENSP00000392147	9606.ENSP00000339109	0	0	0	0	0	0.186	0	0.308	0.412
CWC25	TAOK1	4451270	4434933	9606.ENSP00000478070	9606.ENSP00000261716	0	0	0	0	0.062	0	0	0.398	0.411
HBEGF	CCND1	4433516	4433391	9606.ENSP00000230990	9606.ENSP00000227507	0	0	0	0	0.061	0	0	0.398	0.41
TMEM161B	QKI	4449360	4442608	9606.ENSP00000426354	9606.ENSP00000355094	0	0	0	0	0.062	0.052	0	0.39	0.41
LASP1	CACNB2	4439747	4439325	9606.ENSP00000325240	9606.ENSP00000320025	0	0	0	0	0	0	0	0.409	0.409
SATB2	ZFPM2	4448158	4447082	9606.ENSP00000401112	9606.ENSP00000384179	0	0	0	0	0	0.081	0	0.384	0.409
PIP4K2B	CWC25	4451689	4451270	9606.ENSP00000482548	9606.ENSP00000478070	0	0	0	0	0	0	0	0.408	0.408
ELFN2	TRAM2	4447217	4432738	9606.ENSP00000385277	9606.ENSP00000182527	0	0	0	0	0.057	0	0	0.398	0.408
AKAP7	TRIM37	4448355	4435049	9606.ENSP00000405252	9606.ENSP00000262294	0	0	0	0	0	0	0	0.408	0.408
ATF6	SOD1	4442990	4435927	9606.ENSP00000356919	9606.ENSP00000270142	0	0	0	0	0	0	0	0.408	0.408
PPP6C	GSK3B	4447729	4439717	9606.ENSP00000392147	9606.ENSP00000324806	0	0	0	0	0.082	0.261	0	0.197	0.407
NAA15	RSBN1	4437304	4434879	9606.ENSP00000296543	9606.ENSP00000261441	0	0	0	0	0.062	0	0	0.392	0.406
IPO7	PHF2	4445263	4442224	9606.ENSP00000369042	9606.ENSP00000352185	0	0	0	0	0.063	0.054	0	0.384	0.406
NKAIN2	RBFOX1	4443098	4438474	9606.ENSP00000357402	9606.ENSP00000309117	0	0	0	0	0.358	0	0	0.111	0.405
PPP3CA	SDC4	4446333	4444011	9606.ENSP00000378323	9606.ENSP00000361818	0	0	0	0	0	0	0	0.405	0.405
DYRK1A	SOD1	4446873	4435927	9606.ENSP00000381932	9606.ENSP00000270142	0	0	0	0	0	0	0	0.404	0.404
PRLR	JARID2	4451730	4441136	9606.ENSP00000482954	9606.ENSP00000341280	0	0	0	0	0	0	0	0.403	0.403
TMED10	ANKRD40	4437932	4436624	9606.ENSP00000303145	9606.ENSP00000285243	0	0	0	0	0.142	0.125	0	0.269	0.403
GRM4	CCND1	4449953	4433391	9606.ENSP00000440556	9606.ENSP00000227507	0	0	0	0	0	0	0	0.403	0.403
PPP6C	TTBK1	4447729	4434722	9606.ENSP00000392147	9606.ENSP00000259750	0	0	0	0	0.062	0.187	0	0.28	0.402
MAP3K1	PPP3CA	4446923	4446333	9606.ENSP00000382423	9606.ENSP00000378323	0	0	0	0	0.064	0.185	0	0.279	0.402
NDUFA4	SOD1	4440978	4435927	9606.ENSP00000339720	9606.ENSP00000270142	0	0	0	0	0.283	0	0	0.198	0.4
PELI1	JARID2	4442187	4441136	9606.ENSP00000351789	9606.ENSP00000341280	0	0	0	0	0.064	0	0	0.385	0.4

## Sheet: degree
Nodes	Degree
GSK3B	21
CCND1	21
PPP3CA	14
PPP2R2A	13
PPP2R1B	13
PPP6C	12
SP1	12
YWHAE	11
HDAC4	11
GRIN2A	11
BRCA1	11
TCEB1	11
FOXO1	11
ANAPC1	10
TRIM37	10
ELAVL1	10
MAP3K7	9
SLC2A4	9
MAP3K1	9
NUP133	9
TRIM9	9
DYRK1A	9
UBE2K	8
PJA2	8
WDR82	8
ASB13	8
SOD1	8
KDM7A	8
QKI	8
RBFOX1	8
PPP1R2	8
DPYSL2	7
CDK9	7
MEF2D	7
UBE2O	7
CACNB2	7
JARID2	7
CDC40	6
LRP6	6
KAT6A	6
TMED10	6
CAMK2D	6
RALA	6
GRM4	6
CTNND2	6
SH3KBP1	5
SMARCC1	5
SATB2	5
CWC25	5
CASC3	5
FZD4	5
H3F3B	5
RAB14	5
SYNJ2	5
RELN	5
POU2F1	5
PDGFRA	5
MAP1B	5
TFRC	5
PLXNA2	5
CACNG4	5
TMF1	5
TAOK1	5
SLC1A2	5
PHF6	5
NUMB	4
PLXNA4	4
SEC24A	4
GABBR2	4
CLASP2	4
SLC6A6	4
LASP1	4
JMJD6	4
AFF4	3
MBD2	3
PPP6R3	3
VTI1A	3
STX12	3
KDELR2	3
RASA1	3
HIPK2	3
MYO5A	3
AMER1	3
KIF6	3
NFAT5	3
PIP4K2B	3
PURB	3
PTPN1	3
ANKRD40	3
JAZF1	3
IPO7	3
PRPF4B	3
ATF6	3
RHBDL3	3
KCNA1	3
PHF2	3
KLF9	3
GATAD2B	2
PELI1	2
HTR1D	2
MAP4K5	2
FZD3	2
PRLR	2
HBEGF	2
ATP8A1	2
INSC	2
STK40	2
FAM122A	2
VAPB	2
NCOA6	2
EPC2	2
FAM134B	2
IGF2BP1	2
ANKRD52	2
SLC5A3	2
PKHD1	2
CCAR2	2
ZNF81	2
SDC4	2
GLRA2	2
TRAM2	2
UHRF1BP1	2
NR4A3	2
VPS26B	2
ZFPM2	2
API5	2
KHDRBS3	2
KIAA0319L	2
DAZAP1	2
HOXA5	2
KLF13	2
TRMT1L	2
DDX28	2
TM9SF3	2
SLC16A2	2
PAX9	2
STRIP2	2
NAA15	2
SPRED1	1
NEK7	1
MLEC	1
TRIB1	1
YLPM1	1
PEX5	1
NUFIP2	1
RIMS3	1
ELOVL4	1
CERS3	1
DTNA	1
PTGER4	1
FAM8A1	1
BMPER	1
GLS	1
SLC39A10	1
ATL2	1
KPNA4	1
SLMO2	1
SOX11	1
NWD2	1
GGNBP2	1
C11orf87	1
CCNJL	1
HLF	1
TMOD2	1
SHE	1
CLCN3	1
CYP7B1	1
EIF4EBP2	1
DCP2	1
IDE	1
SH2D1A	1
RNF144A	1
ITM2B	1
SLC24A3	1
PARS2	1
VWA8	1
VGLL3	1
LBH	1
LRRC59	1
PPP1R9A	1
NR3C2	1
ARX	1
ZSWIM6	1
HTRA1	1
ACSL4	1
ACSS1	1
TSN	1
TAL1	1
RAPH1	1
TMEM161B	1
ELFN2	1
AKAP7	1
RSBN1	1
NKAIN2	1
TTBK1	1
NDUFA4	1
