# Supplementary material for: miR-224, miR-147b and miR-31 associated with lymph node metastasis and prognosis for lung adenocarcinoma by regulating PRPF4B, WDR82 or NR3C2
Source: PeerJ. 2020 Nov 24;8:e9704. doi: 10.7717/peerj.9704 (PMC7694553; doi:10.7717/peerj.9704)
Supplement: Table S4 [file peerj-08-9704-s004.xlsx]

## Sheet: Sheet1
	names	p	High.median	Low.median
14255	STRIP2	2.57e-05	37.2903	58.8102
1237	ATP8A1	0.000334107	58.8102	40.3787
6786	HSDL1	0.000666767	58.416	39.7216
220	ACSS1	0.000989516	58.416	38.4731
6615	HLF	0.00135266	56.6747	39.7216
1153	ATL2	0.00220392	56.6747	39.3273
12790	SATB2	0.00227884	39.9187	54.3091
3421	CREBRF	0.00248129	54.3091	40.3787
15188	TMOD2	0.00263389	59.0731	40.3787
1536	BRCA1	0.00370864	41.5614	53.6192
14911	TM9SF3	0.00441589	39.9187	50.3008
2581	CDC42BPB	0.00549257	40.5758	53.2906
3592	CTNND2	0.00554409	58.8102	41.66
3001	CLASP2	0.00563956	66.5969	40.5758
6830	HTR1D	0.00685338	41.66	58.8102
12312	RNF38	0.00736315	66.5969	41.66
11928	RBFOX1	0.00754296	58.416	39.9187
2122	CAMK2N2	0.00928764	38.3416	59.0731
4256	DPYSL2	0.00942938	56.6747	42.3171
4685	EPC2	0.0096759	66.5969	41.3314
5727	GATAD2B	0.01109	78.6217	41.5614
9135	MTFR1	0.0158825	44.5841	58.8102
464	AK4	0.0160686	41.66	58.416
7739	KPNA4	0.0178708	42.3171	53.2906
7874	LBH	0.0190887	60.1244	42.4814
6949	IGF2BP1	0.0190961	41.66	53.2906
4561	ELAVL1	0.0201291	39.9187	56.6747
9859	NR3C2	0.0252768	53.2906	40.3787
5623	FZD4	0.0279116	60.1244	42.3171
11400	PRPF4B	0.0303097	53.6192	42.3171
7270	ITM2B	0.0396747	52.5678	42.3171
11828	RALA	0.0400857	42.3171	56.6747
14571	TBX19	0.0401784	58.416	46.6868
11238	PPP2R1B	0.0405761	41.3314	53.2906
13335	SLC1A2	0.0416614	54.3091	44.5841
6960	IGFBP7	0.0426566	52.5678	42.4814
11573	PTGFRN	0.0453434	41.3314	56.6747
16458	YWHAE	0.0461165	42.4814	54.3091
8192	LRRC59	0.0493519	42.3171	53.6192
11261	PPP6C	0.0495724	53.6192	41.5614
13181	SHE	0.0498854	52.5678	42.3171
5622	FZD3	0.0498858	53.2906	44.5841
14959	TMEM110	0.00179086	59.0731	39.3273
8141	LRP6	0.0424287	53.6192	41.5614
7867	LASP1	0.00246553	41.3314	59.0731
