# Supplementary material for: miR-224, miR-147b and miR-31 associated with lymph node metastasis and prognosis for lung adenocarcinoma by regulating PRPF4B, WDR82 or NR3C2
Source: PeerJ. 2020 Nov 24;8:e9704. doi: 10.7717/peerj.9704 (PMC7694553; doi:10.7717/peerj.9704)
Supplement: Table S5 [file peerj-08-9704-s005.xlsx]

## Sheet: common-9mRNA-exp-zhuan-pair
gene	N	hsa-miR-31	SLC1A2	NR3C2	PPP6C	GRIN2A	hsa-miR-224	DPYSL2	PRPF4B	hsa-miR-371a	PTGFRN	hsa-miR-147b	WDR82	hsa-miR-1269a	PTGER4
TCGA-05-4249-01	N0	0.492348	0.224164	2.07422	4.6293	0.0592907	5.66167	5.94209	3.94375	0	3.8736	0	4.91049	0.492348	2.03747
TCGA-05-4382-01	N0	2.27435	0.0305185	0.867597	3.73466	0.00593604	4.27958	5.13863	3.28057	0	5.11501	2.27435	4.68351	9.1208	2.55871
TCGA-05-4389-01	N0	4.1978	0.213755	2.46901	3.93665	0.00139881	5.97408	2.94195	2.81507	0	3.45127	0.810974	4.05837	9.81658	2.2504
TCGA-05-4390-01	N0	0.639384	0.0918476	0.5672	3.48928	1.77197	1.99067	3.71182	3.24784	0	3.99497	0.456045	4.66351	1.08088	0.904274
TCGA-05-4403-01	N0	7.6977	0.041242	2.51355	3.98352	0.0264962	4.27291	5.15697	2.70226	0	3.80349	0.993432	4.42781	1.79796	2.41643
TCGA-05-4405-01	N0	0.355033	0.435883	2.00343	4.11059	0.0146832	5.74025	5.49263	3.5717	0.188411	4.60212	2.74842	5.12647	0.355033	1.98398
TCGA-05-4410-01	N0	5.14675	0.141789	2.97441	4.01184	0.0168036	5.521	4.63316	3.32093	0	4.39884	0.727478	4.64646	1.48712	2.46216
TCGA-05-4417-01	N0	1.9114	0.205083	1.55298	4.14223	0.0284861	2.93134	4.11555	3.40069	0	4.2453	1.55248	4.62436	2.10905	2.24886
TCGA-05-4420-01	N0	1.08939	0.0457378	0.610995	4.10252	0	2.84862	2.76171	3.52727	0	4.08372	2.731	4.41376	7.20573	1.09005
TCGA-05-4422-01	N0	1.74009	0.594237	2.06794	3.97377	0.212869	5.2353	4.0332	3.37414	0	2.23311	0.832028	4.63286	0.832028	2.14813
TCGA-05-4424-01	N0	0	0.164022	1.85994	3.90224	0.024909	6.32936	4.51143	3.23147	0.476327	4.71292	0.833816	5.02723	0.476327	2.64603
TCGA-05-4425-01	N0	3.83919	0.726385	3.01332	4.27657	0.00721754	4.93628	4.46844	3.33425	0.14169	3.67865	1.70944	4.59023	0.2707	2.25032
TCGA-05-4426-01	N0	4.26024	0.0197799	2.6277	4.11471	1.24154	7.53444	5.3655	3.24367	0	3.78164	2.18701	4.57589	3.68317	1.46721
TCGA-05-4430-01	N0	3.1207	0.0642666	2.41517	3.99091	0.0213868	5.14345	4.92912	2.98462	1.75217	4.46625	1.98579	4.86771	7.72258	2.56667
TCGA-05-4433-01	N0	4.62513	0.191437	2.96446	4.02395	0.0251598	1.97423	4.79066	3.37449	0.315102	3.45497	1.78283	4.85577	0	3.07973
TCGA-05-5715-01	N0	0.165352	0.581245	2.18275	3.48566	0.131133	5.78878	3.9298	3.3296	0	3.3186	1.06554	3.97688	0.887585	1.92883
TCGA-35-3615-01	N0	4.15778	0.0406498	2.46021	4.29934	0.00905826	2.68162	3.28777	3.51915	0	2.64943	1.48813	4.11266	0.679651	1.44302
TCGA-35-4122-01	N0	6.73928	0.0400048	1.02554	3.54377	0	4.87371	3.12758	2.40226	0	2.80466	3.13544	4.0223	0	2.38404
TCGA-35-4123-01	N0	4.59983	0.0305415	0.705177	4.27478	0	8.44173	3.57614	2.84094	0	2.59679	3.92137	4.02857	0	2.59868
TCGA-38-4625-01	N0	7.21882	0.0873373	0.391935	3.72781	0.0129068	8.19084	3.93571	3.12238	1.36406	4.33904	2.05247	4.32205	3.38467	1.70436
TCGA-38-4626-01	N0	2.91597	0.376377	2.31775	4.23563	0.0041825	5.39763	5.88209	3.22387	0	3.64807	0.952586	4.4942	5.4906	2.57777
TCGA-38-4629-01	N0	2.57405	0.0307194	1.01807	3.87978	0.186942	5.38808	3.1323	2.50447	0	3.09358	2.41561	4.46329	1.79801	3.60066
TCGA-38-4630-01	N0	4.49804	0.207574	1.49682	3.23225	0.0104285	5.61992	3.74534	4.21751	0	3.68054	0	4.69372	11.2177	2.74151
TCGA-38-4631-01	N0	6.11763	0.0509338	0.493203	3.56657	0.00613964	5.61614	1.85397	2.85623	0	2.69215	3.6355	4.27446	9.67221	0.806258
TCGA-38-7271-01	N0	0.634996	0.605384	2.25537	4.40271	0.0801867	4.96046	5.08044	3.22873	0.352156	3.70538	0.634996	5.03011	0.352156	3.27237
TCGA-38-A44F-01	N0	0.776273	0.167742	1.66384	3.70497	0.141661	5.01609	4.9337	3.50692	0	3.89045	0.776273	4.16869	0	3.14078
TCGA-44-2655-01	N0	4.13217	0.236713	1.43701	4.29626	0.0208943	3.99294	4.60765	2.97296	0	4.32174	0.853266	4.50208	1.59286	1.89178
TCGA-44-2656-01	N0	1.74284	0.372584	3.44373	4.39202	0.0589035	3.00734	5.07327	5.13869	0	2.71122	3.91472	4.59908	0.555213	3.58041
TCGA-44-2661-01	N0	0.465005	0.337649	1.80669	4.04347	0.117637	5.075	5.20014	3.41936	0	3.13141	0.465005	4.13601	1.53685	3.19395
TCGA-44-2662-01	N0	5.78507	0.670364	2.61493	4.08275	0.24185	7.17309	4.47641	4.99291	0	3.94464	5.35085	4.31439	4.21073	3.04495
TCGA-44-2666-01	N0	5.30073	0.399459	4.27282	4.48284	2.44819	3.40656	6.14988	4.7202	0	3.28044	1.13785	4.81349	6.81568	2.61225
TCGA-44-2668-01	N0	7.43312	0.232757	0.464237	3.5842	0.0184921	5.69021	3.93449	3.39097	1.41147	3.92112	4.64796	4.20836	2.36463	3.11021
TCGA-44-3398-01	N0	4.1665	0.116308	1.39807	4.346	2.34576	6.47862	4.61541	3.14507	0	3.05774	1.82522	3.59689	0	2.52242
TCGA-44-3918-01	N0	0	0.475162	2.15276	4.17823	0.795023	4.73462	4.09237	3.98713	0	3.42796	1.6994	4.6792	0.925289	3.05882
TCGA-44-3919-01	N0	3.36544	0.117636	2.00849	4.30197	0.014373	5.01829	4.51057	3.38585	0	4.46977	3.06478	4.80491	4.77439	2.65716
TCGA-44-4112-01	N0	2.69947	0.530535	3.18042	4.44879	1.84393	4.25226	5.1838	4.62416	0	4.61678	0.835998	4.98396	4.19156	3.05548
TCGA-44-5644-01	N0	0.745585	0.62104	0.0670689	3.58626	0.00566401	1.12707	4.39569	3.72701	0	2.92183	3.87796	4.35585	9.77771	0.554155
TCGA-44-6145-01	N0	5.77436	0.348992	1.16544	4.4716	0.0026928	5.41013	4.17422	3.36968	0.384388	4.33601	1.15136	4.40845	1.15136	2.47545
TCGA-44-6146-01	N0	6.66728	0.491273	4.16943	4.56783	0.31093	3.69102	5.26154	5.05174	0.402764	4.04784	3.47822	5.03772	1.83847	2.44767
TCGA-44-6148-01	N0	4.61124	0.456034	3.23192	4.04337	0.0338869	4.75236	5.41535	3.66877	0.442327	4.77715	0.162981	4.73775	7.2865	3.49429
TCGA-44-6775-01	N0	4.55698	0.693096	3.57457	4.54558	0.176827	6.20228	5.49825	4.93803	0	4.39529	1.92309	4.66894	0.63537	3.38651
TCGA-44-6776-01	N0	0	0.250794	2.59792	4.4278	0.550347	4.15426	4.42629	3.35266	0	3.39837	0	3.76436	2.75354	1.34916
TCGA-44-6778-01	N0	1.32621	0.323656	1.89078	4.56378	0.0332024	1.89274	5.81924	3.82698	0	3.54687	0.929384	4.82973	9.06241	4.00292
TCGA-44-7659-01	N0	1.71151	0.125714	3.01716	4.33715	0.0152715	5.03784	5.29825	3.70379	0	2.87608	0.722476	4.36299	0.981864	1.71576
TCGA-44-7660-01	N0	5.60614	0.213951	1.42552	3.63949	0.00163128	4.74428	3.7355	3.36281	0.572244	5.48706	0.790981	4.34928	5.35475	1.11082
TCGA-44-7661-01	N0	5.57872	0.112235	1.5501	3.87645	0.0455768	4.08657	5.24273	3.48266	1.12148	4.35037	2.10164	4.94332	0.770128	2.72132
TCGA-44-7662-01	N0	3.5444	0.0190227	1.74203	4.41343	0	5.28016	3.8685	3.42344	0.274009	3.66627	1.81145	4.47135	2.31443	3.53158
TCGA-44-7667-01	N0	1.14087	0.0131915	0.0520487	4.27818	0.037479	2.54116	3.86378	3.48169	0.850744	3.03049	2.0751	5.12804	7.29339	0.633651
TCGA-44-7671-01	N0	2.94089	0.0653917	1.84731	4.36056	0.0447596	3.58911	5.03217	3.11552	0	3.72729	0	4.36643	0	2.15626
TCGA-44-7672-01	N0	0.693853	0.104005	0.61269	3.97941	0.00938754	3.80422	4.66051	3.20151	0	4.36239	1.91808	4.54642	4.26447	2.37542
TCGA-44-8117-01	N0	0.462857	0.0178393	2.24917	3.60434	0.0308239	8.03033	4.28378	3.60176	0.249913	2.34137	2.61038	4.17464	1.21657	1.83173
TCGA-44-8119-01	N0	3.4522	0.601675	1.03231	4.57992	0.0309324	3.6486	3.57051	3.2813	0	4.58388	1.15561	4.27713	5.69913	1.78259
TCGA-44-8120-01	N0	1.87722	0.0636737	2.56774	3.65103	0.0187101	6.39796	5.22419	3.79405	0.199797	2.96059	1.81768	4.61923	1.55138	2.14995
TCGA-44-A479-01	N0	0.837595	0.349902	0.81213	4.31111	0	3.63372	3.93545	3.94044	0	4.11592	0.478748	4.77151	0.837595	2.76387
TCGA-44-A47A-01	N0	0	1.88914	1.25307	3.77176	0.00839364	5.93131	4.67962	3.28582	0	3.74699	2.06791	4.16485	0	1.67353
TCGA-44-A47B-01	N0	0.552299	0.149605	2.16311	4.26167	0.403028	3.86059	6.2939	3.71279	0	4.1642	0.662686	5.06369	4.33079	1.93028
TCGA-44-A47G-01	N0	5.3955	0.115244	2.41837	3.81925	0.0510044	4.98111	4.55585	3.4238	0	4.13557	2.37202	4.42791	7.1882	2.58363
TCGA-44-A4SS-01	N0	4.79506	0.0794296	1.0585	3.51681	0.0112048	6.77985	4.04187	3.4224	0	4.87482	1.78528	4.23301	8.89063	2.25383
TCGA-44-A4SU-01	N0	1.15865	0.256271	1.55756	3.61669	0.155494	6.86093	3.51676	3.65295	0	4.40454	2.09985	4.66862	4.66927	1.52621
TCGA-49-4486-01	N0	0.606223	0.0664091	0.891084	4.13633	0.00836387	4.73288	4.50009	2.56802	0	2.1619	0.606223	3.68357	2.63754	0.603254
TCGA-49-4487-01	N0	1.03663	0.156663	0.869791	4.38315	0.00344609	2.98904	3.88292	3.41419	0	4.44341	1.81698	4.80832	6.5244	2.03832
TCGA-49-4488-01	N0	1.47327	0.0389448	0.304406	4.3836	0	1.31058	3.85483	2.79084	0	3.10185	2.1552	4.5845	3.71583	1.26633
TCGA-49-4501-01	N0	2.85022	0.413126	1.8557	3.96288	0.0213075	5.49852	4.48296	3.08125	0	3.76578	0.449279	4.35047	3.28815	2.23527
TCGA-49-4514-01	N0	2.98545	0.168333	1.51211	3.44732	0.00528772	6.32063	3.64224	2.58411	0	2.66995	2.157	3.42191	2.08529	0.984047
TCGA-49-6767-01	N0	1.14291	0.00332682	0.202644	4.76449	0.00512948	5.48865	3.16295	3.26131	1.26882	3.31404	3.7747	4.84957	7.33536	1.43473
TCGA-49-AAR0-01	N0	4.01899	0.261775	1.18611	3.85145	0.0191263	4.91265	4.66041	3.05862	0	3.48451	1.45339	3.98475	4.26711	1.74106
TCGA-49-AAR2-01	N0	2.13212	0.703481	1.24746	3.68093	0.0125845	5.5706	3.03949	2.80353	0.708784	3.43738	2.13212	3.51697	0.276765	0.867876
TCGA-49-AAR9-01	N0	8.01803	0.00488498	0.105628	3.7937	0.00565098	2.7415	1.95913	3.03615	0	5.11406	5.85491	5.10104	8.6242	1.61802
TCGA-49-AARE-01	N0	5.37588	0.124366	0.665995	3.84156	0.00846607	6.53165	3.16722	3.10098	0	3.65433	3.79001	4.2455	9.68765	0.909814
TCGA-49-AARN-01	N0	3.15387	0.138609	1.37531	4.02704	0.029406	6.97751	4.70261	3.35711	0.187265	3.82691	2.61549	4.37633	0.187265	1.16174
TCGA-49-AARO-01	N0	3.9973	0.0921768	1.54132	3.63641	0.080607	6.45931	4.37608	2.91874	0.221981	4.31994	3.9515	4.2426	0.414317	2.15444
TCGA-49-AARQ-01	N0	8.83947	0.0943782	1.47554	3.60804	0	6.83603	3.37424	2.64156	0	2.40318	1.52981	4.3136	0.394601	0.788766
TCGA-49-AARR-01	N0	3.44935	0.371121	2.0956	3.89999	0.115743	3.94085	4.76766	3.6571	0	3.72373	1.03962	4.31758	1.53617	3.36344
TCGA-4B-A93V-01	N0	6.32049	0.235247	0.514488	4.14298	0.0018239	2.72511	4.34816	2.71829	0	2.45814	1.9283	3.95161	0	1.07575
TCGA-50-5049-01	N0	3.7137	0.0861778	1.73866	4.45718	0.0141041	4.12273	4.38292	3.13417	0.47609	3.94264	1.35833	4.62004	1.11963	3.29979
TCGA-50-5066-01	N0	7.42798	0.0585726	1.14841	4.08094	0	3.17586	3.26341	2.91046	0.540949	2.07821	2.26035	3.95003	7.34967	2.40591
TCGA-50-5931-01	N0	6.52872	0.191629	1.68698	4.02995	0.142752	5.36887	3.21756	3.94986	0	6.14865	5.41038	4.54741	10.3833	2.55568
TCGA-50-5935-01	N0	0.732321	0.203777	2.45558	4.20243	0.23219	6.58716	4.65891	3.37702	0	3.36627	1.10922	4.02939	7.4293	1.56029
TCGA-50-5939-01	N0	5.46918	0.0881312	1.05157	4.21378	0.023181	5.85012	3.84996	3.08033	0	4.97401	0.580902	4.30739	2.2128	2.48338
TCGA-50-5942-01	N0	2.18555	0.133172	3.16757	4.27572	0.10602	5.1611	5.64925	3.37154	0	3.43677	0	4.86386	0.558955	2.60351
TCGA-50-5944-01	N0	1.31991	0.224646	2.89578	3.53971	0.0214757	5.36304	6.74957	3.24128	0	4.22306	0	4.65609	1.39024	2.97685
TCGA-50-5946-01	N0	2.60726	0.0804116	2.03646	4.45002	0.00271199	3.42055	3.59741	4.35869	1.17529	4.02545	0.564996	4.90627	6.62985	0.98239
TCGA-50-6590-01	N0	5.55835	0.0549913	0.307641	4.33756	0.00957698	5.47962	3.79354	3.133	0	4.1866	2.66973	4.83733	1.05146	2.49824
TCGA-50-6591-01	N0	3.5086	0.0735148	1.17896	3.8466	0.0150981	4.24271	4.8774	4.23069	0.394609	5.17694	0.394609	4.98195	11.3491	4.57622
TCGA-50-6592-01	N0	4.73076	0.80977	1.41635	4.21099	0.00353131	6.57567	3.04721	2.96929	0.213753	3.96927	3.24248	4.70209	0.969535	2.33204
TCGA-50-6597-01	N0	2.52586	0.158019	2.25135	4.75431	0.00987567	5.29645	3.37692	1.43782	0	4.09044	1.09297	4.27193	0.748358	1.02493
TCGA-50-6673-01	N0	4.38858	0.103084	2.10768	3.55135	0.0473004	6.30875	4.34629	3.42006	0.398196	4.707	0.638077	4.34624	6.08722	2.33752
TCGA-50-7109-01	N0	0.645818	0.490045	0.802425	4.17992	0.110372	2.19408	3.43703	3.71598	0	4.18642	0.460919	4.62858	0.956833	1.61274
TCGA-50-8457-01	N0	1.16905	0.131489	2.57581	3.98882	1.31687	6.41418	5.72804	3.47531	0	4.03288	0	4.74856	3.71964	3.21999
TCGA-50-8459-01	N0	2.1687	0.184898	0.801073	3.59093	0.0485804	5.26992	4.53365	2.95234	0.285119	4.4826	1.20856	4.623	0.285119	2.46666
TCGA-50-8460-01	N0	0.507813	0.107221	2.14633	3.40574	0.33896	5.80066	5.52286	2.80323	0	3.31942	0.276135	4.39345	0.707383	1.97681
TCGA-53-7624-01	N0	1.8971	0.014839	0.153881	3.14921	0.00574159	4.59451	2.17895	3.74374	11.5739	4.71122	2.96562	4.17608	7.62083	0.959108
TCGA-53-7813-01	N0	2.89312	0.262842	1.28714	4.11624	0.649655	2.84613	4.41465	3.72028	0	3.27231	0.561894	4.25081	2.03398	0.868625
TCGA-55-1592-01	N0	0	0.205267	2.20479	3.92171	0.00929404	9.32243	4.24966	3.2477	0	4.93722	2.16361	4.36193	8.63575	2.32765
TCGA-55-6543-01	N0	4.04462	0.344486	2.2433	4.19749	1.37811	5.90099	5.3096	3.2165	0	3.89533	0.827925	4.62784	0.389624	2.11101
TCGA-55-6642-01	N0	1.12067	0.210755	1.60681	4.20808	0.561568	2.29717	4.56809	3.4302	0	4.7047	1.12067	4.85632	0	1.4444
TCGA-55-6968-01	N0	5.03516	0.06585	0.406764	4.49288	0	2.62177	4.84774	3.66731	0	4.83114	1.44273	4.857	6.07734	2.12406
TCGA-55-6971-01	N0	3.00349	0.338682	1.8731	4.1441	0.0104789	2.94752	5.01356	3.48495	0	4.10577	1.55232	5.1451	1.64908	2.74783
TCGA-55-6972-01	N0	0.447729	0.0731168	1.27682	4.7864	0.00769369	6.01527	2.9544	3.4954	0	1.5414	0.447729	4.03999	6.88328	0.757468
TCGA-55-6978-01	N0	6.52143	0.0872301	0.579557	3.89341	0.0143794	4.73094	4.96958	3.84575	3.6135	4.12708	3.79661	5.12563	4.24668	2.89365
TCGA-55-6980-01	N0	4.50372	0.125439	1.73412	3.71834	0.633136	7.27906	4.57367	2.8485	0.230801	4.58593	2.41607	4.27965	1.02922	2.90958
TCGA-55-6985-01	N0	2.93785	0.24064	2.78999	4.12148	0.273839	6.74178	4.60472	3.34236	1.11018	4.36315	2.49439	4.4539	1.11018	2.7927
TCGA-55-6986-01	N0	5.86958	0.136615	1.88558	4.14527	0.175891	5.91961	5.69369	3.21529	0	4.10153	1.46898	4.95163	4.55736	1.99026
TCGA-55-6987-01	N0	4.74871	0.274092	1.09578	4.79136	0.019078	6.97723	4.10304	3.35608	0	3.5845	3.50943	4.55153	6.91344	2.81424
TCGA-55-7281-01	N0	0.955046	0.122822	1.74808	4.01211	0.00805067	5.10324	5.38124	2.58962	0.143123	4.23859	1.03064	4.45787	4.51079	1.86257
TCGA-55-7284-01	N0	5.43793	0.171724	2.72597	4.03907	0.0283754	4.47583	4.80747	3.12224	0	3.89466	1.79241	4.49651	4.70605	2.53389
TCGA-55-7570-01	N0	4.41676	0.0504993	0.159812	3.76938	0.0298942	2.90974	3.21022	4.28212	1.15155	4.54638	1.39435	4.3227	0.492803	1.11926
TCGA-55-7573-01	N0	1.10316	0.460077	2.39035	3.91491	0.210622	5.2116	5.53272	3.8581	0	4.7942	0.756127	4.25567	1.3827	2.74776
TCGA-55-7574-01	N0	0.760381	0.364998	1.7997	4.18052	0.0740348	4.0643	4.92223	3.6812	0.760381	3.83534	2.76188	4.69026	3.82628	3.1127
TCGA-55-7576-01	N0	0.426588	0.0628459	2.17728	4.56154	0.0164233	7.04531	4.71437	3.04658	0.600343	4.43789	1.02301	4.65126	0.600343	2.03407
TCGA-55-7724-01	N0	3.45974	0.297638	1.98309	4.47081	0.103757	6.04035	5.33612	3.2563	0	5.73548	1.00017	4.71085	4.57321	3.06857
TCGA-55-7725-01	N0	0	0.10939	2.99987	4.61342	0.871516	2.88245	5.09976	4.07305	0	3.03571	0.807262	4.52825	0	2.42816
TCGA-55-7726-01	N0	2.77621	0.0739986	0.299973	4.73082	0.0239188	4.72518	4.12572	3.3519	0	5.75591	2.02557	4.74675	5.2481	2.28237
TCGA-55-7728-01	N0	5.25734	0.117469	1.65784	3.56191	0.0254001	4.61433	4.42224	2.94249	0	3.22121	1.36875	3.96987	0.165723	2.24218
TCGA-55-7815-01	N0	0.336224	0.948689	2.58958	4.47014	0.0192555	1.50444	4.18264	3.62418	0	4.82758	0.608712	5.03895	6.12978	2.00534
TCGA-55-7903-01	N0	1.20119	0.0540063	1.78507	4.50291	0.003854	5.56504	3.59899	3.50199	0	3.26399	2.15859	4.88355	1.20119	1.48686
TCGA-55-7910-01	N0	0.422768	0.071291	0.399535	3.80874	0	1.24	3.86208	3.99256	0	4.75873	0.749315	3.96324	0.749315	0.731499
TCGA-55-7911-01	N0	0	0.0765553	1.56929	4.07468	0.0207638	5.90354	5.64216	3.84752	0.32495	3.14876	2.82026	4.52983	0	2.57979
TCGA-55-7913-01	N0	2.86275	0.242558	1.23686	4.34955	0.0549449	5.91299	3.38426	3.65594	0	4.59993	3.36384	4.52669	1.83028	0.790744
TCGA-55-7994-01	N0	3.93162	0.0332411	1.66159	3.94632	0.0732013	7.77222	4.2176	3.69695	0.389551	1.50755	2.14073	4.92002	0.695969	2.82994
TCGA-55-7995-01	N0	6.77497	0.648593	1.82276	4.01542	0.00498529	10.3625	3.59279	3.6575	0	3.52861	2.11732	4.02825	4.14522	2.84427
TCGA-55-8085-01	N0	1.58209	0.131392	1.95421	3.97072	0.00412848	4.79582	3.42543	4.00031	0	3.46261	2.31848	4.53459	9.64547	1.88393
TCGA-55-8087-01	N0	0.734746	0.454629	3.05084	4.39297	0.0386243	5.16719	5.30169	3.9274	0	3.54701	0.483842	4.81463	0.483842	1.73418
TCGA-55-8089-01	N0	7.40367	0.0749463	0.960078	3.84155	0.101539	3.53419	4.83422	3.44158	0	3.57908	1.73272	4.86459	0.331328	3.30518
TCGA-55-8090-01	N0	2.34998	0.139778	2.28801	3.83959	0.00912042	6.4096	5.7982	3.04624	0	4.14173	4.37905	4.22221	2.34998	1.83548
TCGA-55-8091-01	N0	4.7857	0.194677	1.91286	4.34269	0.865545	5.45894	5.05433	3.0359	0	3.68063	0	4.7148	3.86535	2.26431
TCGA-55-8092-01	N0	7.02523	0.0606848	1.98519	4.1917	0.00447537	4.61861	3.43276	4.17373	0	3.49322	0.965083	4.55132	9.27482	1.89237
TCGA-55-8094-01	N0	3.27361	0.543239	1.16307	3.54255	0.0147052	1.68619	4.08581	3.31964	0	3.1869	1.14395	3.69816	7.95074	0.481017
TCGA-55-8096-01	N0	2.2366	0.842161	1.59293	3.68782	1.63232	7.7637	4.27741	3.49278	0	4.63634	2.04496	4.43736	0.833219	2.07437
TCGA-55-8097-01	N0	0	0.297291	2.41578	3.9794	0.0481158	5.24668	4.76773	4.12449	0	3.85448	0.6047	4.74913	5.86475	1.97333
TCGA-55-8203-01	N0	0.290572	0.207222	1.19855	4.08867	0.148377	6.01823	5.02138	3.69148	0	3.89703	1.47768	4.88798	5.46878	1.71068
TCGA-55-8204-01	N0	5.69399	0.0946256	0.83944	3.78119	0.0562892	5.23484	3.21281	3.29588	0	5.78331	1.84606	4.33378	0.405337	3.16859
TCGA-55-8205-01	N0	6.33666	0.0936045	0.978319	3.99326	0.0140075	5.38805	4.40767	3.78802	0	4.45507	1.70178	4.98164	1.55147	3.46316
TCGA-55-8206-01	N0	1.02527	0.616202	2.71022	3.84368	0.0264786	7.35927	5.0511	4.13298	0	3.46056	0.33209	4.47655	1.27715	3.38455
TCGA-55-8207-01	N0	0.728178	0.0441655	2.62326	3.72915	0.223872	6.12799	4.63653	3.7001	0	3.50723	0.728178	4.27182	2.48435	2.83398
TCGA-55-8208-01	N0	6.16538	0.216053	1.42108	4.03253	0.0165521	5.64002	4.22778	3.6726	0	4.18629	4.99518	4.5485	5.50379	3.18038
TCGA-55-8299-01	N0	4.39726	0.515988	1.7427	4.00084	0.00517325	4.94009	4.83553	3.42488	0	5.33497	1.95138	4.60403	1.78986	2.55241
TCGA-55-8301-01	N0	3.13197	0.182692	1.10839	3.89451	0.0824421	5.67326	4.69318	3.12642	3.03993	3.64141	1.05913	4.55324	7.3424	2.29019
TCGA-55-8302-01	N0	3.53764	0.0404215	1.16019	3.85425	0.00900683	2.61796	3.31165	2.69681	1.08211	3.27204	2.69465	4.41026	0.416992	1.77928
TCGA-55-8506-01	N0	0.564822	0.862775	1.56624	4.31352	0	6.75305	4.54849	2.67462	0	4.14002	2.34291	3.65061	0.564822	1.16835
TCGA-55-8507-01	N0	0.787868	0.424053	1.06877	3.81156	0.0273944	3.38471	4.62156	3.82435	0	4.18635	2.422	4.53605	1.18359	1.79725
TCGA-55-8510-01	N0	4.8112	0.10383	2.09105	3.63261	0.0266213	6.80721	4.49327	3.13918	2.01726	3.75634	2.54626	4.13784	1.28358	2.61618
TCGA-55-8511-01	N0	2.24171	0.0785535	1.96057	3.98747	0	3.95229	3.61944	4.51937	0.286156	3.49974	2.9225	4.32048	0.524839	2.50336
TCGA-55-8513-01	N0	5.66181	0.318625	2.25433	3.80447	0.0358214	4.38856	5.02507	3.56255	0	3.71378	0.963313	4.42032	0.307366	3.10163
TCGA-55-8514-01	N0	1.33821	0.249814	1.28522	3.44186	0.00767711	2.30162	5.12949	3.26284	0	3.22522	3.34629	3.86486	0	1.50092
TCGA-55-8614-01	N0	4.07193	0.34928	2.36218	3.8277	0.0453907	6.21132	3.42338	3.41725	0	5.66251	0.222192	4.24675	0.584497	5.00388
TCGA-55-8616-01	N0	1.49235	0.156885	2.12238	3.78565	0.0129432	6.77885	3.93154	3.25979	0	3.33869	1.59215	4.00816	8.7077	2.54972
TCGA-55-8619-01	N0	4.05017	0.211114	2.25871	4.02991	0.120715	5.40055	5.68032	3.24238	0	3.57419	2.82064	4.22486	0	3.31191
TCGA-55-8621-01	N0	1.66658	0.254754	2.25144	4.14406	0.0827077	4.32953	5.4333	3.34226	0	3.46387	0.82916	4.46142	6.78597	3.33911
TCGA-55-A48Y-01	N0	2.60059	0.106229	1.45373	4.13821	0.00207263	4.69694	4.12842	3.51961	0	4.30444	0.474713	4.51535	0	1.3598
TCGA-55-A490-01	N0	0.93772	0.0179611	1.6543	3.46443	0.00397794	7.12617	3.31151	3.06298	0	4.51802	2.35607	4.42261	0	0.804517
TCGA-55-A491-01	N0	4.63478	0.0512043	1.2684	3.36073	0.00633484	6.54844	3.61845	2.86403	0	4.06271	1.80538	3.91639	5.68535	1.58822
TCGA-55-A492-01	N0	1.51289	0.0426041	0.88626	3.43871	0.0402023	5.22721	4.29076	2.79404	0	2.66739	0	2.85297	0	1.19579
TCGA-55-A493-01	N0	7.07276	0.062999	0.356036	3.40304	1.06691	8.44021	3.65082	3.29016	0	4.31544	4.09818	4.17624	4.67661	2.51011
TCGA-55-A494-01	N0	0.370504	0.197446	0.591259	2.97179	0.00187495	6.43461	4.78031	3.84907	1.46301	3.76481	0.909514	4.83787	5.02781	0.311985
TCGA-55-A4DF-01	N0	5.96996	0.1757	0.789565	3.84757	0.00405446	4.92297	4.05093	3.78563	0	3.77781	2.32533	4.14688	8.76745	2.40101
TCGA-55-A4DG-01	N0	1.18381	0.256675	3.13753	3.79722	0.00227933	3.69184	4.25439	4.1376	0	3.07056	0	3.91211	2.11715	2.93044
TCGA-55-A57B-01	N0	2.55845	0.264291	2.51963	3.49994	0.729292	7.43255	4.84221	3.5771	0	4.32896	0.517564	4.49814	3.98332	2.53739
TCGA-62-8395-01	N0	1.44867	0.954678	2.34795	4.0516	0.0866658	4.88065	4.18583	3.44526	0	3.29857	1.07082	4.16002	0.394477	2.00338
TCGA-62-8397-01	N0	0.644983	0.0124101	2.52922	3.77566	0	5.75712	6.23139	2.85776	0	3.79843	0.35824	3.54814	0.248422	1.28621
TCGA-62-A46O-01	N0	6.51611	1.43007	0.43633	3.91627	0.00467218	1.92929	1.50497	4.28638	0	4.93214	4.57904	3.86623	2.46913	0.282135
TCGA-62-A46P-01	N0	0.295595	0.0829709	2.33612	3.75266	0.315229	3.19945	3.76901	3.19367	0	3.59301	1.24144	3.79736	0	0.829612
TCGA-62-A46R-01	N0	0.754799	0.0963096	2.10788	3.8714	0	6.62031	5.45704	3.26021	0	3.35872	0.754799	4.02647	0.29764	2.0245
TCGA-62-A46S-01	N0	4.35403	0.349448	2.34159	3.96398	0.0414697	4.27458	4.36606	3.72613	0	2.85556	0.630302	4.46522	0	1.75836
TCGA-62-A46V-01	N0	0.191203	0.0945301	2.96742	3.47025	0.014188	5.54763	6.09067	3.91013	0	3.13321	0.772794	4.1233	0.511109	1.32105
TCGA-62-A470-01	N0	4.79833	0.643816	1.4238	3.7523	0.00990187	2.63341	4.6098	4.19818	0	3.63878	1.7665	3.85767	0.848604	2.17944
TCGA-62-A472-01	N0	0	0.162372	2.32249	4.46649	0.0246463	6.38157	4.02884	3.37338	0	3.45397	1.36245	4.59841	0.292146	2.00056
TCGA-64-1676-01	N0	6.29262	0.0244574	1.1008	3.6603	1.36332	7.39558	3.04369	2.67096	0	3.01914	3.50447	3.29341	1.48532	1.59577
TCGA-64-1678-01	N0	2.90665	0.0179771	0.110451	4.06732	0	1.66277	2.45572	3.42471	0	2.56128	3.6909	3.22982	4.19613	0.303583
TCGA-64-1681-01	N0	1.31096	0.737582	2.31629	3.72336	0.901507	4.53705	4.55419	2.66337	0	4.57185	0.454457	4.50073	1.68778	2.03715
TCGA-64-5774-01	N0	0.230747	0.130839	0.882326	3.98824	0.148453	1.45123	3.93596	3.52628	0	4.20829	0.900883	4.76641	8.85178	0.763365
TCGA-64-5775-01	N0	9.35654	0.0390379	0.214091	3.78543	0.180865	6.06257	3.83856	3.2169	0	1.33581	0.467563	5.4412	6.07081	1.51189
TCGA-64-5778-01	N0	5.04068	0.072144	1.31334	4.40048	0.00632696	3.35364	3.74167	3.00585	0.500275	3.41507	2.03866	4.32323	1.23086	2.09807
TCGA-64-5781-01	N0	6.53391	0.0198862	0.907985	4.22994	0.00513972	4.87974	2.77503	2.77934	0	4.14134	1.15881	3.96496	2.78649	1.97489
TCGA-67-3770-01	N0	2.65112	0.164002	2.02077	3.55349	0.0323144	5.47334	3.67854	2.99555	0	2.18627	1.97607	3.52952	9.2832	2.18485
TCGA-67-3771-01	N0	3.34728	0.0971899	0.731136	4.04515	0.0171326	5.15957	3.16005	3.19983	0	3.43102	3.67799	4.46193	2.0968	1.96074
TCGA-67-3772-01	N0	2.40785	0.676834	2.11282	3.7063	0.117486	4.5939	4.56272	3.07051	0	3.5107	1.38684	3.9525	3.48912	2.08506
TCGA-67-3773-01	N0	1.83696	0.117222	2.22629	4.3585	0.00606473	2.40261	4.07354	2.93931	0	2.79974	2.14733	3.83028	2.14733	2.27816
TCGA-67-3774-01	N0	1.44991	0.151509	2.43565	4.07692	0.00927076	4.00088	4.79474	3.43535	0	3.36628	0.657458	4.72997	8.02032	2.40577
TCGA-67-4679-01	N0	0	0.0537932	2.88242	4.66079	0.0988939	5.51973	5.08678	3.73315	0	3.18477	0	4.42312	0.957169	2.74989
TCGA-67-6215-01	N0	0	0.58401	2.19123	4.07093	0.954716	4.23557	5.62744	3.43651	0	4.19544	1.28298	4.56958	0.967616	1.44535
TCGA-67-6216-01	N0	3.65008	0.207449	2.4832	4.13822	0.605142	5.31018	5.31392	3.12007	0	4.07753	2.13928	4.7016	1.1481	1.90169
TCGA-69-7760-01	N0	0.380123	0.587544	1.3777	3.87925	0.215464	7.03261	3.82456	2.58115	0	4.17732	2.29833	4.51127	5.05552	0.743401
TCGA-69-7761-01	N0	0.446579	0.0885597	1.97516	3.74277	1.10481	5.24816	4.70909	3.95327	0	4.87346	1.66759	4.78493	0.787106	2.52319
TCGA-69-7763-01	N0	0	0.139293	2.03654	4.19833	0.0157076	2.99319	5.28663	3.6656	0	3.4234	0	4.53959	0.413094	2.19486
TCGA-69-7764-01	N0	1.65812	0.275594	2.15523	4.0489	0.632812	2.40928	4.9207	4.02836	0	3.57817	0	4.77723	7.85878	1.95502
TCGA-69-7765-01	N0	1.67934	0.233466	1.84748	4.16352	0.0811168	4.70665	5.49164	3.53533	0	4.33894	1.46584	4.63114	1.21517	1.75449
TCGA-69-7973-01	N0	0.419185	0.18741	0.667093	3.72575	0.438098	3.67819	4.89091	3.62785	0	4.27699	0	4.47546	0	1.34981
TCGA-69-7979-01	N0	1.68778	0.0617379	2.66559	4.58658	0.00638834	8.20454	3.98987	3.57229	0	4.02266	1.79429	4.17668	8.76799	1.26335
TCGA-69-7980-01	N0	0.735452	0.0401615	2.56814	3.79202	0.00261565	5.73144	4.7947	3.41928	3.3281	4.01611	2.15626	4.44832	11.8346	2.03612
TCGA-69-8255-01	N0	2.16529	0.969421	0.75895	3.42482	0.0104248	2.83815	2.56914	3.66568	0.269074	3.53502	2.16529	4.54813	7.87239	2.43809
TCGA-69-8453-01	N0	4.94343	0.160664	1.61609	3.99357	0.0292458	3.75078	5.11071	3.13827	0	3.52197	1.02749	4.58752	0.428847	3.38146
TCGA-69-A59K-01	N0	0.825078	0.0304774	1.59158	3.9241	0.290393	5.64937	4.54592	3.23234	0	3.34296	0	4.72695	0.470735	1.96684
TCGA-71-6725-01	N0	0	0.187515	1.89254	4.12585	0.00364435	8.18725	5.59036	2.79318	0	3.85883	1.78822	4.41786	0.385968	0.719357
TCGA-71-8520-01	N0	1.94833	0.135587	2.53148	3.53844	0.01596	6.00919	5.24678	3.06433	0	5.36112	0.224279	4.50836	1.74619	1.46768
TCGA-73-4658-01	N0	1.61458	0.047081	1.91625	4.12952	0.0387015	4.49902	5.18878	2.80236	0	3.99386	0.801075	4.79945	0.114352	3.10811
TCGA-73-4662-01	N0	2.18463	0.0934065	1.90548	3.91011	0.00867447	5.02111	5.04521	3.74973	3.01654	3.17151	0.915734	4.80364	1.87168	2.50477
TCGA-73-7498-01	N0	0.714531	0.174928	2.16655	4.19074	0.0507439	5.79392	5.08062	3.87269	0	2.93103	0	4.26385	1.08519	2.43764
TCGA-73-7499-01	N0	3.51398	0.0911073	0.980612	5.00362	0.00301966	6.97827	3.76303	3.10981	0	2.85606	0.895833	4.38981	6.99783	1.831
TCGA-73-A9RS-01	N0	6.37977	0.574404	0.119004	3.91596	0	2.66018	1.6668	3.94033	0	3.32075	0.862854	4.07153	0	0.789231
TCGA-75-5122-01	N0	5.2483	0.0357576	1.77723	4.24735	0.0162003	6.48161	4.30417	3.31867	0	2.93924	0.235214	4.70164	0	3.58681
TCGA-75-5146-01	N0	2.08289	0.56659	2.08675	3.86114	0.00838394	4.4619	5.07776	3.27522	0	2.92044	0	3.83996	7.3472	2.37261
TCGA-75-5147-01	N0	3.9047	0.105115	1.68062	4.30715	0.00762655	5.6168	3.29992	3.17871	0	3.51006	1.90427	4.30683	10.6012	2.02988
TCGA-75-6205-01	N0	6.93435	0.119901	2.78732	3.92069	0.0110856	6.28977	4.51889	2.98339	0	3.47085	1.65523	4.89712	1.96993	3.37863
TCGA-75-6206-01	N0	1.06657	0.517773	2.10604	3.90101	0.0135098	4.16074	5.81108	3.66543	0	3.49693	0.392537	4.6219	0.954644	2.14558
TCGA-75-6211-01	N0	0.808627	0.0829907	0.629963	4.56639	0	6.23655	3.78225	3.73899	0	4.27928	0.536974	4.5302	1.03714	1.21651
TCGA-75-7025-01	N0	3.68541	0.371886	2.06789	3.6511	0.696888	7.17152	5.16825	3.50552	0	4.16138	1.73495	4.56238	10.5701	2.90948
TCGA-75-7027-01	N0	5.609	0.0189686	1.16398	3.65067	0.0124097	5.28703	3.32765	3.70851	0	4.76713	1.58971	4.42694	9.28322	1.03496
TCGA-75-7030-01	N0	7.1479	0.233898	2.40456	3.98839	0.0358258	4.39426	5.22372	3.1868	0	4.51124	1.68505	4.74694	1.2199	2.7071
TCGA-75-7031-01	N0	5.34709	0.201779	1.69659	4.26891	0	3.32626	3.8919	3.07328	0	2.37095	1.5177	4.37676	4.21957	1.76396
TCGA-78-7143-01	N0	3.38714	0.171736	2.98116	3.98288	0.173543	5.86803	4.7908	3.63158	0	4.7838	0.395517	4.97901	0.395517	1.76261
TCGA-78-7149-01	N0	2.02947	0.0730965	1.03847	3.36373	0.0455457	3.60576	4.46668	3.30416	0	2.84223	0.470218	4.40155	1.72766	0.84221
TCGA-78-7152-01	N0	1.29737	0.174425	1.80455	4.26302	0.0186974	2.48964	3.63793	3.10768	0	3.97327	0.313788	4.8661	3.09288	1.7018
TCGA-78-7153-01	N0	1.81046	0.186701	1.53153	3.9838	0.0364379	4.77237	4.19177	2.77245	0	2.95249	0	4.4753	6.80951	0.789358
TCGA-78-7155-01	N0	2.16431	0.0226619	0.688913	4.47561	0.0323566	5.46543	3.13212	4.21404	7.31385	3.24128	0.762564	5.01493	0.762564	1.52956
TCGA-78-7161-01	N0	0	0.146833	0.708022	4.19399	0.0159875	5.86571	3.79164	3.34731	0	4.49554	0	4.53304	1.38788	1.03249
TCGA-78-7162-01	N0	1.11536	0.319645	2.01145	4.62537	0.0200918	4.06588	5.61246	3.20972	0	3.53952	0	4.69095	3.1962	2.40413
TCGA-78-7163-01	N0	5.6949	0.452569	2.07827	4.03413	0.934923	5.28542	4.986	2.76073	0	3.22645	0	4.02088	8.91829	0.395116
TCGA-78-7167-01	N0	0	0.111706	2.21716	3.868	0.0180327	3.75111	4.98496	4.14834	0.69887	3.57699	0	4.39254	10.2483	1.12652
TCGA-78-7535-01	N0	0.297741	0.0905906	1.39662	3.8674	0.0136141	7.3472	5.34115	2.39125	0.755018	3.8739	3.27951	3.94812	0.297741	0.95544
TCGA-78-7537-01	N0	0.963282	0.610307	1.76735	4.18322	0.0528783	3.96002	4.1304	3.10867	0.707666	3.92405	0.707666	4.41952	0	1.31744
TCGA-78-7539-01	N0	0.535408	0.0450256	2.01461	4.02232	0.0100452	3.63906	4.40365	3.46031	0	3.17772	0.535408	4.38749	9.0067	2.33018
TCGA-78-7540-01	N0	4.75866	0.0817743	3.1089	4.07596	0.0242864	2.03475	4.77428	2.73315	0	4.06843	1.61589	4.52324	0	1.41031
TCGA-78-7542-01	N0	7.60591	0.0439838	1.06353	4.3342	0.0148525	3.3365	3.64895	2.90949	0	1.95999	2.99276	4.12467	2.07461	2.62121
TCGA-78-7633-01	N0	0.259204	0.0261007	2.06396	4.1895	0.0296353	2.97978	4.49674	3.57198	0.259204	3.8616	0.259204	3.89513	0.669439	1.11144
TCGA-78-8648-01	N0	2.85992	0.392273	1.30312	3.80444	0.00289492	4.60774	4.97271	3.25193	0	4.52282	1.59704	4.57694	0	3.49756
TCGA-78-8655-01	N0	0.284494	0.0458202	2.7996	4.21473	0.539854	6.99603	4.08259	3.64266	0	4.49227	2.23441	4.77199	1.06345	2.16516
TCGA-78-8662-01	N0	7.7053	0.028326	1.58861	3.79392	0.00825145	8.20051	3.60815	3.35887	7.99605	3.65926	0.767644	4.20542	0.303532	2.88231
TCGA-80-5608-01	N0	5.20028	0.261538	1.01721	3.67607	0.911084	2.67928	3.99365	2.91449	0	3.42967	3.34896	3.98549	8.54051	0.940249
TCGA-80-5611-01	N0	6.4824	0.474514	1.67495	3.96041	0.00248879	7.60224	4.17409	3.36546	0	3.08811	1.09568	4.67434	11.1324	1.98089
TCGA-83-5908-01	N0	7.5534	0.03257	0.823512	4.00522	0	6.57816	3.00077	3.78339	0	5.07315	3.70705	4.65927	9.49491	4.2621
TCGA-86-7701-01	N0	1.89562	0.233916	0.481007	4.29177	0.0132952	2.40816	4.88257	3.65172	0	4.62202	1.37136	4.82368	2.46851	2.24373
TCGA-86-7713-01	N0	1.35665	0.0877517	2.04614	4.10605	0.0234482	1.1691	3.77918	4.28167	0.699871	3.89518	1.35665	4.82052	6.20434	1.55722
TCGA-86-7953-01	N0	4.84956	1.5	2.00003	4.40946	0.0121096	8.86164	3.72623	3.07508	0	4.88952	3.16774	4.61423	7.08019	2.49022
TCGA-86-7954-01	N0	2.70161	0.409437	1.25574	3.40059	0.00584106	8.30046	3.88675	3.72617	0	4.17862	0.704142	4.24334	0.210755	2.30043
TCGA-86-7955-01	N0	7.08129	0.988313	1.86399	3.46354	0.00128458	7.34781	4.51194	3.58995	0.344122	4.22069	4.85874	4.47652	1.8851	0.286041
TCGA-86-8056-01	N0	1.96119	0.0809746	3.4983	4.06491	0.0569346	4.42488	5.79101	4.05776	0.531272	4.2365	0.73795	5.03179	1.78602	2.76105
TCGA-86-8073-01	N0	3.00839	0.0627548	2.99351	4.35359	0.0137422	6.36007	5.03342	3.52975	0.513055	3.52924	2.96959	4.40427	1.9962	2.55095
TCGA-86-8075-01	N0	3.25278	0.11692	2.49026	3.97879	0.0220812	6.77948	4.04177	3.79342	0	5.24857	1.38854	4.59324	7.92036	2.22626
TCGA-86-8076-01	N0	2.20436	0.290021	1.78434	4.24103	0.0212573	4.91985	4.32076	3.45771	0	4.03779	2.00262	4.71249	1.92857	2.42109
TCGA-86-8280-01	N0	1.36556	0.524431	2.18951	3.76308	0.682089	6.48519	5.07249	3.52219	0.779648	4.52844	1.44366	4.57117	7.36367	2.88859
TCGA-86-8358-01	N0	2.25754	0.269088	0.866348	4.27607	0.0186351	2.31794	4.21669	4.07036	0.140399	3.65949	0.385851	4.2328	9.76925	1.40744
TCGA-86-8585-01	N0	5.09406	1.1591	0.72444	3.76064	0.00554566	3.33608	2.66809	3.22445	0.206909	3.95007	1.91679	3.93289	2.74543	2.45728
TCGA-86-8668-01	N0	0.519851	0.140723	2.75756	3.45926	0.905875	5.18122	4.39913	3.61866	0	4.38213	0.194846	4.62599	0.901197	2.6831
TCGA-86-8669-01	N0	2.36439	1.28197	0.672014	3.81843	0.00531026	2.36439	3.29366	3.32848	0	3.35523	1.02669	4.36642	4.67136	1.41104
TCGA-86-8672-01	N0	6.30019	0.0230414	1.00473	3.89179	0.00893083	3.52593	3.12711	3.26004	0	3.34739	2.21014	4.6467	3.9035	1.6268
TCGA-86-8673-01	N0	2.25031	0.18983	1.6263	3.82171	0.024631	5.36566	2.85934	2.64064	0	4.39161	1.95369	4.33315	9.18632	0.980297
TCGA-86-A456-01	N0	0.321463	0.126003	2.19697	3.59368	0.0072369	6.33755	4.92825	3.38982	0	3.01182	0.321463	4.20922	0	2.61375
TCGA-86-A4D0-01	N0	4.37481	0.371825	0.564536	4.07118	0.00377752	6.61828	3.64106	3.6077	0	3.48078	1.08252	4.24776	4.26726	1.23854
TCGA-86-A4JF-01	N0	0.687468	0.210394	0.448676	4.17621	0.376117	6.38569	3.3281	3.41485	0	3.76444	2.4533	3.97689	4.27155	1.27882
TCGA-86-A4P7-01	N0	1.10182	0.426186	1.36999	3.95194	0.0403378	6.76484	4.96146	3.80581	0	3.22364	0.967322	4.27915	3.5716	3.04722
TCGA-91-6828-01	N0	0.260946	0.132996	1.54001	4.3012	0.00739288	1.99058	5.79154	3.97915	0	4.09342	0.481843	5.45583	0.673367	2.88069
TCGA-91-6829-01	N0	2.8718	0.0815237	2.0519	3.82978	0.00667753	3.18324	4.63375	3.98806	0	5.47587	0.526985	5.14666	9.36283	2.22905
TCGA-91-6831-01	N0	1.42472	0.141113	1.03033	3.8615	0.00585263	1.74781	3.06705	3.81049	0	4.86476	0.881517	4.78183	5.68758	1.38728
TCGA-91-6835-01	N0	1.66173	0.20533	1.88021	4.12676	0.0458708	3.20525	4.73327	3.88073	0	4.6186	0.51883	4.90279	0.51883	3.62424
TCGA-91-6836-01	N0	1.32523	0.00771746	0.743335	4.7613	0	1.14051	5.4352	3.92282	5.26086	4.18431	0.680137	5.30808	9.73427	1.10577
TCGA-91-6840-01	N0	4.96425	0.259754	0.86954	4.66675	0.0314729	9.63811	4.52994	3.36574	1.52767	4.59759	0.227987	5.05503	0.957244	1.74788
TCGA-91-6847-01	N0	7.81053	0.084644	1.28453	3.68383	0.0044763	2.82646	3.95344	4.01953	0	4.98093	0	4.87375	2.23251	1.16449
TCGA-91-7771-01	N0	0.877186	0.143271	1.59266	4.07832	0.0761619	4.62289	5.60361	3.73664	0	4.21376	0.504258	4.70956	0.274049	3.19191
TCGA-91-8497-01	N0	0.799951	0.402413	2.66302	3.92557	0.431887	4.84745	5.50076	3.40044	0.799951	3.22772	0.245204	4.56718	0.454724	3.1479
TCGA-91-8499-01	N0	0.987747	0.00706198	0.874517	4.33256	0	2.35867	3.40617	3.78014	0	4.01736	1.90791	4.89396	9.90082	2.25032
TCGA-91-A4BC-01	N0	0.996382	0.0789681	0.202461	3.99114	0.00814412	3.85124	3.82477	3.60012	0	3.87074	0.320482	4.59504	5.37663	1.6681
TCGA-93-7347-01	N0	2.60027	0.187326	2.62956	4.25328	0.0707601	5.40038	4.97836	2.95348	0	3.52626	1.96115	4.5405	4.85662	2.80908
TCGA-93-7348-01	N0	1.29139	0.467958	2.29477	3.78751	0.0910224	4.22445	4.47351	3.39417	0	4.46458	0.568075	4.30781	0.40239	1.92216
TCGA-93-8067-01	N0	5.26792	0.0543989	1.64081	4.17632	0.00765544	6.67587	4.42848	3.40372	0	3.91635	0.905193	4.64533	12.0123	1.17675
TCGA-93-A4JN-01	N0	2.34894	0.145653	2.21742	3.84409	0.0534201	4.19704	5.24413	3.53161	0	4.74809	0.784555	4.47881	0.311333	2.21181
TCGA-93-A4JO-01	N0	5.19587	0.420974	2.07334	3.77728	0.0338798	7.71283	5.40149	3.77884	0	2.81163	1.63099	4.2452	0	2.46595
TCGA-93-A4JQ-01	N0	1.98209	0.316457	1.58696	4.00253	0.369935	6.28016	3.94282	3.64364	0.797148	4.23828	2.15135	4.96167	7.72102	2.28729
TCGA-95-7039-01	N0	1.28183	0.0617112	2.37	3.76933	0.036722	5.87031	4.95068	3.05815	0	2.82345	2.58741	4.53571	0	1.58148
TCGA-95-7043-01	N0	1.88746	0.740088	2.46905	4.5956	0.00319799	9.5235	2.5507	3.09539	0	2.66929	6.21696	3.50644	0.79603	0.779423
TCGA-95-7944-01	N0	6.39332	0.0424381	0.121966	3.91306	0.00828205	5.15829	2.69815	3.5634	0	4.78383	2.575	4.65776	3.64004	1.83171
TCGA-95-7947-01	N0	7.314	0.0799031	2.09426	4.91431	0.00735065	7.04731	3.07969	3.85595	0	4.41505	2.00521	4.07748	1.54513	1.8877
TCGA-95-7948-01	N0	1.22125	0.37073	3.66327	3.48924	1.2855	8.24294	4.11275	3.6549	0.373937	2.99232	0.670631	4.71547	0	1.19901
TCGA-95-8039-01	N0	1.10005	0.117766	2.21565	4.27259	0.00484604	7.2075	4.68772	3.35551	0	3.39758	2.424	4.09192	8.46915	2.38109
TCGA-97-7546-01	N0	0.216316	0.391476	2.62242	4.65873	0.464278	6.2398	5.38139	3.89178	0	4.08221	0	4.89445	8.73892	3.39122
TCGA-97-7547-01	N0	0.287153	0.0524599	2.99167	3.88016	1.46761	4.525	5.1082	2.95442	0.287153	4.13234	0.526529	4.50466	6.82982	2.0875
TCGA-97-7552-01	N0	0.810901	0.320336	3.26526	4.40453	0.283358	3.6223	5.19398	3.64446	0	4.20093	1.32689	5.14151	0	3.32304
TCGA-97-7553-01	N0	2.27846	0.382875	2.67525	4.30144	0.0240829	4.59154	5.81455	3.77455	0	4.09287	1.14815	4.72169	0.491015	4.09057
TCGA-97-7937-01	N0	1.31284	0.374974	2.46228	4.08965	0.00504723	7.93149	5.41476	3.79625	0	4.28106	1.31284	4.37435	1.47568	1.22873
TCGA-97-7938-01	N0	0.299714	0.156784	3.23033	4.45727	0.0577935	4.54827	4.86175	4.25437	0	3.44569	0	4.66993	0	2.60219
TCGA-97-7941-01	N0	8.25362	0.0959596	2.50604	3.83072	0.037772	5.71746	5.64645	3.34742	0	4.02441	0.884543	4.61544	7.32076	2.29272
TCGA-97-8172-01	N0	0.873127	0.518047	2.98353	4.14537	0.335984	6.06855	5.42836	3.94187	0	3.42438	0.501633	4.99281	3.72972	3.35497
TCGA-97-8174-01	N0	1.62935	0.151388	2.46125	3.85677	0.0371683	3.99596	5.18618	3.66981	0	3.11661	0.201073	4.41327	0.534717	3.19415
TCGA-97-8175-01	N0	4.78204	0.110535	1.93238	3.70066	0.248607	6.269	5.01224	3.12008	0	4.2716	2.23454	4.42174	1.58285	1.8175
TCGA-97-8177-01	N0	1.01865	0.34424	2.00714	3.82135	0.418673	5.16529	5.02847	3.47892	0	3.64825	0.910306	3.93148	1.38533	2.3509
TCGA-97-8179-01	N0	1.68433	0.242645	1.84921	3.86337	0.0605325	3.94396	4.93663	3.76754	0	2.98052	0.827711	3.79802	1.78043	1.58962
TCGA-97-8552-01	N0	2.37608	0.25594	2.62629	3.51318	1.1157	6.03386	5.40883	3.45262	0	2.90852	0.465737	3.99826	0.326556	2.71012
TCGA-97-A4LX-01	N0	0.705421	0.189016	1.30939	4.12478	0.0319421	4.81335	4.53921	3.5841	0	3.91184	1.6813	4.37781	1.36544	3.21165
TCGA-97-A4M0-01	N0	0.550333	0.089442	2.31762	4.27947	0.247603	5.66812	4.94124	3.53366	0	4.03779	0.947739	3.76976	1.25898	2.27478
TCGA-97-A4M1-01	N0	0.28252	0.439503	1.90794	4.47626	0.0605791	6.46585	5.28165	3.75232	0	3.26655	0.518672	3.82999	0.721551	2.58299
TCGA-97-A4M2-01	N0	1.2897	0.353365	1.79028	3.99195	0.0227	5.22806	5.31708	3.67328	0	2.73058	0.444871	4.2082	2.08771	3.12742
TCGA-97-A4M3-01	N0	1.31711	0.0343634	2.08487	4.06033	0.157759	2.96699	3.95357	3.34264	0	4.08379	0.278691	4.25815	0	1.65261
TCGA-97-A4M5-01	N0	1.09785	0.11556	2.60468	4.00477	0.0201091	4.16312	5.00642	3.8316	0	3.57038	0.251033	4.47663	7.70421	3.02118
TCGA-97-A4M6-01	N0	3.70237	0.889518	2.01101	3.68267	0.110259	8.45046	4.78064	3.68043	0.209229	4.46518	0.209229	4.13125	0	2.54077
TCGA-97-A4M7-01	N0	1.53023	0.215248	1.97509	3.6831	0.623146	5.43903	4.59707	3.80841	0	4.60194	0.704375	3.98674	0.274784	2.74844
TCGA-99-7458-01	N0	1.61873	0.302899	2.75752	4.37327	0.189514	4.86063	5.15155	3.47619	0	4.31175	0.646009	4.81597	0	2.79271
TCGA-99-8028-01	N0	2.46249	0.130177	1.08716	4.03561	0.00997397	3.61814	4.64714	3.04406	0	3.78047	2.77929	4.59259	1.48783	3.14007
TCGA-99-8032-01	N0	2.22822	0.111758	0.602757	4.3607	0.0339585	3.87669	3.83768	3.3803	0	4.51057	0.610236	4.50418	5.81464	1.09538
TCGA-99-AA5R-01	N0	1.12216	0.527227	2.27931	4.11373	0.0258363	4.61675	5.72739	3.42323	0	2.52594	0.83551	4.36441	0.258365	3.14885
TCGA-J2-8194-01	N0	0.652086	0.0781776	2.33588	4.14765	0.067121	5.98383	4.08441	3.95061	0	3.68273	1.09955	4.84523	3.25876	1.85111
TCGA-J2-A4AD-01	N0	5.04337	0.0615082	3.27479	3.54797	0.00833348	5.67875	4.87505	3.78596	0	4.03002	2.85923	4.33925	10.9493	1.44147
TCGA-J2-A4AE-01	N0	2.08609	0.47533	2.00383	4.24842	0	5.37763	4.6668	3.97223	0.345393	3.28606	0	4.19321	1.05796	2.61335
TCGA-J2-A4AG-01	N0	0.429768	0.295066	2.53986	3.91484	0.00489585	6.06091	5.46635	3.58001	0	4.7052	2.26819	4.50992	5.27245	2.99065
TCGA-L4-A4E5-01	N0	5.59463	0.0413544	1.13775	4.24232	0	7.38175	3.32107	3.71994	0	3.92434	0.367732	3.97487	0.367732	1.32597
TCGA-L4-A4E6-01	N0	0.98872	0.520574	1.83813	4.12053	0.0300359	4.83612	5.4608	3.36772	0	2.8204	1.30838	4.17589	3.22768	3.70598
TCGA-L9-A443-01	N0	1.27094	0.148997	2.11543	3.76398	0.147543	5.91538	4.77897	3.35034	0	3.62777	0.234684	4.11742	0	1.88379
TCGA-L9-A444-01	N0	1.37875	0.119305	1.54195	3.62576	0.00563284	1.90443	3.96351	3.50285	0	2.94381	1.09974	4.56345	4.32024	2.59174
TCGA-L9-A8F4-01	N0	1.69483	0.379924	0.890515	3.73611	0.0106051	5.65026	3.80102	3.90892	0	3.85193	2.60525	4.95989	0.267115	2.33467
TCGA-MN-A4N4-01	N0	3.71036	0.0449946	1.01311	3.52501	0.00976032	6.40579	3.41081	3.9395	0	5.07906	2.59392	4.29319	5.74299	1.53937
TCGA-MN-A4N5-01	N0	1.27185	0.0934072	1.28428	4.10152	0.0160923	7.53699	3.3525	3.5873	0	3.50439	2.14917	4.41874	0.489752	1.76131
TCGA-MP-A4SV-01	N0	1.40533	0.159392	1.25276	4.18951	0.102959	7.15448	3.83069	4.06106	8.17267	3.85813	2.3095	4.69871	7.46026	2.11706
TCGA-MP-A4T7-01	N0	6.59229	0.131813	2.04582	3.63023	0.0173496	3.74562	4.13162	3.32393	0	3.29799	1.54091	4.05433	0	2.40239
TCGA-MP-A4TA-01	N0	4.98811	0.349092	0.748662	3.69685	0.00360105	5.19725	2.56698	3.70989	0	4.70113	3.17718	4.0507	8.17793	1.43804
TCGA-MP-A4TE-01	N0	0.267457	0.0772456	0.460894	3.21037	0	1.39477	4.03716	2.95385	0	4.99088	0.493	4.67812	4.98897	0.362192
TCGA-MP-A4TF-01	N0	0.265205	0.0764687	1.02591	4.361	0.0766797	2.5468	2.8125	4.31414	0	4.02691	1.27062	3.72919	9.89988	1.08299
TCGA-MP-A4TH-01	N0	3.52174	0.666837	2.24987	4.00896	0.0363788	4.47151	5.19452	3.69128	0	3.14668	0	4.60356	0.279757	2.65938
TCGA-MP-A4TJ-01	N0	2.70002	0.299042	1.47398	4.1301	0.0188638	4.33937	4.42762	3.87	0	4.24087	1.40568	4.60871	0	3.37251
TCGA-MP-A5C7-01	N0	1.09765	1.26714	2.09489	4.10072	0.0431746	3.27269	4.17876	3.95313	0	3.71265	0.296325	4.54523	0	0.745359
TCGA-NJ-A4YF-01	N0	1.37797	0.242158	0.370016	3.83089	0.00965315	5.03352	3.38125	2.99598	0	3.7524	4.10591	3.82341	5.84928	0.492001
TCGA-NJ-A4YG-01	N0	0.95462	0.130061	1.41829	3.99513	0.0345796	5.82309	5.52733	3.52824	0	4.1934	1.30691	4.11583	0.487517	1.72539
TCGA-NJ-A4YP-01	N0	3.84654	0.0494438	1.11471	4.06324	0.0813063	5.54868	4.37694	3.94381	0	4.59509	1.31456	4.59231	0.673474	1.13036
TCGA-NJ-A4YQ-01	N0	3.34642	0.186249	0.695096	4.02318	0.0103601	3.75555	3.27965	3.49327	0	3.30749	1.25676	3.95942	0	2.45772
TCGA-NJ-A55A-01	N0	2.8966	0.467149	2.48766	4.23289	0.0507974	5.68517	4.45751	4.12988	0	3.82447	0.356473	4.61986	0	3.38936
TCGA-NJ-A55R-01	N0	3.717	0.156046	1.37403	4.02153	0.0483609	4.33415	4.53335	3.35524	0	4.32527	0	3.98145	9.77046	1.21809
TCGA-O1-A52J-01	N0	0.600982	0.190925	2.29019	3.3911	0	7.67483	5.00597	2.69556	0	4.01173	1.61683	3.71839	8.40054	2.07773
TCGA-S2-AA1A-01	N0	4.63257	0.361513	1.8726	3.76824	0.0186792	2.61869	4.81575	3.44901	0.251497	3.86932	0	4.46701	0.465592	3.66563
TCGA-05-4250-01	N1	8.73751	0.00531515	1.20574	3.67162	0.00273589	5.64432	4.49683	3.22243	0	3.55637	2.83329	4.69326	0.689478	2.62004
TCGA-05-4396-01	N1	3.52729	0.293458	3.05049	4.43166	0.00317427	5.21034	4.90176	3.6837	0	5.40301	0.636168	4.94363	12.4089	1.20582
TCGA-05-4397-01	N1	5.16137	0.141609	0.338323	4.05251	0.00182075	8.67336	4.37614	3.58218	0	4.28968	2.79478	3.65963	10.4661	1.09352
TCGA-05-4427-01	N1	0	0.0296083	1.98567	5.02371	0.00920106	5.01143	4.2053	3.62998	0	4.58618	0.731449	5.69418	7.97554	1.92901
TCGA-05-4432-01	N1	3.09916	0.566197	0.766035	3.73206	0.035775	2.50028	4.29422	3.37423	0	5.20038	3.28298	4.59457	5.95735	1.72248
TCGA-05-4434-01	N1	5.63729	0.129732	1.57373	3.99941	0.0184155	6.46254	4.39447	3.41467	0	3.44783	1.58706	4.73602	2.22486	2.56431
TCGA-05-5423-01	N1	1.0743	0.192729	1.3837	4.04524	0.0673305	6.35255	5.06219	3.0517	0	2.47255	1.01482	3.86171	0.952777	2.76217
TCGA-05-5425-01	N1	0.931761	0.112228	1.39497	4.03812	0	4.3585	3.20629	3.90638	0	4.27575	0.931761	4.15237	4.42096	2.47815
TCGA-05-5428-01	N1	1.23267	0.0393317	0.776328	3.55491	0.0139137	2.3363	2.69076	3.37334	0	2.0069	2.23651	3.94518	1.67527	1.37173
TCGA-38-4627-01	N1	4.21856	0.109126	1.05862	3.76639	0.69444	4.65006	4.47817	2.61692	0	4.79368	0.94652	4.82235	8.68565	2.43677
TCGA-38-4628-01	N1	0	0.0935556	1.32331	3.62956	0.00572411	5.78514	3.29552	2.55124	0	3.87501	0.568937	4.39378	1.55273	1.98493
TCGA-38-4632-01	N1	5.03471	0.0352148	0.969526	3.93064	0.00609805	5.77615	4.08017	2.74768	0	2.13937	3.38929	4.01589	1.81101	1.83007
TCGA-44-2659-01	N1	2.48328	0.112568	3.025	4.21077	0.629975	6.95027	4.74167	3.48158	0	3.30804	1.85751	4.68992	9.13738	2.46624
TCGA-44-2665-01	N1	6.22766	0.161424	1.08838	4.06347	2.1733	4.64809	4.5638	3.22112	0	4.22429	3.55423	4.70722	9.61041	1.9089
TCGA-44-6779-01	N1	0.827069	0.021746	0.147581	4.13603	0.0134587	8.23031	3.80537	3.08771	0	5.21009	2.68224	4.43895	0.331162	2.52988
TCGA-44-7669-01	N1	3.4754	0.224839	1.20905	3.95129	0.00683375	2.71172	5.19836	4.20743	0	4.87759	0.407658	4.408	0.407658	2.37322
TCGA-44-7670-01	N1	0.443537	0.213149	3.17897	3.56046	0.00664604	5.36851	4.41422	3.79039	0.782297	3.95518	0.782297	4.34515	1.95586	1.52333
TCGA-49-4505-01	N1	1.19273	0.0462818	1.9964	3.82118	0.0297526	5.35267	4.22539	2.61168	0	3.89263	1.83662	4.33757	1.65218	2.22551
TCGA-49-4506-01	N1	6.52147	1.28198	0.219453	3.7936	0	2.90506	1.76965	2.75595	0	3.22253	1.84647	3.17221	3.50903	1.13758
TCGA-49-4507-01	N1	1.24497	0.114306	0.0443153	4.16887	0.00247798	5.04308	2.11038	2.75864	0	3.76115	2.21838	3.87953	1.49919	1.35863
TCGA-49-4510-01	N1	1.55695	0.152863	1.55751	3.47065	0.0127022	4.35214	4.14388	3.10276	0.404598	2.14277	0.720226	4.54246	7.19647	1.465
TCGA-49-6742-01	N1	3.17261	0.121301	1.9396	4.16459	0.0199594	4.89806	3.92051	2.99759	0	4.0653	1.66297	4.27348	8.26789	1.01434
TCGA-49-6744-01	N1	2.5426	0.176924	2.47863	4.12837	0.0312254	4.78372	5.6548	3.15585	0.402458	4.51656	2.18248	4.74221	3.01412	2.63995
TCGA-49-AAQV-01	N1	1.96596	0.268268	0.816003	3.73819	1.13651	6.65705	3.00937	2.96976	0	4.02023	2.09426	4.00003	0.240827	1.04645
TCGA-49-AAR3-01	N1	6.72773	0.0777392	0.685092	3.65285	0.0036198	6.11962	3.26284	3.20342	0.241557	2.86099	2.15804	4.11901	0.789997	2.68346
TCGA-50-5044-01	N1	7.38789	0.0368713	0.536975	3.80941	0.0253838	5.73196	4.20807	2.23839	0	3.21682	1.25963	4.47184	0.354868	1.27722
TCGA-50-5045-01	N1	2.97662	0.154684	1.21677	4.0816	0.138472	3.09904	4.11915	2.97027	0	3.1198	2.57997	4.32317	2.40113	2.64151
TCGA-50-5055-01	N1	3.90254	0.572862	1.7375	4.08067	0.0236887	4.74606	3.91024	2.96383	0	4.12913	1.09185	4.68255	8.3086	2.89762
TCGA-50-5068-01	N1	2.25847	0.143301	1.79076	3.91272	0.0794405	4.03227	4.01444	3.03963	0	2.15794	1.91951	3.74081	0.41571	2.32637
TCGA-50-5932-01	N1	2.96551	0.0408812	2.5843	3.84434	0.0233791	5.0265	5.36932	3.88286	0	2.95827	1.52976	3.87088	0.864416	1.75826
TCGA-53-7626-01	N1	0	0.221987	2.88093	4.52622	0.013512	5.58262	5.23866	3.50805	0.233567	4.1599	0.434536	4.59082	0	3.35149
TCGA-53-A4EZ-01	N1	4.77338	0.311605	1.99238	3.96119	0.00484083	3.68143	2.78114	3.55753	0	3.35801	1.3858	4.04197	0.343533	0.573663
TCGA-55-1596-01	N1	2.9003	1.09622	0.432746	3.7598	0.00248104	4.74756	1.98879	3.48292	0	4.01437	4.8589	4.29703	4.00781	0.943981
TCGA-55-5899-01	N1	1.96034	0.969488	1.28283	4.53937	0.0202652	4.39839	3.0647	3.30502	0	3.03794	0.685936	4.22965	9.80761	1.97558
TCGA-55-6712-01	N1	2.90319	0.0384858	1.98801	3.68681	0.12666	7.79104	3.65329	2.91476	0.344865	2.75982	1.46216	4.73081	0.959854	2.48205
TCGA-55-6979-01	N1	5.15488	0.21229	1.22119	4.38314	0.0271197	6.02401	4.5805	3.31159	0.670756	4.03355	1.81377	4.86118	1.12685	2.92975
TCGA-55-6982-01	N1	4.90971	0.110136	2.76822	3.54827	0.0670837	6.68751	5.04449	3.17336	0	4.67487	2.55675	3.8869	9.89685	2.08337
TCGA-55-6983-01	N1	5.10098	0.523622	1.75578	4.36464	0.492489	3.76367	5.03306	3.07926	0.158988	4.17745	1.39564	4.78569	1.63091	2.09645
TCGA-55-6984-01	N1	8.9417	0.106107	2.1878	3.69481	0.155345	6.28215	3.84619	3.21848	0	4.80449	3.06206	4.49852	0.795071	2.57649
TCGA-55-7227-01	N1	0	0.0811957	2.69747	4.2381	0.0260139	4.73103	6.28785	2.94646	0	3.96446	0.26077	4.77921	0.672972	2.43625
TCGA-55-7907-01	N1	3.0396	0.0999264	2.07833	3.66991	0.00318914	6.27724	5.66366	3.35436	0.567067	3.17214	3.0396	4.2746	0	2.1058
TCGA-55-7914-01	N1	0.355997	0.0628586	1.05693	3.82871	0.119862	2.12381	3.0418	3.42735	0	3.3395	1.56515	3.96446	0.355997	1.4897
TCGA-55-8508-01	N1	3.44928	0.205566	0.641046	3.65248	0.00362161	4.60479	4.53338	3.43095	0	3.65757	0.851646	5.11019	1.05154	1.15532
TCGA-55-8512-01	N1	3.53897	0.466747	2.21397	3.61701	0.0806042	4.10479	4.28456	3.90004	0	3.48543	0	4.2375	1.05683	2.6845
TCGA-55-8620-01	N1	3.86809	0.0329241	0.316805	4.39725	0.0153323	2.21014	4.53103	3.58841	0	3.51786	0.539431	4.33119	9.31156	1.97788
TCGA-55-A48X-01	N1	2.14181	0.265471	1.87373	4.25379	0.0171925	6.15298	4.90222	3.81671	0	4.29354	0.962065	4.41489	0.2505	2.21806
TCGA-62-A471-01	N1	0	0.0182293	1.0001	3.8711	0.00403763	5.53176	2.62776	3.76259	0	4.68205	3.63522	3.76847	6.96488	0.859436
TCGA-64-5815-01	N1	0.40917	0.0600034	0.743055	3.9818	0.0579015	6.08874	4.42253	2.69521	0	4.7181	1.64685	4.20607	0	2.43407
TCGA-67-6217-01	N1	1.71567	0.147936	2.52201	4.04166	0.0229275	5.99085	5.6533	3.55965	0	4.27248	0.204516	4.12904	10.6029	2.36466
TCGA-69-7978-01	N1	6.28796	0.0294805	0.564834	4.08137	0.0185479	7.46376	4.47798	3.44596	0	4.14502	1.6318	4.60183	6.28796	2.66227
TCGA-69-8253-01	N1	2.91437	0.0900445	1.72465	4.47637	0.535379	4.98091	4.03475	3.08772	0	3.90148	0.823172	4.15051	1.80744	1.26688
TCGA-73-4675-01	N1	1.45989	0.298442	2.18862	3.42194	0.317515	4.46012	3.92866	2.46198	0	3.45124	1.8585	3.53908	2.83351	1.23819
TCGA-73-4676-01	N1	1.85161	0.127224	0.994891	3.84968	1.00326	5.34014	4.8176	2.82217	0	4.37113	1.9934	4.14614	1.63788	1.92986
TCGA-75-5125-01	N1	4.54565	0.0265978	0.871532	3.59866	0	6.83528	3.91604	3.28763	0	3.79738	3.06303	5.06521	3.89391	2.4826
TCGA-75-6212-01	N1	0.675064	0.47051	1.94301	3.88178	0.494165	5.73088	5.07454	3.02059	0	4.39413	0.483135	4.52147	0.261698	2.01187
TCGA-78-7145-01	N1	0.61008	0.044362	2.18749	3.92881	0.0553962	6.3739	4.26533	3.30861	0.233211	3.28346	1.15584	5.11264	1.03751	1.5033
TCGA-78-7147-01	N1	3.12557	0.238982	1.63297	3.80905	0.0112745	6.60193	4.6644	3.4747	0	4.91205	0.335655	4.17059	6.36802	1.44774
TCGA-78-7148-01	N1	2.75801	0.272921	1.91429	4.08422	0.00193009	3.50797	4.52606	3.12875	0	3.68958	0.656692	4.35368	8.57976	1.45398
TCGA-78-7150-01	N1	1.29082	0.0880066	1.67712	4.16147	0.0116202	5.5898	2.58895	3.26097	0	5.38007	0.901494	4.40176	3.27501	0.907454
TCGA-78-7156-01	N1	0	0.54643	1.81208	4.31774	0.0278102	3.79717	5.0494	3.59551	0	2.86509	0	4.47689	4.79309	1.24767
TCGA-78-7166-01	N1	3.2922	0.160496	1.0162	3.64013	0.00408662	4.81827	1.99014	2.65456	0	3.23735	0.632037	3.70656	0.350357	0.617505
TCGA-78-8640-01	N1	5.71757	0.207324	1.0157	3.73311	0.00979494	4.78816	2.92774	3.63351	0	3.61578	4.67703	3.96927	0	1.60469
TCGA-78-8660-01	N1	1.16191	0.0481566	1.09246	3.46372	0.00941309	5.1807	3.73343	2.95798	0.270536	3.65172	3.20949	4.40021	0.694896	2.0917
TCGA-80-5607-01	N1	4.61739	0.074582	1.78577	4.19198	0.324682	6.23304	5.45977	2.74068	0	3.79793	2.48717	4.67252	0.596326	2.26545
TCGA-86-6562-01	N1	1.89476	0.201185	1.97251	4.24934	0.0212547	6.58396	5.02603	3.23094	0	5.80702	1.27123	4.383	0.283908	1.97387
TCGA-86-6851-01	N1	4.37772	0.0820989	2.20236	4.04536	0.0112353	6.40907	3.56148	4.01434	2.60118	4.10001	2.65745	4.54561	8.19952	3.11726
TCGA-86-7711-01	N1	3.53849	0.218139	0.754856	3.62081	0.0107164	5.84154	3.90136	3.29188	0.37294	4.97611	1.98181	3.94472	7.75323	2.69288
TCGA-86-8054-01	N1	3.98023	0.356008	1.46389	4.43298	0.0126293	2.97647	4.77205	4.18555	0	3.91571	0	4.49423	1.52296	1.11306
TCGA-86-8055-01	N1	3.9618	0.109981	2.02303	3.70138	0.217791	6.47355	4.17792	3.36234	0	4.83126	0.642325	4.72174	10.2113	2.15822
TCGA-86-8074-01	N1	5.54601	0.0282103	2.28763	4.22614	0.0218102	2.79537	3.51356	3.73151	0.220403	5.33247	1.65341	4.57825	4.1161	1.55253
TCGA-86-8278-01	N1	0.438273	0.471103	2.42308	4.14612	2.59407	6.60288	5.01762	3.63877	0.161342	4.18005	1.98484	4.45154	3.11956	1.52075
TCGA-86-8279-01	N1	1.5326	2.09853	2.67731	3.51856	0.0148503	6.18858	5.24796	3.87827	3.42436	4.83552	1.39102	4.74394	2.48478	1.10316
TCGA-86-8671-01	N1	3.6337	0.429474	2.07615	4.04182	0.248178	4.57439	4.8438	3.43837	0.332704	3.6963	1.7374	4.80846	3.04656	3.36611
TCGA-86-8674-01	N1	1.89845	0.180575	2.21637	4.04	0.147538	5.52115	4.94976	3.21819	0.241077	4.15744	0.788687	4.3584	0.788687	0.419278
TCGA-91-6830-01	N1	4.77268	0.196903	1.59699	3.94103	0.0290009	5.75627	5.20598	3.62572	0.172773	4.17574	1.40811	4.42338	2.74954	2.80174
TCGA-91-A4BD-01	N1	0.263795	0.0559248	2.40283	3.99928	0.0261543	4.81175	4.46102	3.05479	0	2.20361	0.48673	3.26938	0	2.34162
TCGA-95-7562-01	N1	4.45137	0.0980711	1.57229	4.57742	0.00807567	3.59951	4.68568	3.0424	0	4.87349	1.24234	5.11336	0.475327	1.46632
TCGA-95-7567-01	N1	0.843436	0.025099	1.60453	4.4995	0.00243932	5.21496	4.90694	3.24137	9.3743	3.38922	1.75828	4.39132	0.674225	1.51822
TCGA-95-8494-01	N1	2.06445	0.00351539	0.306576	3.89535	1.04233	7.28338	4.14438	2.96529	0	3.33463	2.50852	3.85507	1.22657	1.40495
TCGA-95-A4VN-01	N1	0.76168	0.098157	0.89446	4.14759	0.00381712	4.12592	3.79696	3.49141	0	3.70164	2.23546	4.89885	0.300793	2.22091
TCGA-97-8176-01	N1	6.17286	0.0283397	1.58661	3.8286	0.0122135	6.12416	3.84037	3.20651	0.424438	4.29472	2.69439	4.45474	9.73879	1.49136
TCGA-J2-8192-01	N1	2.57541	0.534649	2.47145	3.81654	1.95676	6.51287	4.70444	3.5282	0.271047	4.75473	1.61675	4.77772	9.28383	2.98308
TCGA-L9-A50W-01	N1	0.254838	1.48708	2.27327	3.8993	0.0599767	5.8482	4.0265	3.16188	0	3.67002	1.5519	3.80033	0	1.28732
TCGA-L9-A743-01	N1	1.94738	0.116151	2.29333	4.00676	0.0602657	6.07924	4.84241	3.44435	0.176133	4.06751	2.04139	4.58004	0	2.65229
TCGA-L9-A7SV-01	N1	0.675118	0.0799606	2.06908	4.10469	0.0110567	6.00122	3.87622	4.27482	0	2.75313	0.261722	4.11357	4.61302	1.46046
TCGA-MN-A4N1-01	N1	1.32447	0.0266193	1.28828	3.19563	0	4.61877	3.95002	3.06909	0	4.32327	1.58778	4.13142	0.586373	0.664087
TCGA-MP-A4SW-01	N1	0.320661	0.0981238	1.52388	3.6592	0.0198993	6.9767	4.39013	3.32876	0	3.08075	1.58074	3.73657	7.3774	1.96509
TCGA-MP-A4SY-01	N1	2.15466	0.133153	1.3771	3.47539	0.194442	6.70528	5.20589	3.48404	0.298866	4.21561	0.941637	4.6395	0.298866	2.10472
TCGA-MP-A4T4-01	N1	1.76246	0.0555315	1.18679	3.92648	0.0185965	6.28547	3.4712	3.28959	0	3.43561	1.45428	4.53689	0.5211	2.2783
TCGA-MP-A4TI-01	N1	6.10556	0.132004	0.908115	3.80617	0.0248746	5.84365	4.69274	3.54813	0	4.08529	2.55198	4.45212	0.31408	3.20252
TCGA-MP-A4TK-01	N1	4.24426	0.0580491	1.68655	3.78886	0.166788	7.12396	4.39072	3.21228	0.36171	4.38122	2.86173	4.42221	8.08739	2.35083
TCGA-NJ-A55O-01	N1	1.84	0.198115	2.17496	4.11614	0.10253	4.23467	4.82524	3.37687	0	4.16422	0.768641	3.83501	4.76925	2.02336
TCGA-NJ-A7XG-01	N1	0.981311	0.0295966	2.78736	3.62696	0.561667	6.91833	5.14838	3.46583	0	3.13083	0.889454	4.08016	1.14914	0.537714
TCGA-05-4244-01	N2	3.20984	0.0403783	1.26462	3.82188	1.48453	8.46396	4.42479	3.54388	0	3.3938	3.58536	4.023	0	1.73137
TCGA-05-4384-01	N2	0.557734	0.298871	1.84078	4.3038	0.0442116	3.47859	5.35068	3.47411	0	3.87233	0.160906	4.62115	0.437192	2.66473
TCGA-05-4395-01	N2	7.18264	0.0269179	0.0980138	3.68112	0	6.9416	1.70102	2.4765	0	3.77451	2.13314	3.8076	9.97661	1.19526
TCGA-05-4415-01	N2	7.12919	0.293596	0.275735	3.9698	0	2.8527	3.32958	3.4061	0	2.96665	5.5752	4.89438	6.68887	0.970502
TCGA-05-4418-01	N2	2.77215	0.0759973	0.793186	3.69849	0.00120343	4.10417	2.41921	3.23971	0	3.64384	3.1334	4.10905	8.42521	1.33661
TCGA-05-5420-01	N2	2.64123	1.14079	0.530317	4.16417	0.00330752	3.66008	2.69448	3.31054	0	2.37507	2.59565	4.04325	8.64564	3.00546
TCGA-05-5429-01	N2	7.85085	0.0300004	1.84132	3.95004	0.488724	4.64472	3.52459	3.29924	0	4.13138	0.817523	4.46584	1.03441	2.70652
TCGA-35-5375-01	N2	1.84978	0.492585	0.113171	3.77459	0	9.10083	2.56476	3.42231	0	3.56381	0.647253	3.1233	1.37034	1.43093
TCGA-38-6178-01	N2	1.56929	0.148635	2.14964	4.55242	0.29167	6.20556	4.55442	3.67398	0	4.86107	0.478732	4.26878	3.01495	1.77168
TCGA-44-3396-01	N2	1.95368	0.0613688	1.19812	4.117	0.0028988	5.20634	4.58491	3.31188	0	4.54483	5.83379	4.7639	5.68056	2.65604
TCGA-44-5643-01	N2	1.07914	0.0438085	1.59364	4.71419	0.319653	7.13789	2.3133	3.18961	0	4.92582	1.84658	4.19234	0	1.65346
TCGA-44-6774-01	N2	3.61464	0.109796	0.663961	3.59961	0.0174942	4.31312	4.0992	3.08136	5.41836	5.50717	1.2764	4.8297	3.97642	1.64474
TCGA-49-4490-01	N2	0.738062	0.107771	1.76539	3.74176	0.105599	6.18725	3.87139	2.53664	0.180895	4.31066	0	4.39091	0.48621	1.02208
TCGA-49-4494-01	N2	7.10269	0.319923	1.24029	3.88001	0.226797	5.83016	4.60996	2.64015	0	3.97948	2.92136	4.37503	10.1668	1.34112
TCGA-49-4512-01	N2	0.968689	0.186659	1.29553	3.74533	0.48694	6.56183	4.37525	2.57377	0.213515	3.84773	1.54306	4.3123	1.37579	1.47183
TCGA-49-6743-01	N2	3.81197	0.238593	0.704287	3.93268	0.00680712	6.40622	4.58533	3.39466	0	3.78934	3.19425	4.37761	8.55224	2.07915
TCGA-49-6745-01	N2	2.47694	0.0808496	1.31943	4.34525	0.0205462	4.62598	4.20424	3.13195	0	4.32744	2.47694	4.88703	0	2.33186
TCGA-49-6761-01	N2	1.97019	0.0842769	0.966666	4.10798	0.00278683	7.08174	3.26882	3.13858	0	3.36301	3.2181	5.28462	8.52408	1.44184
TCGA-49-AAR4-01	N2	1.96079	0.0349409	1.6639	3.42442	0	5.09873	3.52599	2.89435	0	3.94002	3.83025	4.13994	10.1471	2.20232
TCGA-50-5051-01	N2	1.97922	0.295557	0.845889	4.30732	0.00831764	2.35612	4.97279	3.05095	0	3.66991	0.795518	4.68197	1.38876	0.704884
TCGA-50-5072-01	N2	0.447081	0.0853223	1.01456	3.76838	0.00548715	3.97387	3.57159	3.40396	0	4.66562	3.94012	4.47028	6.43852	1.5647
TCGA-50-5930-01	N2	5.95705	0.88164	1.87961	4.08555	0	3.03403	3.7419	3.33783	0.238509	4.32961	1.95471	4.68081	10.4057	2.01639
TCGA-50-5933-01	N2	1.86127	0.0842928	2.20544	3.98091	0.0199499	6.16308	4.58825	3.4974	0	4.1338	1.3426	4.92333	0.286218	2.39113
TCGA-50-5936-01	N2	6.15869	0.625118	1.26093	3.67535	0.0224185	3.88934	3.94127	3.66668	0	3.86478	1.81877	4.38058	2.67641	1.41211
TCGA-50-5941-01	N2	4.19025	0.237283	2.34466	4.25198	0.00265031	5.37642	4.51691	3.31845	0.603824	3.77483	2.63166	4.71424	0.952729	2.87081
TCGA-50-6593-01	N2	1.94795	0.111808	2.38768	3.73697	0.0313096	4.81092	4.18903	2.94645	0	3.92978	1.22962	4.36915	0.224203	2.37391
TCGA-50-6594-01	N2	6.21123	0.00391634	0.735176	3.64791	0.0794522	9.08991	2.36576	3.81042	0	2.16779	4.64328	4.23458	4.60392	1.00505
TCGA-50-6595-01	N2	5.71982	0.0204573	0.410041	4.32752	0.0105569	4.31264	4.21567	2.99366	0	4.49536	2.28621	4.5569	5.47348	2.09595
TCGA-55-1594-01	N2	2.04746	0.0357834	0.591474	3.86272	0.00523092	3.05522	2.73059	4.03014	0	5.31758	2.04746	4.45881	7.08483	1.58188
TCGA-55-6970-01	N2	5.62656	0.344924	2.50323	4.15581	0.0149512	4.25419	4.97471	4.01034	0	4.02281	0.994466	4.50848	5.84432	2.72641
TCGA-55-6981-01	N2	4.15242	0.191693	1.82769	3.33854	0.083782	7.11499	4.14743	2.89837	0	5.26131	1.28601	4.36792	3.31482	1.46439
TCGA-55-7283-01	N2	0.299098	0.259643	1.93911	3.99757	0.0157299	5.87833	5.70648	3.49312	0	3.6586	0.546708	4.90788	0.942232	1.98097
TCGA-55-7727-01	N2	0.87211	0.172557	2.10876	4.84399	0	4.61625	4.57119	3.81555	0	3.3974	1.25332	5.07226	2.11148	2.07321
TCGA-55-8505-01	N2	1.29337	0.306627	1.42589	3.31531	0.00723553	4.76118	3.61456	3.37258	0	4.87553	1.59998	4.77891	2.7035	1.0249
TCGA-55-8615-01	N2	3.47744	0.0788918	0.483262	3.38781	0.00215538	2.30806	4.09059	3.40274	0	4.54971	0.894654	4.33357	8.01349	0.770566
TCGA-62-8394-01	N2	4.07298	0.0803284	1.74197	4.14491	0.058865	6.40034	3.82567	3.15102	0	4.5263	1.19862	3.79204	7.61046	1.45779
TCGA-62-8398-01	N2	4.39564	0.119535	1.2857	3.42503	0.0138884	4.89414	3.13607	3.56438	0	4.39985	1.69046	4.29961	2.89918	1.52513
TCGA-62-8399-01	N2	0.705385	0.0242836	2.86991	4.62449	0	6.06384	4.40743	4.05458	0	2.29112	1.53194	4.09178	10.3185	1.85908
TCGA-62-8402-01	N2	3.12164	0.0406913	1.058	3.72017	0	1.95937	2.82834	3.82894	0	5.00743	1.62595	5.31166	0	2.11656
TCGA-62-A46Y-01	N2	1.60998	0.137449	2.42526	4.04834	0.74448	7.05944	5.70798	3.42567	0	3.48941	0	4.26866	0	2.53518
TCGA-64-1677-01	N2	5.39417	0.0499604	0.539799	4.66841	0.00391619	4.58146	3.62059	3.97733	3.4141	3.53212	3.7087	4.53341	3.4141	1.37937
TCGA-64-1679-01	N2	2.91295	0.228389	2.15329	3.75872	0.106488	3.66703	4.97139	3.12351	0.861117	4.89175	2.96416	4.30251	6.75791	1.63735
TCGA-64-1680-01	N2	2.11223	0.0500013	2.20241	3.98115	0.409546	4.49846	5.37524	3.36762	0	3.00187	2.11223	4.3391	1.62164	1.3137
TCGA-64-5779-01	N2	0.471131	0.465144	0.737836	3.77387	0.0157131	2.63544	4.68224	4.22832	0	4.77064	0.825697	4.68001	0.825697	1.61743
TCGA-69-7974-01	N2	6.7085	0.0647201	2.71816	3.96531	0.0157191	6.21394	5.67511	3.562	8.4142	3.48304	5.18629	4.92823	0.56733	2.58641
TCGA-73-4659-01	N2	0.953866	0.112758	0.902725	3.99241	0.0404745	5.63596	4.62363	3.15953	0	3.79775	0	4.48795	2.24739	1.78214
TCGA-75-5126-01	N2	6.7669	0.142041	1.44261	4.02094	0.619355	5.12234	4.37876	3.02555	0	3.87414	1.88408	4.29588	0.469316	2.92422
TCGA-75-6203-01	N2	3.5552	0.549654	2.05485	4.22997	0.0597611	5.25189	5.79972	3.02628	0	3.14413	0.923145	4.33176	0.923145	3.38855
TCGA-75-6207-01	N2	3.438	0.0657141	1.34907	4.54629	0.118202	7.64019	3.1952	3.44125	0	4.23957	0.825048	4.48419	5.92596	1.90707
TCGA-75-6214-01	N2	2.24333	0.0326366	1.19099	4.57066	0.004842	7.6043	2.92152	3.72383	0	4.82192	2.36453	4.4311	9.32444	0.752867
TCGA-78-7146-01	N2	5.13646	0.00929954	0.236366	3.67561	0	7.68226	2.80767	3.51867	0	4.32691	2.55632	4.58596	6.88472	1.48375
TCGA-78-7154-01	N2	6.17079	0.963946	1.64413	3.87051	0.0103352	7.39236	4.08941	2.78334	0	4.7664	0	4.56828	1.96937	1.7011
TCGA-78-7158-01	N2	0	1.87552	2.50424	4.29927	0.0131942	3.80942	4.83053	4.3038	0	4.15381	0.479798	4.68258	12.1156	1.15286
TCGA-78-7160-01	N2	4.35659	0.342473	2.44333	4.55066	0.0242362	5.87166	4.827	3.81454	0	3.95811	0	4.66131	1.49194	2.70729
TCGA-78-7220-01	N2	0.630614	0.0658874	1.67372	4.32261	0.0159134	5.03549	2.62813	4.43331	0	4.18259	1.47598	4.71682	0.865789	1.32807
TCGA-78-7536-01	N2	0	0.0413367	1.47133	4.91042	0.00346178	0.459854	3.34528	4.26049	0.808019	4.36176	1.08828	4.6625	0.459854	2.23375
TCGA-86-7714-01	N2	5.23537	0.0725761	2.8775	4.31684	1.18328	5.00186	5.44762	3.4847	0	4.15322	2.02002	4.7373	0	2.10004
TCGA-86-8359-01	N2	2.01826	0.316994	1.70055	3.89056	0.0127231	6.00004	3.43274	3.1802	0	3.6852	1.84531	4.44701	6.44102	1.77252
TCGA-86-A4P8-01	N2	0.602986	0.733047	2.62628	4.18326	0.0751887	4.77935	5.91994	3.80423	0	2.39334	0.602986	4.40172	0	4.08984
TCGA-91-6848-01	N2	8.23442	0.12755	0.45133	3.55359	0.0962705	5.20077	4.22909	3.8977	0	4.57611	1.3665	4.79883	2.7629	2.94873
TCGA-91-6849-01	N2	3.07435	1.09872	2.13678	4.22051	0.0768552	6.95229	4.8894	3.26163	0	3.12825	1.01211	4.41138	1.27715	2.23627
TCGA-95-A4VK-01	N2	1.17406	0.151807	1.88713	3.99626	0.0181056	5.54643	3.20659	3.62786	0	3.52114	2.6501	4.48038	0	1.34177
TCGA-95-A4VP-01	N2	0.871878	0.45999	0.815435	3.6015	0.0213242	5.73587	4.8032	2.81011	0	3.78859	0.871878	3.90992	3.82195	1.65144
TCGA-97-7554-01	N2	0.913776	0.0444436	1.72458	4.24104	0.0109534	1.61476	5.23819	3.06627	0	3.89492	1.12342	4.69664	0.37257	1.97905
TCGA-97-8171-01	N2	0	1.90462	1.53839	3.92517	0.00637267	5.98049	3.93384	4.107	0	3.64887	0	4.54143	0.866357	0.599433
TCGA-97-8547-01	N2	2.24431	0.370639	1.35647	3.27451	0.049522	6.36055	4.3586	3.2221	0	4.06043	2.0718	4.49695	5.97604	1.83254
TCGA-99-8025-01	N2	2.4726	0.12589	1.82046	3.98752	0.0258221	2.80166	4.48689	3.53465	0.512583	3.00024	5.06272	4.51857	0.890022	1.31517
TCGA-L9-A5IP-01	N2	6.8439	0.0198523	0.1269	3.96702	0.00171233	5.36424	2.29219	3.1123	0	4.73112	2.71853	3.95186	8.19721	0.952014
TCGA-MP-A4T6-01	N2	2.5533	1.16611	1.38951	3.41842	0.0112256	6.48474	4.8042	3.74117	0	3.47992	0.78362	3.9194	7.78109	1.40257
TCGA-MP-A4T8-01	N2	3.57372	0.439306	0.571809	4.03219	0.00705669	2.50446	3.49545	3.40588	0	4.12246	1.80446	4.17027	0	0.903549
TCGA-MP-A4T9-01	N2	0.676721	0.230227	2.00102	3.89146	0.125728	6.19101	4.71156	3.53891	0.780901	3.89904	2.30746	4.32337	0.163114	2.51774
TCGA-MP-A4TC-01	N2	6.38858	0.0642277	1.99622	4.03403	0.00561853	5.60131	4.5869	3.00003	0.993174	4.14967	4.08665	4.12265	5.8122	2.10841
TCGA-MP-A4TD-01	N2	2.14666	0.0910885	1.3529	3.64629	0.1272	3.42715	4.6545	3.2304	0	4.20878	0	4.1137	7.05075	2.33691
TCGA-NJ-A4YI-01	N2	0.237337	0.100903	2.59454	3.97699	0.0165852	6.07723	5.18376	3.40746	0	3.36272	0.778427	4.68389	7.59681	2.15475
TCGA-05-4398-01	N3	1.34661	0.0830518	0.302153	3.99393	0.609737	5.2197	3.67226	3.28001	0.825028	3.84698	5.02832	4.63878	2.49299	2.02401
TCGA-55-A48Z-01	N3	4.00802	0.0614803	1.67835	4.09213	0.0200482	7.07623	3.98592	3.38142	0	4.03309	2.08746	4.3724	7.2882	1.71434
